# Supplementary material for: Effect of Adolescent Stress on Adult Morphine-Induced Behavioral Sensitization is Dependent Upon Genetic Background
Source: bioRxiv preprint, doi:10.1101/2021.01.20.427504, version 2 (2021-03-05)
Supplement: Supplemental Table 3 [file 427504_file07.xlsx]

## Sheet: mPFC-deseq2.txt
									CVSS	CVSS	CVSS	CVSS	CVSS	CON	CON	CON	CON	CON	CON
Locus	Id	Name	baseMean	log2FoldChange	lfcSE	stat	pvalue	padj	CVSS_1_S11	CVSS_5_S12	CVSS_9_S13	CVSS_13_S14	CVSS_17_S15	CVSS_21_S16	CVSS_25_S17	CVSS_29_S19	CVSS_33_S20	CVSS_37_S21	CVSS_41_S22
chr4:156053916-156053937	MIMAT0001537	mmu-miR-429-3p	8774.31	6.5192	1.16118	5.61431	1.97352e-08	6.33021e-06	38.24	674.142	29.8941	100.268	26.3775	5055.51	28569.8	68.5846	1264.77	40746.5	19943.3
chr4:156054911-156054932	MIMAT0000519	mmu-miR-200a-3p	12676.2	7.08366	1.27554	5.55344	2.80098e-08	6.33021e-06	19.12	565.21	48.044	189.919	29.0828	5751.69	37732.9	31.0436	1710.8	68785.2	24575.7
chr6:30169506-30169528	MIMAT0000541	mmu-miR-96-5p	562.162	7.01141	1.25143	5.60271	2.11026e-08	6.33021e-06	2.94154	25.6914	2.13529	8.25735	0.676345	238.078	1271.63	2.88777	98.9823	3230.01	1302.49
chr6:124717917-124717938	MIMAT0000153	mmu-miR-141-3p	3591.55	7.26371	1.27252	5.70812	1.14229e-08	6.33021e-06	5.88307	127.429	9.60881	61.3403	8.79248	1708.66	8295.26	7.94138	532.793	22032.8	6716.6
chr4:156055685-156055706	MIMAT0000233	mmu-miR-200b-3p	4388.66	5.87183	1.23571	4.7518	2.01617e-06	0.000364523	29.4154	541.574	13.8794	75.4958	16.9086	3033.99	12777.5	42.5947	695.32	18703.4	12345.3
chr6:30169711-30169732	MIMAT0000212	mmu-miR-183-5p	18040.5	5.81512	1.35431	4.2938	1.75642e-05	0.00264634	30.8861	2470.48	79.0057	276.031	37.8753	9333.18	35396.7	49.0922	4157.25	111633	34981.7
chr4:156054949-156054970	MIMAT0004619	mmu-miR-200a-5p	190.5	6.05131	1.48019	4.08821	4.34721e-05	0.00491234	0	20.5531	0	4.71849	0.676345	110.014	648.523	0.721943	42.7701	847.658	419.86
chr6:30165962-30165986	MIMAT0000211	mmu-miR-182-5p	210610	5.60888	1.36252	4.11656	3.84564e-05	0.00491234	469.175	32814	1132.77	3829.05	649.967	105849	410648	880.049	48099.3	1.35035e+06	361986
chr6:124718324-124718346	MIMAT0000657	mmu-miR-200c-3p	537.615	5.39321	1.44751	3.72584	0.000194664	0.0195529	1.47077	96.5996	3.20294	12.9758	0.676345	327.465	1634.01	0.721943	61.1002	2796.64	978.899
chr6:124717959-124717980	MIMAT0004533	mmu-miR-141-5p	54.5037	6.90161	1.87726	3.67644	0.000236512	0.0213807	0	4.11062	0	0	0	26.6441	159.072	0	6.11002	293.42	110.184
chr6:30169672-30169693	MIMAT0004539	mmu-miR-183-3p	119.964	5.45612	1.55339	3.5124	0.000444075	0.0364949	0	21.5808	1.06765	1.17962	0.676345	51.5693	338.851	0	20.7741	690.213	193.692
chr11:70234763-70234786	MIMAT0031404	mmu-miR-497b	4.57138	2.90435	0.844614	3.43867	0.000584589	0.0440391	1.47077	0	1.06765	1.17962	1.35269	3.43795	13.1775	4.33166	6.11002	13.518	4.63933
chr11:70234770-70234790	MIMAT0017247	mmu-miR-497a-3p	3.76839	2.9807	0.919468	3.24177	0.0011879	0.082605	1.47077	0	1.06765	0	1.35269	3.43795	10.3538	4.33166	3.66601	11.1325	4.63933
chr6:30165923-30165943	MIMAT0016995	mmu-miR-182-3p	6.89935	5.43563	1.6927	3.21122	0.00132172	0.0853453	0	1.02765	0	0	0	0.859488	22.5901	0	2.44401	37.3733	11.5983
chr12:112130927-112130948	MIMAT0000236	mmu-miR-203-3p	337.039	0.776212	0.247662	3.13416	0.00172348	0.0973764	276.504	208.614	253.032	245.361	230.634	371.299	534.631	347.977	211.407	419.058	608.913
chr12:112130927-112130946	MIMAT0049831	mmu-miR-203b-5p	337.039	0.776212	0.247662	3.13416	0.00172348	0.0973764	276.504	208.614	253.032	245.361	230.634	371.299	534.631	347.977	211.407	419.058	608.913
chr17:25245551-25245571	MIMAT0027833	mmu-miR-3547-3p	37.6592	-2.93645	0.958937	-3.06219	0.00219721	0.11684	4.4123	21.5808	35.2323	291.366	5.41076	5.15693	14.1188	7.21943	10.998	7.15659	11.5983
chr3:122293615-122293634	MIMAT0003898	mmu-miR-760-3p	87.9101	-0.9452	0.319737	-2.95618	0.00311479	0.156432	66.1845	196.282	106.765	165.147	60.871	45.5529	64.9464	51.9799	80.6522	65.9997	62.631
chr13:63301213-63301235	MIMAT0000218	mmu-miR-24-1-5p	36.3057	0.796266	0.275326	2.89208	0.003827	0.182085	17.6492	16.4425	30.9617	37.7479	26.3775	35.239	53.6514	39.7069	40.3261	54.8672	46.3933
chr13:63301211-63301232	MIMAT0014857	mmu-miR-3074-1-3p	36.5064	0.77233	0.27392	2.81954	0.00480919	0.217375	17.6492	17.4701	30.9617	38.9275	26.3775	35.239	53.6514	39.7069	40.3261	54.8672	46.3933
chr13:55477681-55477703	MIMAT0027789	mmu-miR-6944-3p	432.82	-0.75459	0.278495	-2.70953	0.00673786	0.290049	405.932	965.996	521.011	438.819	449.769	311.994	198.604	311.158	453.363	419.058	285.319
chr4:156055721-156055742	MIMAT0004545	mmu-miR-200b-5p	66.0143	4.52987	1.6831	2.69138	0.00711581	0.292395	1.47077	22.6084	0	1.17962	0	24.9252	183.544	0	12.22	351.468	128.742
chr12:109712523-109712544	MIMAT0004638	mmu-miR-323-5p	49.3382	-0.907042	0.342539	-2.64799	0.00809713	0.318253	52.9476	124.346	55.5176	50.7237	46.6678	37.8175	19.7663	39.7069	56.2121	23.0601	35.9548
chr11:70234730-70234751	MIMAT0003453	mmu-miR-497a-5p	681.887	0.552212	0.211829	2.60688	0.00913705	0.344162	519.181	497.385	557.311	508.417	635.764	572.419	866.893	820.128	591.45	1215.03	716.777
chr12:109720061-109720083	MIMAT0003734	mmu-miR-667-3p	864.335	-0.576198	0.223165	-2.58193	0.00982485	0.346971	807.451	1583.62	790.057	1204.39	882.63	794.167	723.823	876.439	697.764	555.829	591.515
chr14:61632075-61632096	MIMAT0000526	mmu-miR-15a-5p	831.067	0.501162	0.196482	2.55068	0.0107513	0.346971	764.799	489.164	672.616	684.18	777.797	824.249	1124.8	847.562	783.304	1320.79	852.478
chr14:115044183-115044205	MIMAT0000529	mmu-miR-20a-5p	58.636	0.645722	0.255288	2.52939	0.0114262	0.346971	47.0646	31.8573	55.5176	43.646	45.9915	60.1642	87.5365	47.6483	84.3182	89.0598	52.1925
chr16:24827908-24827929	MIMAT0004661	mmu-miR-28a-3p	79.7602	-0.585329	0.230295	-2.54165	0.011033	0.346971	73.5384	140.789	104.629	89.6512	78.456	63.6021	49.8864	59.1994	76.9862	80.3129	60.3113
chr3:82106284-82106305	MIMAT0027924	mmu-miR-7010-5p	2.22519	-2.35647	0.932632	-2.52668	0.0115145	0.346971	5.88307	5.13827	4.27058	1.17962	3.38172	0.859488	1.8825	0.721943	0	0	1.15983
chr3:118433865-118433887	MIMAT0016986	mmu-miR-137-5p	16.7267	-0.973145	0.384449	-2.53127	0.0113649	0.346971	29.4154	29.802	23.4882	17.6943	13.5269	16.3303	6.58877	8.66332	15.886	6.36141	16.2377
chr12:109743204-109743225	MIMAT0001090	mmu-miR-409-3p	3461.49	-0.462281	0.183847	-2.51448	0.0119208	0.347625	3790.17	5484.59	3579.81	4082.67	3412.84	3274.65	2520.67	3165.72	3470.49	2174.81	3119.95
chr12:109591781-109591802	MIMAT0001420	mmu-miR-433-3p	1667.47	-0.587951	0.236643	-2.48455	0.0129716	0.366448	1456.06	3408.73	1690.08	1964.07	1679.36	1408.7	1112.56	1418.62	1727.91	1100.52	1375.56
chr10:122985642-122985663	MIMAT0004520	mmu-let-7i-3p	52.7741	0.687401	0.285273	2.40963	0.0159688	0.372961	29.4154	21.5808	60.8558	49.5441	36.5226	53.2883	77.1827	51.9799	67.2102	81.9032	51.0327
chr12:109715587-109715608	MIMAT0003455	mmu-miR-679-5p	46.5248	-0.644219	0.267451	-2.40873	0.016008	0.372961	64.7138	80.1571	42.7058	42.4664	59.5184	43.8339	24.4726	46.9263	35.4381	28.6264	42.9138
chr14:115044358-115044380	MIMAT0000513	mmu-miR-19b-3p	205.572	0.586254	0.244789	2.39493	0.0166233	0.372961	188.258	84.2677	134.523	214.691	185.995	255.268	285.199	182.652	210.185	289.444	230.807
chr16:13449570-13449591	MIMAT0004859	mmu-miR-193b-3p	123.612	-0.605985	0.253086	-2.39439	0.0166482	0.372961	108.837	155.176	219.935	178.123	98.07	110.014	79.0652	114.067	125.866	73.1563	97.426
chr19:58911725-58911744	MIMAT0014880	mmu-miR-3086-5p	87.4849	-0.581546	0.240613	-2.41694	0.0156518	0.372961	107.366	137.706	86.4793	73.1365	128.506	71.3375	50.8276	93.1307	84.3182	56.4576	73.0695
chr2:94241419-94241439	MIMAT0000209	mmu-miR-129-5p	2466.87	-0.401183	0.167961	-2.38854	0.0169153	0.372961	2610.61	3848.57	2359.5	2733.18	2664.8	2655.82	2043.46	2194.71	2128.73	1802.67	2093.5
chr2:94241420-94241442	MIMAT0029863	mmu-miR-129b-3p	2467.21	-0.401322	0.167861	-2.3908	0.0168115	0.372961	2612.08	3848.57	2359.5	2734.36	2664.8	2654.96	2043.46	2194.71	2129.95	1803.46	2093.5
chr5:136991520-136991541	MIMAT0003492	mmu-miR-702-3p	54.3028	-0.735842	0.302018	-2.43641	0.0148337	0.372961	44.123	106.876	64.0587	77.855	54.1076	48.1313	20.7075	54.8677	52.5461	35.783	38.2745
chr6:30169465-30169486	MIMAT0017021	mmu-miR-96-3p	1.79604	3.47853	1.41735	2.45425	0.014118	0.372961	0	0	0	0	0.676345	0.859488	4.70626	0	1.222	11.1325	1.15983
chr14:64590709-64590728	MIMAT0000134	mmu-miR-124-3p	7042.53	0.460065	0.194022	2.3712	0.0177304	0.377426	6534.62	4119.87	6595.91	4534.46	7439.79	7317.68	7187.4	8054.72	7064.4	10171.9	8447.07
chr6:27936711-27936733	MIMAT0003730	mmu-miR-592-5p	697.601	0.667025	0.281851	2.36659	0.0179528	0.377426	783.919	342.209	462.29	598.068	457.209	684.152	897.013	984.009	413.037	1216.62	835.08
chr2:180894083-180894102	MIMAT0000134_1	mmu-miR-124-3p	1348.81	0.454831	0.193788	2.34706	0.0189223	0.380127	1273.68	796.432	1260.89	849.327	1429.12	1475.74	1340.34	1581.78	1319.76	1825.73	1684.08
chr3:17795723-17795742	MIMAT0000134_2	mmu-miR-124-3p	11491.6	0.46373	0.196979	2.35421	0.018562	0.380127	10871.9	6657.15	10604.9	7319.55	12158.7	12240.8	11456	13493.1	11461.2	16651.8	13492.3
chr12:109712858-109712876	MIMAT0003889	mmu-miR-758-3p	296.55	-0.662501	0.286916	-2.30904	0.0209413	0.411542	291.212	325.767	310.685	721.928	206.962	252.689	221.194	285.168	201.631	203.565	241.245
chrX:104116228-104116250	MIMAT0003735	mmu-miR-672-5p	73.5131	-0.593132	0.259547	-2.28526	0.0222974	0.428869	73.5384	145.927	76.8705	94.3697	60.1947	42.9744	62.1226	67.8627	53.7681	68.3852	62.631
chr5:125781683-125781704	MIMAT0049867	mmu-miR-12200-5p	1.44003	-2.55306	1.12562	-2.26813	0.0233213	0.432774	2.94154	4.11062	3.20294	1.17962	2.02903	0.859488	0	0.721943	0	0.795177	0
chrX:140310992-140311012	MIMAT0015219	mmu-miR-3475-3p	255.255	-0.466934	0.206071	-2.26589	0.0234579	0.432774	255.914	402.841	210.326	365.683	267.833	189.087	247.549	219.471	189.41	196.409	263.282
chr1:158505689-158505709	MIMAT0003450	mmu-miR-488-3p	3103.07	0.541797	0.241648	2.24209	0.0249554	0.441924	2587.08	1140.7	3479.46	2619.94	2599.19	3359.74	4173.51	3594.56	3046.45	3502.75	4030.42
chr11:70235062-70235082	MIMAT0000225	mmu-miR-195a-5p	781.552	0.586364	0.262361	2.23495	0.0254204	0.441924	719.205	634.063	573.325	349.168	792.676	779.556	783.122	879.327	665.992	1542.64	877.994
chr8:38252178-38252199	MIMAT0000748	mmu-miR-383-5p	920.45	-0.514286	0.229047	-2.24533	0.0247469	0.441924	1167.79	1519.9	901.093	990.882	921.858	830.265	764.297	812.186	983.713	422.239	810.724
chr18:24429110-24429131	MIMAT0000216	mmu-miR-187-3p	632.888	-2.19191	0.989039	-2.21621	0.0266775	0.455027	72.0676	132.567	2259.14	2963.21	86.5722	107.436	171.308	104.682	532.793	420.649	111.344
chr12:109590502-109590523	MIMAT0004753	mmu-miR-431-3p	756.11	-0.436449	0.198514	-2.19859	0.0279073	0.467189	692.732	855.009	869.063	1304.66	687.166	715.094	562.869	726.997	731.98	553.443	618.191
chr12:109734910-109734931	MIMAT0003128	mmu-miR-485-5p	597.463	-0.600932	0.275294	-2.18287	0.0290454	0.477401	644.196	1334.92	564.784	506.058	618.856	613.674	388.737	563.838	563.343	338.745	434.938
chr13:113037549-113037570	MIMAT0001542	mmu-miR-449a-5p	28.6867	0.817209	0.376077	2.17298	0.0297817	0.480762	11.7661	13.3595	33.097	29.4905	13.5269	16.3303	30.1201	31.0436	48.8801	48.5058	39.4343
chr18:60953873-60953894	MIMAT0028408	mmu-miR-7220-5p	29.5987	-0.756572	0.350787	-2.15678	0.0310225	0.483918	17.6492	67.8252	39.5029	27.1313	37.199	20.6277	30.1201	23.8241	28.1061	12.7228	20.877
chr2:174267553-174267575	MIMAT0000376	mmu-miR-298-5p	1697.9	-0.7342	0.340465	-2.15646	0.0310478	0.483918	1126.61	1797.37	2918.94	3977.68	1029.4	962.627	952.547	1186.15	1685.14	1728.71	1311.77
chr3:95004213-95004236	MIMAT0027931	mmu-miR-7013-3p	1.4393	-2.49656	1.16188	-2.14872	0.0316566	0.485043	4.4123	2.05531	3.20294	2.35924	1.35269	0.859488	0	0	0	1.59035	0
chr14:64591200-64591222	MIMAT0014864	mmu-miR-3078-5p	78.0401	-0.465425	0.217441	-2.14047	0.0323169	0.486907	89.7168	120.236	85.4116	61.3403	101.452	81.6514	57.4164	65.6969	74.5422	54.8672	66.1105
chr5:138165574-138165596	MIMAT0000540	mmu-miR-93-5p	979.96	0.342334	0.16126	2.12287	0.0337645	0.500379	801.568	799.515	765.502	997.96	910.36	887.851	1221.75	988.341	1176.79	1328.74	901.191
chr12:109734774-109734797	MIMAT0003732	mmu-miR-668-3p	1782.3	-0.409904	0.194009	-2.11281	0.0346167	0.504734	1434	2693.48	2173.73	2191.74	1807.19	1722.41	1334.7	1623.65	1949.1	1399.51	1275.82
chr1:74394324-74394344	MIMAT0000534	mmu-miR-26b-5p	18263.3	0.518615	0.248494	2.08703	0.036885	0.509836	15403.4	7912.94	14145.2	21037.4	15385.5	18251.2	26451.1	18553.2	16049.8	28440.3	19266
chr11:65734799-65734820	MIMAT0004187	mmu-miR-744-5p	4368.98	-0.489842	0.234421	-2.08958	0.0366555	0.509836	4659.39	8383.61	4602.62	4236.02	4032.37	3992.32	3106.13	4416.85	4441.98	2554.9	3632.6
chr12:108658638-108658659	MIMAT0004653	mmu-miR-342-5p	85.1484	-0.49895	0.239516	-2.08316	0.0372369	0.509836	108.837	147.982	105.697	73.1365	71.0162	77.3539	58.3576	60.6432	89.2062	77.1322	67.2703
chr12:109586122-109586141	MIMAT0003167	mmu-miR-540-3p	546.293	-0.479041	0.23104	-2.07341	0.0381338	0.509836	601.544	924.889	663.008	491.902	547.163	458.107	331.321	584.774	602.448	333.179	470.892
chr16:20604516-20604536	MIMAT0017231	mmu-miR-1224-3p	51.2041	-0.650057	0.310681	-2.09236	0.0364064	0.509836	42.6523	89.406	41.6382	82.5735	62.9001	33.52	72.4764	36.8191	30.5501	40.554	30.1557
chrX:7807142-7807163	MIMAT0005859	mmu-miR-1198-5p	103.035	-0.534606	0.258128	-2.07109	0.0383505	0.509836	102.954	214.78	103.562	80.2142	117.684	103.139	68.7114	79.4138	90.4282	86.6743	85.8277
chr1:184822465-184822488	MIMAT0009458	mmu-miR-1981-5p	173.745	-0.607725	0.295263	-2.05825	0.0395661	0.518373	195.612	388.454	139.862	129.758	215.078	198.542	138.364	132.116	119.756	99.3971	154.258
chr15:85706664-85706685	MIMAT0005439	mmu-let-7c-2-3p	179.08	0.479425	0.236966	2.02318	0.0430546	0.522849	147.077	75.0188	206.056	143.914	165.028	205.418	170.367	217.305	193.076	255.252	191.373
chr19:34820700-34820722	MIMAT0000647	mmu-miR-107-3p	10957.5	-0.244764	0.121314	-2.01761	0.0436316	0.522849	11744.1	13697.6	11073.6	12632.6	10739	11580.7	10311.4	10172.9	9694.15	9980.26	8906.36
chr2:131288103-131288125	MIMAT0000546_1	mmu-miR-103-3p	2481.35	-0.257153	0.125678	-2.04612	0.040745	0.522849	2641.5	3228.89	2500.43	2766.21	2484.21	2568.15	2244.89	2339.1	2258.26	2299.65	1963.6
chr2:155622893-155622913	MIMAT0003482	mmu-miR-499-5p	7.42694	0.995093	0.488368	2.03759	0.041591	0.522849	5.88307	7.19358	3.20294	4.71849	3.38172	10.3139	5.64751	12.273	13.442	6.36141	9.27867
chr3:88440879-88440899	MIMAT0027927	mmu-miR-7011-3p	0.851317	-2.81732	1.39626	-2.01777	0.0436157	0.522849	1.47077	4.11062	1.06765	1.17962	0.676345	0.859488	0	0	0	0	0
chr4:63256867-63256888	MIMAT0003485	mmu-miR-455-5p	28.562	0.721873	0.358337	2.01451	0.0439564	0.522849	36.7692	9.24889	20.2853	23.5924	16.9086	29.2226	54.5926	22.3802	24.4401	34.9878	41.754
chr6:29022624-29022644	MIMAT0000209_1	mmu-miR-129-5p	475.348	-0.400276	0.19865	-2.01498	0.0439063	0.522849	483.883	784.101	443.073	484.824	542.429	534.602	416.033	439.664	388.597	317.276	394.343
chr12:109563744-109563765	MIMAT0003891	mmu-miR-770-3p	139.789	-0.558194	0.279273	-1.99874	0.0456363	0.532932	110.308	235.333	115.306	274.852	111.597	124.626	125.187	121.286	122.2	91.4453	105.545
chr13:113036008-113036028	MIMAT0003460	mmu-miR-449c-5p	3.09922	1.72369	0.866102	1.99017	0.0465726	0.532932	1.47077	1.02765	1.06765	1.17962	2.02903	2.57846	0.941252	10.1072	8.55402	3.97588	1.15983
chr7:24970010-24970031	MIMAT0027997	mmu-miR-7046-3p	44.593	-0.610316	0.306312	-1.99246	0.0463203	0.532932	33.8277	66.7976	39.5029	92.0105	42.6097	23.2062	48.9451	37.5411	35.4381	38.1685	32.4753
chr8:105308379-105308400	MIMAT0000565	mmu-miR-328-3p	4617.82	-0.429385	0.216352	-1.98465	0.047183	0.533168	4699.1	8752.54	4977.36	3804.28	4626.88	4326.66	3401.69	4148.29	4544.63	3892.39	3622.16
chr12:109594565-109594586	MIMAT0001422	mmu-miR-434-3p	85478.6	-0.322832	0.163577	-1.97358	0.0484298	0.533909	88712.3	93000.7	87019.5	125627	85515	75599.7	96498.1	80528.5	68481.1	63557.7	75724.4
chr7:78888335-78888356	MIMAT0017070	mmu-miR-7a-2-3p	48.1509	-0.768775	0.38854	-1.97863	0.047858	0.533909	25.0031	88.3783	54.4499	116.783	26.3775	26.6441	40.4738	31.0436	31.7721	49.301	39.4343
chr12:109572044-109572066	MIMAT0004824	mmu-miR-673-3p	508.545	-0.528575	0.269402	-1.96203	0.0497586	0.533948	679.495	920.779	512.47	384.557	555.956	483.032	248.491	493.087	581.674	318.071	416.38
chr3:69009960-69009981	MIMAT0017018	mmu-miR-16-2-3p	5.06292	1.18413	0.609334	1.94332	0.0519772	0.533948	2.94154	1.02765	2.13529	4.71849	4.05807	3.43795	11.295	5.0536	4.88801	10.3373	5.79917
chr7:19181525-19181547	MIMAT0000569	mmu-miR-330-3p	384.105	-0.485452	0.249065	-1.9491	0.0512834	0.533948	401.52	807.737	337.376	322.037	405.807	336.919	306.848	363.138	350.715	252.071	340.991
chr7:101475382-101475403	MIMAT0000656	mmu-miR-139-5p	1561.95	-0.402857	0.206866	-1.94743	0.0514833	0.533948	1513.42	1880.61	1735.99	2347.45	1528.54	1457.69	1639.66	1343.54	1487.18	797.562	1449.79
chr8:84178885-84178906	MIMAT0017068	mmu-miR-181c-3p	1147.88	0.419792	0.214068	1.96102	0.0498769	0.533948	879.519	581.653	1122.1	1204.39	1059.16	1065.77	1344.11	1295.17	1081.47	1730.3	1263.06
chrX:151912403-151912423	MIMAT0017017	mmu-let-7f-2-3p	182.911	0.498308	0.256258	1.94455	0.0518287	0.533948	172.08	60.6316	171.891	192.278	150.825	201.98	239.078	217.305	179.634	233.782	192.532
chr12:109734946-109734967	MIMAT0003129	mmu-miR-485-3p	369.079	-0.421557	0.219981	-1.91633	0.0553231	0.549584	325.04	692.639	390.758	415.227	317.206	316.292	276.728	288.777	351.937	357.034	328.233
chr2:174267093-174267113	MIMAT0000374	mmu-miR-296-5p	107.498	-0.489446	0.25483	-1.92067	0.0547727	0.549584	79.4215	214.78	101.426	135.656	106.186	88.5273	80.9477	102.516	75.7642	100.987	96.2662
chr7:100882367-100882387	MIMAT0014934	mmu-miR-3102-5p.2-5p	7.40729	-0.940122	0.489224	-1.92166	0.0546487	0.549584	10.2954	13.3595	9.60881	11.7962	5.41076	3.43795	5.64751	5.0536	8.55402	7.15659	1.15983
chr11:28746204-28746225	MIMAT0003729	mmu-miR-216b-5p	1.42145	-2.98393	1.58393	-1.88388	0.0595816	0.54961	0	0	3.20294	9.43697	0.676345	0	0	0	0	0	2.31967
chr11:28746198-28746220	MIMAT0029889	mmu-miR-216c-3p	1.42145	-2.98393	1.58393	-1.88388	0.0595816	0.54961	0	0	3.20294	9.43697	0.676345	0	0	0	0	0	2.31967
chr12:109742422-109742446	MIMAT0003170	mmu-miR-541-5p	26812.7	-0.446734	0.235245	-1.89902	0.0575623	0.54961	36641.2	42372.3	24861.2	21899.7	31071.3	28214.4	17597.7	25134.5	28414	14790.3	23943.6
chr14:54949107-54949128	MIMAT0017014	mmu-miR-208a-5p	9.07367	0.923845	0.483535	1.91061	0.0560552	0.54961	5.88307	5.13827	5.33823	12.9758	2.02903	8.59488	11.295	9.38526	8.55402	16.6987	13.918
chr14:61631894-61631915	MIMAT0004625	mmu-miR-16-1-3p	15.5118	0.936613	0.496236	1.88744	0.0591018	0.54961	11.7661	2.05531	23.4882	8.25735	6.76345	12.0328	22.5901	15.1608	12.22	36.5781	19.7172
chr5:138165332-138165353	MIMAT0000652	mmu-miR-25-3p	1711.54	0.402933	0.213374	1.88839	0.0589733	0.54961	1379.58	1428.44	1440.25	1540.59	1489.31	1297.83	2153.58	1381.8	2132.4	2879.34	1703.8
chr8:85062086-85062106	MIMAT0028046	mmu-miR-7070-5p	10.1591	-0.791894	0.418243	-1.89338	0.0583073	0.54961	16.1784	9.24889	17.0823	8.25735	14.8796	7.73539	11.295	7.21943	8.55402	3.18071	8.11883
chrX:7241984-7242005	MIMAT0004684	mmu-miR-362-3p	26.4236	0.914105	0.488441	1.87148	0.0612792	0.559559	16.1784	1.02765	17.0823	28.3109	26.3775	20.6277	53.6514	25.268	25.6621	53.2768	23.1967
chr13:48538188-48538209	MIMAT0004620	mmu-let-7a-1-3p	68.8295	0.434835	0.23391	1.85899	0.0630291	0.562793	66.1845	30.8296	70.4646	55.4422	66.2818	82.5108	70.5939	75.0821	69.6542	97.0116	73.0695
chr15:68341217-68341238	MIMAT0017011	mmu-miR-30d-3p	382.496	0.356619	0.192409	1.85345	0.0638186	0.562793	377.987	212.725	377.946	324.396	366.579	410.835	470.626	379.742	356.825	531.973	397.823
chr2:32318485-32318507	MIMAT0000672	mmu-miR-199b-5p	2.99652	1.55638	0.836317	1.861	0.0627445	0.562793	1.47077	3.08296	0	1.17962	1.35269	2.57846	4.70626	2.88777	10.998	2.38553	2.31967
chrX:19146901-19146923	MIMAT0000670	mmu-miR-222-3p	5993.41	-0.475606	0.256901	-1.85132	0.0641235	0.562793	7295.01	10785.2	6635.41	4376.4	6295.42	7083.9	3637	5200.16	6046.47	3494.8	5077.75
chr1:92850381-92850403	MIMAT0000159	mmu-miR-149-5p	2118.64	-0.435911	0.237512	-1.83532	0.0664576	0.576234	2125.26	3214.5	1651.65	3606.1	1753.09	1688.03	2400.19	1843.84	1518.95	1634.88	1868.49
chr1:195037050-195037074	MIMAT0017063	mmu-miR-29b-2-5p	33.8382	-0.457246	0.249706	-1.83113	0.0670807	0.576234	38.24	38.0232	29.8941	46.0052	45.9915	28.3631	23.5313	36.8191	31.7721	22.265	31.3155
chr12:109590459-109590479	MIMAT0001418	mmu-miR-431-5p	493.785	-0.473452	0.259017	-1.82788	0.0675672	0.576234	316.215	523.076	677.955	961.391	434.213	412.554	416.975	370.357	531.571	384.866	402.462
chrX:146999424-146999444	MIMAT0035715	mmu-miR-3552	20.6341	-1.16911	0.644328	-1.81446	0.069607	0.588082	11.7661	11.3042	43.7735	70.7773	10.1452	6.8759	0.941252	18.0486	31.7721	11.1325	10.4385
chr9:3038680-3038698	MIMAT0019349	mmu-miR-101c	12.3774	0.840666	0.466048	1.80382	0.0712598	0.596471	11.7661	3.08296	5.33823	14.1555	9.46883	15.4708	18.825	9.38526	14.664	27.036	6.959
chr14:115043867-115043889	MIMAT0000528	mmu-miR-18a-5p	8.21502	0.896511	0.498394	1.7988	0.0720506	0.597558	2.94154	5.13827	5.33823	8.25735	6.0871	7.73539	14.1188	5.0536	7.33202	19.0842	9.27867
chr12:109713503-109713524	MIMAT0017032	mmu-miR-329-5p	452.934	-0.319838	0.1801	-1.77589	0.075751	0.616927	572.129	477.859	440.937	514.315	534.989	421.149	476.274	464.21	426.479	258.432	395.503
chr12:109717304-109717325	MIMAT0003168	mmu-miR-543-3p	234.503	-0.332493	0.187113	-1.77697	0.0755739	0.616927	213.261	369.956	235.95	279.57	222.517	244.954	190.133	228.134	208.963	205.156	180.934
chr11:117077370-117077391	MIMAT0027343	mmu-miR-6516-5p	44.2021	-0.543587	0.309665	-1.7554	0.0791906	0.630711	73.5384	63.7146	43.7735	20.0536	65.6055	43.8339	24.4726	38.9849	35.4381	37.3733	39.4343
chr14:115043684-115043706	MIMAT0000649	mmu-miR-17-5p	71.4468	0.397629	0.226779	1.75338	0.0795365	0.630711	52.9476	63.7146	48.044	61.3403	77.1033	66.1806	88.4777	62.0871	76.9862	111.325	77.7088
chr7:6803638-6803659	MIMAT0014816	mmu-miR-3099-3p	261.007	-0.421355	0.239719	-1.7577	0.0787979	0.630711	260.326	363.79	312.82	401.071	177.202	197.682	180.72	207.198	257.843	314.095	198.332
chr17:56243017-56243040	MIMAT0000678	mmu-miR-7b-5p	88.9664	-0.553218	0.317238	-1.74386	0.0811843	0.638179	105.895	55.4934	89.6822	218.23	69.6635	75.6349	72.4764	59.9213	75.7642	72.3611	83.508
chr5:138165787-138165807	MIMAT0000386	mmu-miR-106b-5p	99.7875	0.440662	0.25509	1.72748	0.0840814	0.652675	91.1876	46.2445	86.4793	104.986	89.2775	83.3703	150.6	98.9063	85.5402	143.927	117.143
chr7:96249450-96249472	MIMAT0004828	mmu-miR-708-5p	1018.84	0.346658	0.200925	1.72531	0.0844723	0.652675	908.934	497.385	1060.17	1021.55	949.588	1087.25	1128.56	1215.75	928.722	1258.76	1150.55
chr12:112920483-112920503	MIMAT0027783	mmu-miR-6941-3p	2.20654	1.72764	1.00666	1.71621	0.0861241	0.659799	0	1.02765	1.06765	1.17962	1.35269	3.43795	2.82376	0	1.222	6.36141	5.79917
chr4:63256904-63256924	MIMAT0003742	mmu-miR-455-3p	108.934	0.507497	0.29642	1.71209	0.0868806	0.66	75.0092	138.733	62.9911	81.3939	83.8668	87.6678	177.897	72.1943	103.87	138.361	176.295
chr11:96850439-96850459	MIMAT0000162	mmu-miR-152-3p	61.853	0.461289	0.27807	1.6589	0.0971369	0.674111	51.4769	44.1892	40.5705	50.7237	68.3108	46.4123	115.774	57.0335	64.7662	56.4576	84.6678
chr12:109618270-109618289	MIMAT0017174	mmu-miR-370-5p	290.519	-0.298847	0.176733	-1.69095	0.0908458	0.674111	350.043	361.734	257.302	318.498	330.056	271.598	225.901	322.709	305.501	197.204	255.163
chr12:109712558-109712578	MIMAT0000551	mmu-miR-323-3p	610.109	-0.383844	0.229281	-1.67412	0.0941073	0.674111	485.353	945.442	508.199	970.828	585.715	534.602	677.702	500.307	568.231	447.685	487.13
chr12:109717103-109717124	MIMAT0003737	mmu-miR-666-5p	658.551	-0.393494	0.23812	-1.6525	0.0984322	0.674111	563.304	875.562	876.537	895.333	574.217	585.311	352.97	651.193	839.516	482.672	547.441
chr12:109717269-109717289	MIMAT0017207	mmu-miR-543-5p	64.7208	-0.562727	0.339023	-1.65985	0.0969447	0.674111	66.1845	120.236	83.2763	34.209	88.6012	70.478	24.4726	75.0821	56.2121	42.1444	51.0327
chr12:109733781-109733802	MIMAT0000747	mmu-miR-382-5p	810.296	-0.334524	0.201668	-1.65879	0.0971584	0.674111	907.464	1156.11	656.602	1130.08	717.602	794.167	836.773	767.426	680.656	526.407	739.974
chr13:109324790-109324810	MIMAT0005292	mmu-miR-582-3p	1528.52	-0.349949	0.211148	-1.65736	0.097446	0.674111	2335.58	1829.23	1359.11	1443.86	1693.57	1376.04	1318.69	1817.85	1197.56	908.887	1533.3
chr18:61647827-61647848	MIMAT0004534	mmu-miR-145a-3p	94.3062	0.540635	0.322464	1.67657	0.0936257	0.674111	80.8922	35.9679	115.306	57.8014	87.2485	74.7755	108.244	93.8526	81.8742	106.554	194.852
chr19:24942240-24942260	MIMAT0014877	mmu-miR-3084-3p	51.9178	0.435112	0.256799	1.69437	0.0901955	0.674111	39.7107	25.6914	40.5705	47.1849	63.5764	73.0565	47.0626	64.253	48.8801	59.6383	61.4712
chr7:100882330-100882350	MIMAT0014935	mmu-miR-3102-3p.2-3p	70.7259	-0.563293	0.337002	-1.67148	0.0946264	0.674111	48.5353	149.01	64.0587	116.783	51.4022	48.1313	51.7689	51.9799	52.5461	96.2164	47.5532
chr8:107551249-107551270	MIMAT0000151	mmu-miR-140-5p	108.952	0.38025	0.22534	1.68745	0.0915164	0.674111	97.0707	54.4657	91.8175	109.705	114.302	100.56	154.365	109.013	102.648	128.819	135.701
chrX:52741991-52742013	MIMAT0000513_1	mmu-miR-19b-3p	9.26242	0.764545	0.45527	1.67932	0.0930896	0.674111	8.82461	2.05531	6.40587	11.7962	5.41076	12.0328	13.1775	10.8292	7.33202	15.9035	8.11883
chrX:60394416-60394437	MIMAT0003513	mmu-miR-505-3p	4.95271	-1.05837	0.640286	-1.65296	0.0983384	0.674111	5.88307	3.08296	8.54116	14.1555	3.38172	1.71898	5.64751	2.16583	1.222	6.36141	2.31967
chrX:60394451-60394473	MIMAT0017259	mmu-miR-505-5p	6.26963	-0.931772	0.568367	-1.63938	0.101134	0.687404	2.94154	5.13827	7.47352	18.8739	8.11614	3.43795	1.8825	6.49749	2.44401	6.36141	5.79917
chr1:132198142-132198163	MIMAT0017044	mmu-miR-135b-3p	15.1006	-0.591584	0.365174	-1.62001	0.105231	0.693723	22.0615	13.3595	14.947	20.0536	22.3194	18.9087	15.06	8.66332	4.88801	11.9277	13.918
chr11:52126759-52126780	MIMAT0014828	mmu-miR-3061-5p	27.5807	0.499304	0.306869	1.62709	0.103718	0.693723	23.5323	18.4978	30.9617	14.1555	25.0248	24.0657	25.4138	33.9313	45.2141	40.554	22.0368
chr11:77078122-77078144	MIMAT0004825	mmu-miR-423-5p	373.929	-0.44532	0.277076	-1.60722	0.108007	0.693723	373.575	838.566	374.743	250.08	348.994	275.896	286.141	346.533	370.267	338.745	309.676
chr11:79726467-79726488	MIMAT0000711	mmu-miR-365-3p	65.9672	-0.320484	0.200898	-1.59526	0.110655	0.693723	69.1261	87.3507	72.5999	86.1124	55.4603	50.7098	57.4164	65.6969	65.9882	54.8672	60.3113
chr12:109743340-109743359	MIMAT0001094	mmu-miR-412-3p	11.8383	-0.583494	0.364903	-1.59904	0.109812	0.693723	10.2954	15.4148	17.0823	11.7962	16.9086	12.0328	10.3538	8.66332	8.55402	6.36141	12.7582
chr13:63300760-63300780	MIMAT0000126	mmu-miR-27b-3p	64358	0.270665	0.170691	1.5857	0.112807	0.693723	61817.8	41011.6	63770.4	48051.9	74579.9	63798.1	64182.1	72253.5	73025.7	72879.5	72567.3
chr17:35960795-35960814	MIMAT0004861	mmu-miR-877-5p	78.0114	-0.586011	0.364594	-1.6073	0.107989	0.693723	48.5353	129.485	56.5852	191.099	51.4022	51.5693	88.4777	60.6432	68.4322	62.0238	49.8728
chr2:26591365-26591385	MIMAT0000137	mmu-miR-126a-5p	23476.7	0.332307	0.205887	1.61402	0.106522	0.693723	22445.4	12246.6	23765.8	16908.7	27484.6	27546.6	25244.4	27792.7	24598.9	22147.3	28063.3
chr2:26591363-26591385	MIMAT0029895	mmu-miR-126b-3p	23481.7	0.332377	0.205897	1.61428	0.106466	0.693723	22448.3	12248.6	23771.1	16911.1	27490.7	27551.7	25251	27797	24607.5	22150.4	28071.4
chr7:3415120-3415143	MIMAT0035718	mmu-miR-935	81.6746	-0.398789	0.251434	-1.58606	0.112725	0.693723	85.3045	162.369	74.7352	81.3939	66.9581	62.7426	68.7114	80.1357	72.0982	75.5418	68.4302
chr8:84208727-84208747	MIMAT0000537	mmu-miR-27a-3p	4904.53	0.282653	0.177501	1.5924	0.111295	0.693723	4616.74	3023.36	4836.43	3715.81	5739.46	4778.75	4842.74	5782.05	5441.58	5457.3	5715.66
chr8:84208839-84208860	MIMAT0005440	mmu-miR-24-2-5p	495.134	0.460861	0.288632	1.59671	0.110331	0.693723	423.581	170.591	493.252	356.246	609.387	572.419	590.165	698.841	469.249	376.119	686.621
chr8:84208839-84208858	MIMAT0014946	mmu-miR-3074-2-3p	495.134	0.460861	0.288632	1.59671	0.110331	0.693723	423.581	170.591	493.252	356.246	609.387	572.419	590.165	698.841	469.249	376.119	686.621
chr9:112118679-112118701	MIMAT0017069	mmu-miR-128-2-5p	55.2726	-0.440873	0.277846	-1.58675	0.112568	0.693723	57.3599	109.959	55.5176	46.0052	54.1076	65.3211	46.1214	53.4238	40.3261	35.783	44.0737
chrX:104116192-104116212	MIMAT0017241	mmu-miR-672-3p	6.96295	0.829929	0.525897	1.57812	0.114538	0.699609	5.88307	3.08296	7.47352	3.53886	4.73441	5.15693	13.1775	11.5511	2.44401	7.95177	11.5983
chr7:61726256-61726277	MIMAT0014808_2	mmu-miR-344d-3p	1299.61	-0.406428	0.258125	-1.57454	0.115364	0.699925	1347.22	2069.7	1556.63	1373.08	1155.2	1071.78	791.593	1285.78	1890.44	752.237	1002.1
chr13:58392841-58392863	MIMAT0000677	mmu-miR-7a-5p	325.029	-0.476299	0.303774	-1.56794	0.116895	0.704486	330.923	209.642	329.902	780.909	268.509	280.193	227.783	224.524	298.169	294.215	330.553
chr11:35782447-35782469	MIMAT0000546	mmu-miR-103-3p	695.915	-0.219701	0.141097	-1.5571	0.119448	0.715104	739.796	880.7	729.202	767.933	654.026	765.804	654.17	640.364	663.548	632.961	526.564
chr1:23272274-23272295	MIMAT0000128	mmu-miR-30a-5p	132354	0.288491	0.191589	1.50578	0.132124	0.774211	134366	75028	130475	101529	149075	141285	138633	135703	131165	177460	141171
chr4:94665167-94665187	MIMAT0004934	mmu-miR-872-5p	1051.12	0.26183	0.173183	1.51187	0.130566	0.774211	1242.8	698.805	918.175	908.308	975.289	1012.48	1089.03	1139.23	1024.04	1423.37	1130.84
chr4:120772660-120772681	MIMAT0000248	mmu-miR-30e-5p	40088.5	0.372048	0.247478	1.50336	0.132746	0.774211	40518.2	15184.6	41178	31777.8	44067.3	42851.5	43683.5	42454.6	40431.2	55940.7	42886
chrX:53048206-53048227	MIMAT0001546	mmu-miR-450a-5p	14.3268	0.568529	0.377948	1.50425	0.132517	0.774211	4.4123	7.19358	18.15	14.1555	12.1742	15.4708	21.6488	20.2144	18.33	11.9277	13.918
chr15:68341257-68341278	MIMAT0000515	mmu-miR-30d-5p	58358	0.254371	0.1705	1.49192	0.135721	0.786486	57720.3	39667.5	55672.4	44133.2	66828.3	62135	59555.8	58543.1	57160.4	78097.5	62424.6
chr1:137966650-137966673	MIMAT0000673	mmu-miR-181b-5p	3087.67	0.361691	0.244215	1.48104	0.138597	0.787996	2865.06	2827.08	2309.32	2959.67	2401.7	2611.12	3220.02	2549.18	3315.29	6215.1	2690.81
chr10:81271610-81271633	MIMAT0014822	mmu-miR-3057-5p	65.4843	-0.411674	0.276777	-1.48739	0.136913	0.787996	73.5384	121.263	71.5322	53.083	59.5184	55.8667	33.8851	73.6382	70.8762	57.2527	49.8728
chr7:128288414-128288434	MIMAT0014937	mmu-miR-3103-5p	1.73316	-1.86604	1.25917	-1.48196	0.138351	0.787996	1.47077	8.22124	1.06765	0	3.38172	0	0	1.44389	0	0	3.4795
chr1:135454603-135454625	MIMAT0022358	mmu-miR-1231-3p	2.6581	-1.05626	0.740001	-1.42738	0.15347	0.791061	2.94154	5.13827	2.13529	3.53886	4.73441	0.859488	1.8825	3.60972	2.44401	0.795177	1.15983
chr1:176772342-176772363	MIMAT0000605	mmu-miR-350-3p	38.6056	0.411272	0.290007	1.41814	0.156149	0.791061	27.9446	26.719	33.097	36.5683	39.228	35.239	58.3576	36.0972	30.5501	68.3852	32.4753
chr1:185242975-185242995	MIMAT0017353	mmu-miR-664-5p	192.558	-0.450081	0.308517	-1.45885	0.144605	0.791061	198.554	419.283	165.485	112.064	231.31	175.336	103.538	181.93	201.631	139.951	189.053
chr11:50069720-50069741	MIMAT0004651	mmu-miR-340-5p	7904.96	0.458233	0.314745	1.45589	0.145424	0.791061	7180.29	1723.38	8226.21	8891.99	6808.76	9162.14	9676.07	9144.14	7753.61	9603.35	8784.58
chr14:115044219-115044240	MIMAT0004627	mmu-miR-20a-3p	2.40606	1.48451	1.03925	1.42845	0.153164	0.791061	2.94154	0	0	1.17962	2.02903	0	1.8825	1.44389	2.44401	8.74694	5.79917
chr16:14159630-14159651	MIMAT0003127	mmu-miR-484	1197.74	0.338017	0.238184	1.41914	0.155857	0.791061	772.153	981.41	1457.34	898.871	1124.09	1117.33	965.725	1136.34	1446.85	2089.72	1185.35
chr16:20604452-20604472	MIMAT0005460	mmu-miR-1224-5p	178.446	-0.338612	0.230929	-1.4663	0.142566	0.791061	164.726	309.324	145.2	187.56	199.522	187.368	180.72	160.271	141.752	111.325	175.135
chr18:24429147-24429168	MIMAT0016997	mmu-miR-187-5p	22.098	-1.70784	1.18557	-1.44053	0.149719	0.791061	0	5.13827	88.6146	82.5735	1.35269	4.29744	8.47127	3.60972	25.6621	19.8794	3.4795
chr2:14261051-14261072	MIMAT0017281	mmu-miR-511-3p	2.28207	1.17048	0.825607	1.41771	0.156274	0.791061	0	2.05531	1.06765	1.17962	2.02903	1.71898	3.76501	2.16583	3.66601	3.97588	3.4795
chr2:38853845-38853868	MIMAT0000673_1	mmu-miR-181b-5p	5301.04	0.352951	0.241846	1.45941	0.144453	0.791061	4943.25	5037.56	4073.07	4772.75	4198.75	4526.92	5570.33	4417.57	5632.21	10633.1	4505.95
chr2:174267058-174267079	MIMAT0004576	mmu-miR-296-3p	15.1177	-0.595992	0.416785	-1.42998	0.152724	0.791061	8.82461	22.6084	27.7588	21.2332	11.4979	5.15693	11.295	7.94138	17.108	14.3132	18.5573
chr3:89227165-89227188	MIMAT0017278	mmu-miR-92b-5p	7.58277	-0.752815	0.518073	-1.4531	0.146195	0.791061	5.88307	5.13827	13.8794	16.5147	7.43979	3.43795	8.47127	5.77555	8.55402	7.15659	1.15983
chr4:40993738-40993758	MIMAT0014910	mmu-miR-3094-3p	1.2024	2.03048	1.40081	1.44951	0.147196	0.791061	0	0	2.13529	0	0	0.859488	1.8825	1.44389	6.11002	0.795177	0
chr4:56895272-56895293	MIMAT0000654	mmu-miR-32-5p	26.365	0.554262	0.383782	1.44421	0.14868	0.791061	14.7077	6.16593	30.9617	35.3886	18.2613	24.0657	41.4151	38.263	19.5521	33.3974	27.836
chr5:139369708-139369730	MIMAT0000584	mmu-miR-339-5p	100.876	0.329273	0.231796	1.42053	0.155454	0.791061	83.8338	81.1847	77.9381	104.986	94.6883	100.56	161.895	88.0771	70.8762	129.614	115.983
chr7:64205831-64205852	MIMAT0000668	mmu-miR-211-5p	11.3842	1.14596	0.782941	1.46366	0.143288	0.791061	4.4123	13.3595	9.60881	0	6.76345	6.01642	28.2376	2.16583	2.44401	42.9395	9.27867
chr7:78888295-78888317	MIMAT0000677_1	mmu-miR-7a-5p	248.773	-0.412251	0.29131	-1.41516	0.15702	0.791061	247.089	179.84	227.408	578.014	206.962	241.516	191.074	174.71	230.959	210.722	248.204
chr8:85062152-85062171	MIMAT0028047	mmu-miR-7070-3p	4.47382	-0.955202	0.656565	-1.45485	0.145711	0.791061	2.94154	12.3319	7.47352	4.71849	2.70538	1.71898	1.8825	1.44389	6.11002	5.56624	2.31967
chrX:19146307-19146329	MIMAT0000669	mmu-miR-221-3p	4668.93	-0.288752	0.195746	-1.47514	0.140175	0.791061	6022.79	6732.17	4483.04	3838.49	4831.81	5654.57	4037.97	4016.89	4153.59	3249.09	4337.78
chrX:53053987-53054008	MIMAT0004790	mmu-miR-503-3p	3.38383	-0.978963	0.685987	-1.42709	0.153555	0.791061	2.94154	7.19358	6.40587	1.17962	5.41076	1.71898	2.82376	2.88777	0	3.18071	3.4795
chrX:105344292-105344313	MIMAT0001076	mmu-miR-384-3p	572.339	0.424098	0.300036	1.41349	0.157512	0.791061	576.541	154.148	652.331	548.524	481.558	647.194	541.22	681.515	570.675	866.743	575.277
chr8:94324359-94324379	MIMAT0016987	mmu-miR-138-2-3p	26.6233	-0.395766	0.280674	-1.41006	0.158523	0.79174	27.9446	32.885	37.3676	30.6702	25.0248	35.239	23.5313	21.6583	14.664	20.6746	23.1967
chr2:32318524-32318545	MIMAT0004667	mmu-miR-199b-3p	85.9324	0.277016	0.197276	1.4042	0.160258	0.792118	54.4184	79.1294	90.7498	75.4958	83.1904	72.197	107.303	92.4088	111.202	89.855	89.3072
chrX:19146941-19146961	MIMAT0017061	mmu-miR-222-5p	78.1473	-0.30232	0.215344	-1.40389	0.160351	0.792118	95.5999	101.738	96.0881	61.3403	80.485	70.478	64.0051	80.1357	90.4282	50.8913	68.4302
chr11:102999848-102999868	MIMAT0027763	mmu-miR-6931-3p	2.34261	-1.12724	0.815892	-1.3816	0.167093	0.793856	1.47077	8.22124	2.13529	1.17962	3.38172	0.859488	1.8825	1.44389	2.44401	1.59035	1.15983
chr11:115447969-115447989	MIMAT0019352	mmu-miR-3968	128.404	-0.523902	0.377689	-1.38712	0.165404	0.793856	269.15	221.973	134.523	55.4422	89.2775	155.567	83.7714	88.799	119.756	59.6383	134.541
chr11:120014781-120014802	MIMAT0000582	mmu-miR-338-3p	3825.43	0.372185	0.269346	1.38181	0.16703	0.793856	3418.06	1769.62	3947.08	4539.18	2808.18	3172.37	3319.8	5089.7	6086.8	4829.9	3099.07
chr11:120014780-120014801	MIMAT0014836	mmu-miR-3065-5p	3825.43	0.372185	0.269346	1.38181	0.16703	0.793856	3418.06	1769.62	3947.08	4539.18	2808.18	3172.37	3319.8	5089.7	6086.8	4829.9	3099.07
chr12:109734145-109734166	MIMAT0000146	mmu-miR-134-5p	285.598	-0.246837	0.179333	-1.37641	0.168693	0.793856	261.797	382.288	258.37	392.814	267.156	284.491	243.784	288.055	228.515	238.553	295.758
chr16:93369775-93369796	MIMAT0017240	mmu-miR-802-3p	3.14563	1.2157	0.878835	1.3833	0.166571	0.793856	0	2.05531	0	2.35924	4.05807	2.57846	4.70626	5.77555	6.11002	0	6.959
chr3:88215652-88215673	MIMAT0000143_1	mmu-miR-9-3p	34.9871	0.392036	0.284292	1.37899	0.167898	0.793856	39.7107	15.4148	22.4205	34.209	37.8753	47.2718	32.9438	31.7655	35.4381	43.7347	44.0737
chr3:88215650-88215670	MIMAT0049835_1	mmu-miR-9b-5p	34.9871	0.392036	0.284292	1.37899	0.167898	0.793856	39.7107	15.4148	22.4205	34.209	37.8753	47.2718	32.9438	31.7655	35.4381	43.7347	44.0737
chr7:61685279-61685300	MIMAT0014808_1	mmu-miR-344d-3p	1.89538	-1.25586	0.914107	-1.37386	0.169485	0.793856	2.94154	3.08296	5.33823	0	2.70538	1.71898	0.941252	2.16583	0	0.795177	1.15983
chr8:71631047-71631067	MIMAT0028041	mmu-miR-6769b-3p	16.4045	-0.519225	0.372379	-1.39434	0.163214	0.793856	23.5323	32.885	10.6765	11.7962	19.614	12.8923	12.2363	12.995	14.664	19.8794	9.27867
chr12:109580243-109580261	MIMAT0017276	mmu-miR-493-5p	60.278	-0.306963	0.224208	-1.3691	0.170969	0.796678	85.3045	47.2721	61.9234	55.4422	85.8958	59.3047	49.8864	49.8141	64.7662	50.0961	53.3523
chr16:42303425-42303446	MIMAT0025585	mmu-miR-6540-5p	112.259	-0.314191	0.231803	-1.35542	0.175282	0.804341	104.425	176.757	139.862	104.986	102.128	97.1221	76.2414	126.34	133.198	91.4453	82.3482
chr7:141620772-141620791	MIMAT0028031	mmu-miR-7063-3p	1.16666	1.62807	1.1978	1.35921	0.17408	0.804341	0	1.02765	0	0	1.35269	2.57846	0.941252	2.16583	1.222	2.38553	1.15983
chr8:88138254-88138274	MIMAT0028049	mmu-miR-7071-3p	0.884315	2.28978	1.68592	1.35818	0.174406	0.804341	0	0	0	1.17962	0	3.43795	0	1.44389	3.66601	0	0
chr8:70102524-70102546	MIMAT0028037	mmu-miR-7066-3p	4.75657	-0.779697	0.580056	-1.34417	0.178892	0.808488	2.94154	7.19358	6.40587	5.89811	8.11614	7.73539	2.82376	2.16583	1.222	3.18071	4.63933
chr8:84208875-84208896	MIMAT0000219_1	mmu-miR-24-3p	3228.76	0.244956	0.18244	1.34266	0.179381	0.808488	3454.83	2789.06	2407.54	2176.4	3834.2	3746.51	3322.62	3382.31	3516.93	2845.14	4040.86
chr8:84208873-84208894	MIMAT0014856_1	mmu-miR-3074-5p	3228.76	0.244956	0.18244	1.34266	0.179381	0.808488	3454.83	2789.06	2407.54	2176.4	3834.2	3746.51	3322.62	3382.31	3516.93	2845.14	4040.86
chr9:41531437-41531458	MIMAT0000655	mmu-miR-100-5p	6211.09	0.343686	0.256198	1.34148	0.179763	0.808488	6043.38	6243	4675.22	3306.48	6812.15	5578.08	4783.44	6267.19	7136.5	6140.36	11336.2
chr12:109743303-109743325	MIMAT0017173	mmu-miR-412-5p	160.504	-0.306169	0.231865	-1.32046	0.186681	0.808902	150.018	251.775	136.659	159.249	196.816	147.832	146.835	167.491	189.41	93.0357	126.422
chr12:109743764-109743784	MIMAT0001091	mmu-miR-410-3p	26890.8	-0.273235	0.207816	-1.31479	0.188579	0.808902	31887.7	19839.9	27275.1	42563.1	26857	27539.7	20371.5	26928.5	27843.3	19209.9	25482.7
chr12:112130889-112130910	MIMAT0004547	mmu-miR-203-5p	2.85268	1.06278	0.808553	1.31443	0.188703	0.808902	0	0	4.27058	2.35924	2.02903	5.15693	6.58877	1.44389	3.66601	2.38553	3.4795
chr12:112130887-112130908	MIMAT0049832	mmu-miR-203b-3p	2.85268	1.06278	0.808553	1.31443	0.188703	0.808902	0	0	4.27058	2.35924	2.02903	5.15693	6.58877	1.44389	3.66601	2.38553	3.4795
chr13:63300718-63300739	MIMAT0004522	mmu-miR-27b-5p	96.5984	-0.266266	0.199556	-1.33429	0.182109	0.808902	114.72	138.733	103.562	74.3161	100.775	100.56	75.3002	88.799	98.9823	91.4453	75.3892
chr16:93369737-93369758	MIMAT0004188	mmu-miR-802-5p	7.48891	0.75451	0.575455	1.31115	0.189806	0.808902	8.82461	4.11062	0	2.35924	11.4979	14.6113	6.58877	8.66332	7.33202	7.95177	10.4385
chr2:10473941-10473962	MIMAT0004885	mmu-miR-467c-5p	10.0577	0.588984	0.44529	1.3227	0.185936	0.808902	7.35384	6.16593	5.33823	7.07773	12.8506	16.3303	8.47127	15.1608	7.33202	7.15659	17.3975
chr4:129684500-129684521	MIMAT0027937	mmu-miR-7016-3p	1.79738	-1.33809	1.02236	-1.30883	0.190593	0.808902	5.88307	4.11062	0	2.35924	1.35269	0	1.8825	2.16583	1.222	0.795177	0
chr5:30170751-30170772	MIMAT0009433	mmu-miR-1960	1.82121	-1.27402	0.965892	-1.319	0.187168	0.808902	2.94154	2.05531	4.27058	3.53886	0.676345	2.57846	0	0	1.222	1.59035	1.15983
chr7:61982295-61982316	MIMAT0014930	mmu-miR-344g-3p	2.22117	-1.26755	0.956448	-1.32527	0.185082	0.808902	5.88307	1.02765	2.13529	7.07773	0.676345	3.43795	1.8825	0.721943	0	1.59035	0
chr8:84178924-84178945	MIMAT0000674	mmu-miR-181c-5p	21558.7	0.32421	0.242362	1.33771	0.18099	0.808902	21335	11911.5	17210.4	24598.6	19714.1	20665.5	24939.4	21781.8	17953.7	37855.2	19180.2
chrX:53049453-53049474	MIMAT0003171	mmu-miR-542-5p	4.10385	-0.803638	0.613786	-1.30931	0.190428	0.808902	4.4123	6.16593	4.27058	5.89811	5.41076	0.859488	4.70626	1.44389	6.11002	2.38553	3.4795
chr11:117077412-117077433	MIMAT0027344	mmu-miR-6516-3p	5.66634	-0.747563	0.575049	-1.3	0.193602	0.813022	13.2369	5.13827	4.27058	3.53886	10.1452	8.59488	1.8825	3.60972	4.88801	2.38553	4.63933
chr14:115044048-115044070	MIMAT0000651	mmu-miR-19a-3p	5.76368	0.678811	0.524051	1.29532	0.195211	0.813022	5.88307	3.08296	3.20294	4.71849	4.73441	5.15693	7.53002	3.60972	9.77603	8.74694	6.959
chr15:101193908-101193929	MIMAT0027825	mmu-miR-6962-3p	1.48889	-1.73912	1.33636	-1.30138	0.193128	0.813022	4.4123	7.19358	0	0	0.676345	2.57846	0	0.721943	0	0.795177	0
chr3:88215186-88215207	MIMAT0014907	mmu-miR-3093-5p	49.5299	-0.38263	0.295549	-1.29464	0.195444	0.813022	41.1815	100.71	41.6382	38.9275	60.1947	37.8175	33.8851	38.263	43.9921	54.8672	53.3523
chrX:147002285-147002303	MIMAT0003894	mmu-miR-764-5p	10.992	-0.733751	0.567542	-1.29286	0.196061	0.813022	2.94154	15.4148	16.0147	31.8498	4.05807	4.29744	5.64751	12.273	14.664	7.95177	5.79917
chr1:137966468-137966490	MIMAT0000210	mmu-miR-181a-5p	318401	0.255112	0.208376	1.22429	0.220845	0.81342	347573	318678	225928	235616	312277	328593	312910	276505	332824	525735	285778
chr1:137966690-137966710	MIMAT0017067	mmu-miR-181b-1-3p	44.7382	0.388123	0.320029	1.21278	0.225216	0.81342	38.24	13.3595	45.9087	40.1071	53.4312	42.1149	47.0626	41.8727	47.6581	77.1322	45.2335
chr10:101772704-101772725	MIMAT0014811	mmu-miR-3059-5p	788.537	0.351127	0.274215	1.28048	0.200376	0.81342	464.763	754.299	806.072	828.094	574.217	526.866	575.105	967.404	1070.47	1385.2	721.416
chr11:4139413-4139434	MIMAT0014827	mmu-miR-3060-3p	18.851	-0.467293	0.390042	-1.19806	0.230894	0.81342	16.1784	45.2168	18.15	20.0536	11.4979	12.8923	10.3538	15.8828	17.108	21.4698	18.5573
chr11:28757058-28757079	MIMAT0017054	mmu-miR-216a-3p	0.750668	-3.25616	2.58122	-1.26148	0.207136	0.81342	0	0	0	8.25735	0	0	0	0	0	0	0
chr11:86584082-86584103	MIMAT0004628	mmu-miR-21a-3p	33.5732	0.540243	0.437758	1.23411	0.21716	0.81342	11.7661	10.2765	42.7058	53.083	16.9086	21.4872	41.4151	50.536	54.9901	42.9395	23.1967
chr11:101030388-101030409	MIMAT0027757	mmu-miR-6928-3p	1.77057	-1.13135	0.924863	-1.22326	0.221232	0.81342	2.94154	3.08296	2.13529	3.53886	1.35269	0.859488	1.8825	2.88777	0	0.795177	0
chr12:108837027-108837048	MIMAT0004656	mmu-miR-345-3p	113.62	-0.274162	0.215153	-1.27426	0.20257	0.81342	117.661	130.512	112.103	180.482	87.9248	92.8247	106.361	94.5746	111.202	128.023	88.1473
chr12:109563710-109563731	MIMAT0004822	mmu-miR-770-5p	64.4792	-0.350443	0.278627	-1.25775	0.208482	0.81342	55.8892	58.5763	75.8028	123.86	51.4022	52.4288	48.0039	68.5846	61.1002	40.554	73.0695
chr12:109580283-109580305	MIMAT0004888	mmu-miR-493-3p	4.20798	0.794922	0.666242	1.19314	0.232814	0.81342	2.94154	3.08296	4.27058	1.17962	3.38172	10.3139	1.8825	4.33166	2.44401	3.18071	9.27867
chr12:109592888-109592909	MIMAT0000139	mmu-miR-127-3p	427937	-0.216907	0.171889	-1.2619	0.206984	0.81342	443826	612042	402578	403583	454000	448586	301190	457324	427327	353045	403805
chr12:109710644-109710665	MIMAT0000377	mmu-miR-299a-5p	10.4383	-0.542794	0.422688	-1.28415	0.19909	0.81342	7.35384	12.3319	13.8794	14.1555	14.8796	14.6113	11.295	5.0536	3.66601	7.15659	10.4385
chr12:109710645-109710662	MIMAT0022837	mmu-miR-299b-3p	10.4383	-0.542794	0.422688	-1.28415	0.19909	0.81342	7.35384	12.3319	13.8794	14.1555	14.8796	14.6113	11.295	5.0536	3.66601	7.15659	10.4385
chr12:109740515-109740536	MIMAT0017079	mmu-miR-377-5p	115.068	-0.351252	0.288344	-1.21817	0.223159	0.81342	101.483	213.752	97.1557	108.525	131.211	138.378	86.5952	143.667	86.7622	59.6383	98.5858
chr12:109743172-109743194	MIMAT0004746	mmu-miR-409-5p	250.678	0.436149	0.368554	1.18341	0.236648	0.81342	233.852	198.337	174.026	179.302	264.451	239.797	190.133	233.188	204.075	132.795	707.498
chr12:117250821-117250843	MIMAT0016992	mmu-miR-153-5p	201.626	-0.215169	0.17234	-1.24852	0.211842	0.81342	230.911	200.393	197.514	238.284	224.547	237.219	162.837	222.359	171.08	149.493	183.254
chr14:30572185-30572207	MIMAT0014861	mmu-miR-3076-3p	6.4651	-0.627123	0.517454	-1.21194	0.225535	0.81342	7.35384	9.24889	4.27058	11.7962	7.43979	1.71898	4.70626	6.49749	2.44401	6.36141	9.27867
chr14:115043908-115043929	MIMAT0004626	mmu-miR-18a-3p	5.90828	0.647111	0.546718	1.18363	0.23656	0.81342	4.4123	2.05531	3.20294	5.89811	6.76345	3.43795	5.64751	6.49749	8.55402	12.7228	5.79917
chr15:82198127-82198147	MIMAT0000667	mmu-miR-33-5p	78.8507	0.421675	0.35438	1.18989	0.234088	0.81342	54.4184	19.5254	103.562	108.525	47.3441	70.478	104.479	110.457	74.5422	85.8791	88.1473
chr16:77598940-77598961	MIMAT0000131	mmu-miR-99a-5p	3114.28	0.323516	0.250991	1.28896	0.197413	0.81342	3013.6	3071.66	2447.04	1651.47	3508.2	2878.43	2389.84	3248.02	3633.02	2941.36	5474.41
chr17:35960731-35960752	MIMAT0004862	mmu-miR-877-3p	105.129	-0.309016	0.245519	-1.25862	0.208168	0.81342	83.8338	193.199	104.629	97.9086	106.862	82.5108	86.5952	77.2479	101.426	122.457	99.7457
chr19:6051371-6051392	MIMAT0027879	mmu-miR-6988-3p	11.0038	-0.540926	0.450076	-1.20186	0.22942	0.81342	10.2954	24.6637	10.6765	7.07773	12.8506	7.73539	5.64751	4.33166	13.442	12.7228	11.5983
chr19:6346523-6346544	MIMAT0027881	mmu-miR-6989-3p	16.3347	-0.445388	0.368363	-1.2091	0.226624	0.81342	23.5323	29.802	17.0823	15.3351	10.1452	12.8923	12.2363	12.273	21.9961	15.1084	9.27867
chr19:6914196-6914216	MIMAT0027883	mmu-miR-6990-3p	1.59829	1.34923	1.13673	1.18695	0.235248	0.81342	1.47077	1.02765	0	1.17962	0.676345	1.71898	0.941252	0	1.222	2.38553	6.959
chr2:10509319-10509340	MIMAT0003479	mmu-miR-669c-5p	30.1955	-0.374733	0.311868	-1.20158	0.229528	0.81342	17.6492	46.2445	23.4882	46.0052	38.5517	30.9416	33.8851	23.1022	15.886	26.2408	30.1557
chr2:28733321-28733343	MIMAT0014898	mmu-miR-3088-3p	1.1874	1.47833	1.24479	1.18762	0.234984	0.81342	0	1.02765	0	1.17962	0.676345	1.71898	0.941252	0	1.222	3.97588	2.31967
chr2:38852741-38852763	MIMAT0000210_1	mmu-miR-181a-5p	95284.1	0.261312	0.209393	1.24795	0.21205	0.81342	103638	95319.1	67395.1	70108.4	93402.6	98394.2	93784.5	83023.5	100159	157945	84955.5
chr3:69009813-69009834	MIMAT0004521	mmu-miR-15b-3p	6.06905	0.716756	0.604771	1.18517	0.235951	0.81342	0	4.11062	9.60881	1.17962	6.76345	8.59488	12.2363	3.60972	6.11002	8.74694	5.79917
chr3:157544324-157544345	MIMAT0004540	mmu-miR-186-3p	6.53232	-0.703764	0.572808	-1.22862	0.219213	0.81342	7.35384	3.08296	6.40587	15.3351	9.46883	2.57846	9.41252	3.60972	1.222	8.74694	4.63933
chr4:101346957-101346977	MIMAT0000133	mmu-miR-101a-3p	17885.3	0.429193	0.344589	1.24552	0.212941	0.81342	15159.2	3930.78	18527.9	24556.2	13039.3	16679.2	22718.1	20084.5	15244.5	27277	19522.3
chr5:35021094-35021115	MIMAT0014916	mmu-miR-3097-3p	1.18644	-1.48023	1.19319	-1.24056	0.214767	0.81342	4.4123	1.02765	0	2.35924	1.35269	0	0	0.721943	1.222	0.795177	1.15983
chr5:48224005-48224026	MIMAT0004665	mmu-miR-218-1-3p	40.9204	-0.327219	0.267593	-1.22283	0.221396	0.81342	41.1815	48.2998	50.1793	36.5683	52.7549	40.3959	25.4138	42.5947	57.4341	28.6264	26.6762
chr5:111004208-111004227	MIMAT0017257	mmu-miR-701-3p	0.737567	-1.94878	1.54618	-1.26038	0.207533	0.81342	1.47077	2.05531	0	0	2.70538	0	0	0.721943	0	0	1.15983
chr6:3721922-3721944	MIMAT0003112	mmu-miR-489-3p	1.04891	-2.47934	1.94319	-1.27591	0.201988	0.81342	0	0	0	9.43697	0	0	0.941252	0	0	0	1.15983
chr6:30741354-30741375	MIMAT0004704	mmu-miR-335-3p	1490.09	-0.273962	0.223325	-1.22674	0.21992	0.81342	1835.52	1205.44	1591.86	1853.19	1740.24	1701.79	1234.92	1444.61	1360.09	742.695	1680.6
chr6:116645978-116645998	MIMAT0027991	mmu-miR-7043-3p	4.22827	0.847657	0.715142	1.1853	0.235899	0.81342	2.94154	2.05531	2.13529	3.53886	4.05807	4.29744	4.70626	1.44389	1.222	14.3132	5.79917
chr7:81529919-81529940	MIMAT0009456	mmu-miR-1839-5p	1551.39	-0.155927	0.129877	-1.20057	0.229919	0.81342	2048.78	1609.31	1512.85	1447.4	1599.56	1541.92	1396.82	1526.91	1531.17	1333.51	1517.06
chr8:123105023-123105043	MIMAT0028065	mmu-miR-7079-3p	1.96292	-1.0559	0.857438	-1.23146	0.218152	0.81342	2.94154	3.08296	3.20294	1.17962	3.38172	0.859488	0.941252	2.88777	0	0.795177	2.31967
chr9:20914091-20914112	MIMAT0028069	mmu-miR-7081-3p	0.728414	-1.92988	1.61004	-1.19865	0.230663	0.81342	0	4.11062	1.06765	1.17962	0	0.859488	0	0	0	0.795177	0
chr9:41581980-41582001	MIMAT0004669	mmu-miR-125b-1-3p	948.692	-0.292602	0.242051	-1.20884	0.226723	0.81342	1011.89	1658.63	969.422	686.54	943.501	711.656	639.11	803.523	1195.12	865.152	951.063
chrX:7241270-7241291	MIMAT0003509	mmu-miR-501-3p	164.528	0.385833	0.311428	1.23891	0.215378	0.81342	125.015	168.535	104.629	145.093	160.294	152.129	175.073	117.677	111.202	168.577	381.585
chrX:59097705-59097726	MIMAT0004889	mmu-miR-504-5p	23.7955	-0.471862	0.369883	-1.27571	0.202059	0.81342	14.7077	56.521	21.3529	29.4905	17.585	18.9087	21.6488	13.7169	23.2181	19.0842	25.5163
chrX:100381151-100381171	MIMAT0003782	mmu-miR-676-3p	1355.63	-0.254602	0.214333	-1.18788	0.23488	0.81342	1307.51	2397.52	1324.95	1271.63	1132.2	1110.46	1011.85	1228.03	1375.98	1382.02	1369.76
chrX:103572930-103572952	MIMAT0004869	mmu-miR-421-3p	1210.93	-0.155308	0.123192	-1.26071	0.207415	0.81342	1294.28	1128.36	1395.41	1301.12	1291.82	1214.46	950.665	1156.55	1286.77	1136.31	1164.47
chrX:142739060-142739080	MIMAT0003711	mmu-miR-652-3p	534.79	-0.254037	0.214183	-1.18608	0.235592	0.81342	379.458	583.708	559.446	907.129	501.848	540.618	496.04	397.069	502.243	500.166	514.966
chr19:22750610-22750631	MIMAT0000237	mmu-miR-204-5p	8773.63	0.446012	0.378834	1.17733	0.239065	0.818617	4129.92	10632.1	7576.01	10018.5	4273.82	7891.82	10555.2	4644.26	6080.69	21432.4	9275.19
chr7:7298891-7298913	MIMAT0022367	mmu-miR-5620-5p	3.0882	-0.997258	0.849427	-1.17404	0.24038	0.820014	0	7.19358	4.27058	5.89811	4.05807	3.43795	2.82376	0.721943	0	5.56624	0
chr1:162217883-162217904	MIMAT0000230	mmu-miR-199a-3p	173.214	0.262979	0.231912	1.13396	0.256811	0.820967	101.483	183.95	175.094	134.477	183.289	130.642	238.137	194.925	207.741	137.566	218.049
chr1:184822409-184822429	MIMAT0017351	mmu-miR-1981-3p	188.922	-0.328308	0.292044	-1.12417	0.26094	0.820967	200.024	357.624	162.282	96.7289	244.837	211.434	128.01	160.993	184.522	139.156	192.532
chr10:92137190-92137210	MIMAT0014824	mmu-miR-1251-5p	18.654	-0.552985	0.479629	-1.15294	0.248934	0.820967	11.7661	8.22124	30.9617	46.0052	15.5559	16.3303	21.6488	9.38526	13.442	6.36141	25.5163
chr10:122985698-122985719	MIMAT0000122	mmu-let-7i-5p	23896.5	-0.169626	0.152463	-1.11258	0.26589	0.820967	27416.6	30433	26496.8	20667	22164.5	22756.7	19476.4	21516.8	26449	25063.2	20421.2
chr11:28763798-28763820	MIMAT0017072	mmu-miR-217-3p	0.743487	-1.79604	1.61084	-1.11497	0.264863	0.820967	1.47077	0	1.06765	3.53886	0	0	0.941252	0	0	0	1.15983
chr11:70012060-70012082	MIMAT0000555	mmu-miR-324-5p	251.118	0.238233	0.212209	1.12263	0.261594	0.820967	158.843	156.204	226.341	320.857	280.007	260.425	304.966	277.226	259.065	263.204	255.163
chr12:109585818-109585839	MIMAT0004644	mmu-miR-337-5p	695.54	-0.246902	0.216693	-1.13941	0.254533	0.820967	741.267	1061.57	517.808	680.641	802.145	724.548	707.822	712.558	635.442	409.516	657.626
chr12:109585813-109585834	MIMAT0022354	mmu-miR-3544-3p	695.54	-0.246902	0.216693	-1.13941	0.254533	0.820967	741.267	1061.57	517.808	680.641	802.145	724.548	707.822	712.558	635.442	409.516	657.626
chr12:109712396-109712416	MIMAT0005858	mmu-miR-1197-3p	13.7271	0.432043	0.372276	1.16055	0.245826	0.820967	7.35384	7.19358	12.8117	14.1555	15.5559	18.0492	16.9425	20.9364	12.22	9.54212	16.2377
chr12:109720020-109720044	MIMAT0017239	mmu-miR-667-5p	18.899	-0.441702	0.395948	-1.11555	0.264613	0.820967	10.2954	42.1338	18.15	20.0536	19.614	18.0492	21.6488	22.3802	17.108	10.3373	8.11883
chr13:24980056-24980077	MIMAT0049833	mmu-miR-12184-5p	1.29427	-1.23196	1.10809	-1.11178	0.266232	0.820967	1.47077	2.05531	3.20294	1.17962	1.35269	0	0.941252	0	2.44401	1.59035	0
chr14:54975710-54975731	MIMAT0004939	mmu-miR-208b-3p	8.54297	0.567807	0.513479	1.1058	0.268812	0.820967	4.4123	3.08296	10.6765	11.7962	4.05807	7.73539	2.82376	10.8292	13.442	13.518	11.5983
chr17:17830194-17830215	MIMAT0000132	mmu-miR-99b-5p	16826.1	0.303718	0.272421	1.11489	0.264899	0.820967	12126.5	22397.7	12587.5	10831.3	16651.6	14460.9	13790.3	13077.3	16240.4	23011.6	29912.1
chr17:46553827-46553847	MIMAT0027855	mmu-miR-6976-3p	1.72068	-1.11542	0.999634	-1.11583	0.264494	0.820967	1.47077	6.16593	1.06765	1.17962	2.02903	0	1.8825	0	1.222	1.59035	2.31967
chr18:61649199-61649219	MIMAT0000247	mmu-miR-143-3p	79519.7	0.238519	0.20896	1.14146	0.25368	0.820967	64500.5	49729.2	108142	62517.6	77200.7	75065.1	88634	87611.4	73981.3	79712.5	107622
chr19:6264857-6264877	MIMAT0000517	mmu-miR-192-5p	6642.62	0.229284	0.20109	1.1402	0.254202	0.820967	5908.07	3621.46	7254.65	6128.13	7447.23	6828.63	5576.92	6905.39	7727.95	8384.34	7286.07
chr2:26591402-26591423	MIMAT0000138	mmu-miR-126a-3p	4057.57	0.195412	0.17412	1.12228	0.261742	0.820967	3851.94	3105.57	3862.74	2991.52	4986.69	4265.64	4836.15	4707.07	3830.98	3486.06	4708.92
chr2:26591399-26591420	MIMAT0029894	mmu-miR-126b-5p	4057.9	0.195251	0.174089	1.12156	0.262051	0.820967	3851.94	3107.63	3862.74	2991.52	4987.37	4266.5	4836.15	4707.07	3830.98	3486.06	4708.92
chr2:94241376-94241397	MIMAT0000544	mmu-miR-129-2-3p	2117.17	-0.333612	0.301248	-1.10743	0.268107	0.820967	2457.65	4055.13	1628.16	1837.85	1950.58	3200.73	1982.28	1575.28	1433.41	1129.95	2037.83
chr2:94241378-94241399	MIMAT0029862	mmu-miR-129b-5p	2120.16	-0.333017	0.300733	-1.10735	0.268142	0.820967	2460.59	4056.15	1632.43	1841.39	1953.28	3203.31	1986.04	1581.06	1434.63	1133.92	2038.99
chr3:29416840-29416862	MIMAT0017236	mmu-miR-551b-5p	6.63639	-0.589746	0.523629	-1.12627	0.260052	0.820967	11.7661	12.3319	6.40587	1.17962	8.79248	4.29744	3.76501	6.49749	8.55402	4.77106	4.63933
chr6:36421800-36421821	MIMAT0003780	mmu-miR-490-3p	408.706	0.4422	0.382751	1.15532	0.24796	0.820967	272.092	350.43	257.302	546.165	284.065	362.704	485.686	347.977	226.071	1109.27	254.004
chr7:61735539-61735560	MIMAT0014924	mmu-miR-344e-3p	0.937229	-1.67317	1.48848	-1.12408	0.260979	0.820967	2.94154	0	3.20294	0	1.35269	0	0	0	1.222	1.59035	0
chr7:79505318-79505339	MIMAT0000143_2	mmu-miR-9-3p	1689.6	0.278314	0.247182	1.12595	0.260187	0.820967	2201.74	781.018	1318.54	1428.52	1841.01	1957.91	1922.04	1715.34	1363.76	2274.21	1781.5
chr7:79505316-79505336	MIMAT0049835_2	mmu-miR-9b-5p	1689.7	0.278111	0.247156	1.12524	0.260486	0.820967	2201.74	781.018	1319.61	1428.52	1841.01	1957.91	1922.04	1715.34	1363.76	2274.21	1781.5
chr7:96249496-96249517	MIMAT0003498	mmu-miR-708-3p	2714.82	0.310165	0.265549	1.16802	0.242799	0.820967	2169.38	1067.73	3041.72	3410.29	2315.13	2509.7	2812.46	2838.68	2848.49	4111.06	2738.37
chr7:101475418-101475439	MIMAT0004662	mmu-miR-139-3p	58.1862	-0.380365	0.327095	-1.16286	0.244887	0.820967	38.24	110.987	64.0587	57.8014	60.1947	32.6605	48.9451	49.0922	72.0982	29.4215	76.549
chr9:110281353-110281371	MIMAT0024857	mmu-miR-6236	691.473	0.533958	0.475141	1.12379	0.261103	0.820967	1029.54	639.201	658.737	312.6	139.327	1261.73	866.893	367.469	874.954	229.806	1225.94
chrX:7237730-7237754	MIMAT0017258	mmu-miR-500-5p	0.876314	1.61394	1.41609	1.13972	0.254405	0.820967	1.47077	0	0	0	0.676345	1.71898	0	2.16583	1.222	2.38553	0
chrX:7237695-7237716	MIMAT0003507	mmu-miR-500-3p	42.3315	0.34685	0.309805	1.11958	0.262894	0.820967	30.8861	31.8573	30.9617	58.9811	32.4646	50.7098	67.7702	38.263	21.9961	58.8431	42.9138
chrX:147158281-147158302	MIMAT0001533	mmu-miR-448-3p	66.5936	-0.575136	0.514962	-1.11685	0.264058	0.820967	32.3569	33.9126	127.05	184.021	28.4065	34.3795	28.2376	74.3602	108.758	50.8913	30.1557
chr12:109747928-109747949	MIMAT0014853	mmu-miR-3072-3p	15.5108	-0.392644	0.355852	-1.10339	0.269856	0.821381	8.82461	26.719	14.947	18.8739	19.614	10.3139	12.2363	19.4925	9.77603	15.9035	13.918
chr1:132198103-132198125	MIMAT0000612	mmu-miR-135b-5p	174.67	0.294209	0.268049	1.09759	0.272382	0.826286	185.317	70.9082	151.606	159.249	210.343	270.739	200.487	168.935	144.196	169.373	190.213
chr1:93346097-93346118	MIMAT0027704	mmu-miR-6902-5p	0.905099	1.58982	1.46284	1.08681	0.277122	0.826982	1.47077	0	0	0	0.676345	0	0	0.721943	1.222	2.38553	3.4795
chr12:109727382-109727403	MIMAT0003184	mmu-miR-487b-3p	1455.02	-0.186896	0.172644	-1.08255	0.279009	0.826982	1431.06	1215.72	1689.01	2169.32	1287.76	1266.89	1484.35	1353.64	1330.76	1459.15	1317.57
chr15:84951545-84951566	MIMAT0010560	mmu-miR-1249-3p	984.26	-0.311409	0.285939	-1.08908	0.27612	0.826982	797.156	1528.12	887.213	1506.38	785.236	490.768	811.359	877.161	1233	1226.16	684.302
chr19:60774370-60774391	MIMAT0014876_1	mmu-miR-3084-5p	1.89737	1.01148	0.924658	1.09389	0.274001	0.826982	1.47077	1.02765	1.06765	1.17962	1.35269	4.29744	2.82376	2.88777	2.44401	0	2.31967
chr6:31063025-31063047	MIMAT0000127_1	mmu-miR-29b-3p	153.479	0.372487	0.344088	1.08253	0.279015	0.826982	129.428	32.885	187.906	198.176	113.626	171.898	207.075	193.481	136.864	178.915	138.02
chr7:29773344-29773365	MIMAT0009437	mmu-miR-1964-3p	11.6933	-0.440481	0.406113	-1.08463	0.278087	0.826982	13.2369	15.4148	9.60881	12.9758	16.9086	5.15693	6.58877	10.1072	12.22	18.2891	8.11883
chr8:70925541-70925563	MIMAT0009442	mmu-miR-1969	4.34819	-0.662297	0.608082	-1.08916	0.276085	0.826982	5.88307	7.19358	6.40587	4.71849	2.70538	3.43795	1.8825	2.16583	4.88801	1.59035	6.959
chr1:34117364-34117385	MIMAT0027692	mmu-miR-6896-5p	7.34763	0.510327	0.481734	1.05935	0.289438	0.827688	7.35384	5.13827	2.13529	8.25735	6.76345	5.15693	5.64751	8.66332	10.998	7.95177	12.7582
chr1:74394360-74394381	MIMAT0004630	mmu-miR-26b-3p	25.865	0.349722	0.341206	1.02496	0.305382	0.827688	17.6492	11.3042	29.8941	35.3886	18.9377	28.3631	43.2976	26.7119	18.33	32.6022	22.0368
chr1:159340400-159340419	MIMAT0019346	mmu-miR-1843b-3p	738.622	-0.38785	0.372297	-1.04178	0.297516	0.827688	882.461	1371.92	862.657	219.41	900.891	652.351	307.789	761.65	839.516	494.6	831.601
chr1:195037600-195037621	MIMAT0000536	mmu-miR-29c-3p	4149.55	0.219951	0.216566	1.01563	0.309806	0.827688	4306.41	1944.32	4192.64	4388.19	4206.87	4213.21	5219.24	4833.41	3675.79	4266.92	4398.09
chr10:81104614-81104635	MIMAT0022356	mmu-miR-5615-3p	5.40242	0.572169	0.553491	1.03375	0.301255	0.827688	7.35384	3.08296	3.20294	3.53886	4.73441	9.45437	6.58877	6.49749	1.222	7.95177	5.79917
chr10:81104616-81104637	MIMAT0022355_1	mmu-miR-5615-5p	5.40242	0.572169	0.553491	1.03375	0.301255	0.827688	7.35384	3.08296	3.20294	3.53886	4.73441	9.45437	6.58877	6.49749	1.222	7.95177	5.79917
chr11:35616882-35616903	MIMAT0005444	mmu-miR-218-2-3p	17.5448	-0.364839	0.352439	-1.03518	0.300583	0.827688	17.6492	21.5808	28.8264	14.1555	18.2613	21.4872	13.1775	23.8241	9.77603	10.3373	13.918
chr11:69663055-69663077	MIMAT0009398	mmu-miR-1934-5p	2.82405	-0.874806	0.844767	-1.03556	0.300408	0.827688	2.94154	10.2765	2.13529	2.35924	1.35269	0.859488	3.76501	1.44389	0	4.77106	1.15983
chr11:70235100-70235121	MIMAT0017000	mmu-miR-195a-3p	52.3548	0.268087	0.268809	0.997315	0.318612	0.827688	39.7107	64.7423	45.9087	30.6702	54.1076	51.5693	52.7101	52.7019	45.2141	89.855	48.713
chr11:78073047-78073066	MIMAT0000156	mmu-miR-144-3p	172.974	0.776644	0.727969	1.06686	0.286033	0.827688	39.7107	15.4148	291.467	171.045	104.833	63.6021	544.985	147.276	237.069	142.337	144.979
chr11:79726428-79726450	MIMAT0017179	mmu-miR-365-2-5p	1.63153	-1.0231	1.00595	-1.01704	0.309133	0.827688	1.47077	5.13827	3.20294	1.17962	0.676345	0.859488	0.941252	2.88777	0	1.59035	0
chr11:86584120-86584141	MIMAT0000530	mmu-miR-21a-5p	4990.29	0.252787	0.243861	1.0366	0.299921	0.827688	5149.16	1958.71	5289.11	5791.94	4403.68	5125.13	5291.72	5374.87	5755.63	6104.57	4648.61
chr11:87756906-87756925	MIMAT0031402	mmu-miR-142b	62.3366	0.385588	0.389865	0.989028	0.32265	0.827688	60.3015	11.3042	81.141	70.7773	43.9624	44.6934	115.774	64.9749	73.3202	55.6624	63.7908
chr11:87756903-87756925	MIMAT0000155	mmu-miR-142a-3p	62.3366	0.385588	0.389865	0.989028	0.32265	0.827688	60.3015	11.3042	81.141	70.7773	43.9624	44.6934	115.774	64.9749	73.3202	55.6624	63.7908
chr11:121387145-121387166	MIMAT0028441	mmu-miR-7236-3p	19.815	-0.311993	0.29558	-1.05553	0.291183	0.827688	27.9446	20.5531	26.6911	14.1555	21.643	20.6277	17.8838	13.7169	17.108	19.0842	18.5573
chr12:105031117-105031140	MIMAT0014844	mmu-miR-3069-5p	6.98562	-0.550491	0.522541	-1.05349	0.292117	0.827688	10.2954	4.11062	6.40587	12.9758	8.79248	6.8759	11.295	6.49749	4.88801	2.38553	2.31967
chr12:109586085-109586107	MIMAT0004786	mmu-miR-540-5p	92.808	0.390223	0.385834	1.01137	0.311838	0.827688	54.4184	20.5531	144.132	100.268	77.1033	68.759	111.068	136.447	108.758	65.9997	133.381
chr12:109586368-109586387	MIMAT0003733	mmu-miR-665-3p	35.9457	0.382321	0.356539	1.07231	0.28358	0.827688	10.2954	16.4425	52.3146	44.8256	29.7592	34.3795	32.9438	50.536	36.6601	37.3733	49.8728
chr12:109723824-109723844	MIMAT0000740	mmu-miR-376a-3p	269.765	0.350045	0.347456	1.00745	0.313718	0.827688	239.735	50.3551	303.211	337.372	242.808	301.68	361.441	330.65	261.509	241.734	296.917
chr13:63301249-63301270	MIMAT0014856	mmu-miR-3074-5p	433.515	0.187005	0.175374	1.06632	0.286281	0.827688	469.175	397.702	329.902	306.702	510.64	487.33	451.801	474.317	446.031	380.095	514.966
chr13:63301251-63301272	MIMAT0000219	mmu-miR-24-3p	433.737	0.188265	0.17531	1.0739	0.282869	0.827688	469.175	397.702	329.902	306.702	510.64	487.33	451.801	474.317	448.475	380.095	514.966
chr13:83738858-83738879	MIMAT0000143	mmu-miR-9-3p	159.558	0.226151	0.228451	0.989929	0.322209	0.827688	173.551	81.1847	129.185	159.249	187.348	171.898	179.779	160.993	127.088	202.77	182.094
chr13:83738856-83738876	MIMAT0049835	mmu-miR-9b-5p	159.558	0.226151	0.228451	0.989929	0.322209	0.827688	173.551	81.1847	129.185	159.249	187.348	171.898	179.779	160.993	127.088	202.77	182.094
chr14:61631936-61631957	MIMAT0000527	mmu-miR-16-5p	19913.9	0.207571	0.202662	1.02422	0.30573	0.827688	21952.7	20000.2	16007.2	11168.7	22690.7	21821.5	18840.1	20168.2	19514.2	26993.9	19895.8
chr14:63727199-63727221	MIMAT0017283	mmu-miR-598-5p	1.6991	-0.945793	0.927861	-1.01933	0.308048	0.827688	1.47077	3.08296	1.06765	4.71849	1.35269	0.859488	0	2.16583	1.222	1.59035	1.15983
chr16:18327405-18327425	MIMAT0016996	mmu-miR-185-3p	28.5762	-0.289939	0.274065	-1.05792	0.290092	0.827688	23.5323	26.719	28.8264	43.646	35.8463	23.2062	27.2963	36.0972	25.6621	21.4698	22.0368
chr16:77598977-77598997	MIMAT0016981	mmu-miR-99a-3p	125.225	0.315331	0.306842	1.02767	0.304107	0.827688	83.8338	38.0232	139.862	172.225	118.36	111.733	158.13	155.218	138.086	121.662	140.34
chr17:35244116-35244135	MIMAT0027853	mmu-miR-6975-3p	2.33556	0.828243	0.837347	0.989127	0.322601	0.827688	1.47077	1.02765	3.20294	1.17962	1.35269	2.57846	3.76501	0.721943	3.66601	5.56624	1.15983
chr18:12714825-12714845	MIMAT0017344	mmu-miR-1948-5p	1.38278	1.12616	1.07218	1.05034	0.293562	0.827688	1.47077	0	1.06765	1.17962	0.676345	1.71898	2.82376	1.44389	2.44401	2.38553	0
chr18:35554612-35554635	MIMAT0009416	mmu-miR-1949	1.40954	-1.12222	1.11955	-1.00238	0.316159	0.827688	4.4123	0	1.06765	1.17962	3.38172	2.57846	0.941252	0.721943	1.222	0	0
chr19:29135338-29135356	MIMAT0000616	mmu-miR-101b-3p	4098.76	0.348103	0.337229	1.03224	0.301958	0.827688	3357.76	1064.65	4441.4	6025.51	2950.22	3747.37	5030.99	4444.28	3504.71	6378.91	4140.61
chr2:10467537-10467558	MIMAT0005853	mmu-miR-669e-5p	0.861367	-1.48363	1.44745	-1.025	0.305363	0.827688	0	1.02765	3.20294	2.35924	0	0	0.941252	0.721943	1.222	0	0
chr2:10471658-10471679	MIMAT0005833_1	mmu-miR-669d-5p	1.80676	-0.876708	0.890678	-0.984315	0.324961	0.827688	1.47077	1.02765	5.33823	2.35924	2.02903	1.71898	0.941252	1.44389	0	2.38553	1.15983
chr2:158243542-158243565	MIMAT0029896	mmu-miR-7685-5p	0.805506	1.37214	1.39085	0.986545	0.323866	0.827688	1.47077	0	0	0	0.676345	0.859488	0	0.721943	1.222	1.59035	2.31967
chr2:180398437-180398458	MIMAT0000145_1	mmu-miR-133a-3p	90.9682	-0.252979	0.254065	-0.995724	0.319384	0.827688	123.544	116.125	81.141	63.6996	114.979	101.42	105.42	102.516	54.9901	68.3852	68.4302
chr3:17795685-17795706	MIMAT0049857	mmu-miR-124b-3p	90.3145	0.185943	0.189121	0.983198	0.32551	0.827688	83.8338	90.4336	74.7352	93.1901	79.1324	95.4032	120.48	90.2429	70.8762	108.144	86.9875
chr3:29416879-29416899	MIMAT0003890	mmu-miR-551b-3p	135.613	0.264892	0.269508	0.98287	0.325671	0.827688	120.603	72.9635	138.794	153.351	126.477	183.071	160.954	214.417	90.4282	121.662	109.024
chr3:69009918-69009939	MIMAT0000527_1	mmu-miR-16-5p	3547.31	0.20146	0.205088	0.982309	0.325948	0.827688	3987.25	3532.05	2844.21	1969.97	4062.8	3889.18	3409.22	3625.6	3470.49	4771.06	3458.62
chr4:150068473-150068494	MIMAT0000542	mmu-miR-34a-5p	227.274	-0.311598	0.294056	-1.05966	0.289301	0.827688	319.157	213.752	177.229	194.638	365.903	318.87	198.604	223.802	201.631	96.2164	190.213
chr5:138165370-138165391	MIMAT0017049	mmu-miR-25-5p	6.69819	-0.479857	0.484925	-0.989549	0.322395	0.827688	4.4123	12.3319	6.40587	8.25735	7.43979	5.15693	3.76501	3.60972	9.77603	5.56624	6.959
chr6:29022667-29022688	MIMAT0016994	mmu-miR-129-1-3p	413.445	-0.302844	0.306678	-0.9875	0.323397	0.827688	413.286	820.069	324.564	342.09	405.131	630.864	400.973	303.938	295.725	225.035	386.225
chr6:31062711-31062732	MIMAT0004631	mmu-miR-29a-5p	69.693	0.300937	0.305554	0.984892	0.324677	0.827688	72.0676	30.8296	52.3146	102.627	52.7549	71.3375	117.657	62.8091	56.2121	81.9032	66.1105
chr6:31062673-31062694	MIMAT0000535	mmu-miR-29a-3p	17533.1	0.198806	0.197926	1.00445	0.315163	0.827688	18194.9	9182.1	17274.5	18257	18220.1	17760.5	21496.3	20000	15310.5	18524.4	18644.3
chr6:31063067-31063088	MIMAT0004523	mmu-miR-29b-1-5p	6.37016	0.532151	0.51855	1.02623	0.304784	0.827688	5.88307	8.22124	2.13529	2.35924	6.76345	8.59488	10.3538	5.77555	8.55402	7.95177	3.4795
chr7:100882307-100882329	MIMAT0014936	mmu-miR-3102-3p	179.068	-0.263714	0.259153	-1.0176	0.308868	0.827688	136.781	286.716	124.914	264.235	172.468	190.806	167.543	122.73	140.53	209.927	153.098
chr8:121978065-121978086	MIMAT0028443	mmu-miR-7237-3p	4.19457	0.648114	0.629518	1.02954	0.303226	0.827688	5.88307	3.08296	5.33823	0	2.02903	4.29744	4.70626	5.77555	4.88801	3.18071	6.959
chrX:7241307-7241328	MIMAT0003508	mmu-miR-501-5p	3.54224	-0.650521	0.616722	-1.05481	0.291514	0.827688	2.94154	5.13827	4.27058	5.89811	4.05807	4.29744	2.82376	3.60972	1.222	2.38553	2.31967
chrX:7247992-7248012	MIMAT0004541	mmu-miR-188-3p	6.45985	0.645265	0.60095	1.07374	0.282939	0.827688	7.35384	0	4.27058	3.53886	9.46883	11.1733	8.47127	7.21943	6.11002	11.1325	2.31967
chrX:7248456-7248477	MIMAT0002889	mmu-miR-532-5p	1174.35	-0.152481	0.154236	-0.988626	0.322846	0.827688	1198.68	1107.81	1080.46	1680.96	1145.05	1151.71	1089.97	1060.53	997.155	1231.73	1173.75
chrX:72261085-72261105	MIMAT0000671	mmu-miR-224-5p	3.0072	1.17168	1.18832	0.986002	0.324132	0.827688	1.47077	1.02765	4.27058	2.35924	0	0	6.58877	0	0	12.7228	4.63933
chrX:113074827-113074851	MIMAT0017075	mmu-miR-361-3p	414.163	-0.191144	0.194169	-0.984424	0.324907	0.827688	338.277	648.45	354.458	410.508	468.707	412.554	402.856	388.406	320.165	430.986	380.425
chrX:53049415-53049436	MIMAT0003172	mmu-miR-542-3p	30.6484	0.297265	0.303199	0.980427	0.326875	0.827718	41.1815	12.3319	25.6235	24.772	32.4646	25.7846	34.8263	31.7655	31.7721	30.2167	46.3933
chr19:6264658-6264679	MIMAT0000224_1	mmu-miR-194-5p	294.899	0.19354	0.200308	0.966214	0.333937	0.841929	241.206	183.95	302.144	332.653	307.737	325.746	285.199	309.714	245.623	409.516	300.397
chr3:17795686-17795707	MIMAT0004527_2	mmu-miR-124-5p	82.166	0.183404	0.189979	0.965389	0.33435	0.841929	75.0092	86.323	59.7881	84.9327	77.1033	91.9652	107.303	83.0235	69.6542	89.855	78.8687
chr5:24592171-24592191	MIMAT0004821	mmu-miR-671-3p	852.871	-0.241824	0.251636	-0.961007	0.336549	0.845111	1001.59	1373.97	894.687	490.722	894.804	789.869	592.989	878.605	1082.69	710.093	671.544
chrX:147064970-147064991	MIMAT0014810	mmu-miR-1298-3p	414.475	-0.468362	0.488888	-0.958014	0.338055	0.846543	189.729	288.771	837.034	916.566	208.991	199.401	166.602	383.352	860.29	297.396	211.09
chr1:195037091-195037113	MIMAT0000127	mmu-miR-29b-3p	713.13	0.327464	0.343339	0.953761	0.340204	0.847231	661.845	152.093	885.078	881.177	551.221	796.745	966.666	902.429	573.119	738.719	735.334
chr11:87756867-87756887	MIMAT0000154	mmu-miR-142a-5p	1366.5	0.25136	0.263116	0.955323	0.339415	0.847231	1064.84	677.225	1993.29	954.314	1498.78	1107.02	1705.55	1461.21	1688.81	1227.75	1652.76
chr1:128202369-128202389	MIMAT0016982	mmu-miR-128-1-5p	1811.29	-0.28795	0.305455	-0.942692	0.345839	0.850216	1892.88	3049.05	1673	824.555	2607.31	1903.77	1354.46	1885.72	2068.85	967.73	1696.84
chr10:92072141-92072163	MIMAT0000147	mmu-miR-135a-5p	246.536	0.250576	0.266322	0.940876	0.346768	0.850216	292.683	107.904	176.161	244.182	296.239	366.142	253.197	229.578	233.403	215.493	296.917
chr11:75173723-75173744	MIMAT0000144	mmu-miR-132-3p	16000.1	-0.223227	0.236552	-0.943671	0.345338	0.850216	18106.6	24605.1	12105	11089.6	20879.4	18962	17526.1	13013	13787.9	11619.9	14306.5
chr11:77078086-77078108	MIMAT0003454	mmu-miR-423-3p	439.014	-0.18283	0.196259	-0.931573	0.351557	0.850216	480.941	589.874	499.658	409.329	367.932	286.209	405.68	410.064	518.129	489.034	372.307
chr19:6914261-6914281	MIMAT0027882	mmu-miR-6990-5p	2.29617	-0.815672	0.875654	-0.931501	0.351595	0.850216	0	2.05531	4.27058	4.71849	4.05807	4.29744	2.82376	1.44389	0	1.59035	0
chr4:101346993-101347014	MIMAT0004526	mmu-miR-101a-5p	67.7898	0.292634	0.312421	0.936666	0.34893	0.850216	70.5969	18.4978	75.8028	74.3161	63.5764	67.8995	82.8302	84.4674	47.6581	83.4936	76.549
chr5:9375714-9375734	MIMAT0004842	mmu-miR-879-5p	1166.71	0.380495	0.402258	0.945899	0.3442	0.850216	713.322	181.895	1694.35	1570.08	849.489	923.09	1563.42	1568.78	1208.56	1158.57	1402.24
chr7:29906509-29906532	MIMAT0029842	mmu-miR-7668-5p	1.0784	-1.14192	1.22598	-0.931433	0.351629	0.850216	0	4.11062	0	2.35924	1.35269	0.859488	0.941252	1.44389	0	0.795177	0
chr9:21809975-21809995	MIMAT0028072	mmu-miR-7083-5p	1.31469	-0.994635	1.06812	-0.931203	0.351749	0.850216	0	2.05531	3.20294	2.35924	1.35269	0.859488	0	0.721943	0	1.59035	2.31967
chr9:119031811-119031832	MIMAT0000533_1	mmu-miR-26a-5p	49729	0.154093	0.165223	0.932639	0.351007	0.850216	57208.5	43205.7	46510.9	35119.7	52198.9	50057.4	48828.4	50763.5	48484.2	66643	47998.5
chrX:96242884-96242905	MIMAT0000665	mmu-miR-223-3p	29.1141	0.514068	0.546778	0.940177	0.347127	0.850216	4.4123	14.3872	56.5852	22.4128	19.614	10.3139	69.6527	18.0486	24.4401	27.036	53.3523
chr19:6264694-6264715	MIMAT0017073	mmu-miR-194-2-3p	2.93256	-0.664414	0.718204	-0.925104	0.354912	0.855574	4.4123	5.13827	0	4.71849	4.05807	1.71898	2.82376	1.44389	2.44401	3.18071	2.31967
chr10:128085291-128085312	MIMAT0003451	mmu-miR-677-5p	45.4607	-0.252276	0.274308	-0.91968	0.35774	0.857817	73.5384	30.8296	48.044	46.0052	51.4022	55.0072	30.1201	41.8727	54.9901	35.783	32.4753
chr9:122682936-122682957	MIMAT0004668	mmu-miR-138-1-3p	189.24	-0.180869	0.196318	-0.921307	0.35689	0.857817	211.791	247.665	225.273	155.71	169.763	159.865	169.425	166.769	248.067	148.698	178.614
chr1:137966508-137966529	MIMAT0000660	mmu-miR-181a-1-3p	2653.01	0.165899	0.183022	0.906441	0.364703	0.859419	2595.91	2992.53	2046.68	2061.98	2741.23	2500.25	2867.05	2453.16	2626.08	3906.7	2391.58
chr10:126995543-126995564	MIMAT0000533	mmu-miR-26a-5p	169850	0.147714	0.165101	0.89469	0.370953	0.859419	196453	147530	158744	121026	178331	170107	165490	172811	166509	227743	163608
chr11:87113017-87113038	MIMAT0017008	mmu-miR-301a-5p	3.93385	0.727493	0.81108	0.896944	0.369749	0.859419	1.47077	1.02765	6.40587	5.89811	0	2.57846	9.41252	1.44389	2.44401	7.95177	4.63933
chr11:97063829-97063849	MIMAT0031407	mmu-miR-8103	7.46121	-0.464853	0.509642	-0.912116	0.361708	0.859419	8.82461	14.3872	11.7441	4.71849	4.05807	7.73539	2.82376	5.0536	10.998	4.77106	6.959
chr12:109715716-109715735	MIMAT0017329	mmu-miR-1193-5p	2.99691	-0.634002	0.70887	-0.894384	0.371116	0.859419	7.35384	2.05531	4.27058	2.35924	2.70538	1.71898	0.941252	2.88777	2.44401	1.59035	4.63933
chr12:109739165-109739186	MIMAT0003738	mmu-miR-496a-3p	260.929	-0.192421	0.216167	-0.890147	0.373387	0.859419	347.101	296.992	213.529	201.715	340.201	308.556	227.783	259.178	254.177	166.987	254.004
chr15:68337469-68337490	MIMAT0000130	mmu-miR-30b-5p	4278.85	0.205002	0.229912	0.891652	0.37258	0.859419	4844.71	2629.77	3436.75	4509.69	4329.96	4055.06	6245.21	4209.65	2921.81	5610.77	4273.99
chr3:140028281-140028304	MIMAT0025123	mmu-let-7j	1516.86	-0.151661	0.166482	-0.910975	0.362309	0.859419	1704.62	2017.29	1654.85	1222.09	1422.35	1486.05	1306.46	1315.38	1668.03	1638.06	1250.3
chr3:157544285-157544306	MIMAT0000215	mmu-miR-186-5p	10215.7	0.152593	0.167614	0.910386	0.362619	0.859419	11867.6	7114.45	10057.2	7706.47	11403.2	10496.9	9825.73	10658.1	11266.9	11782.9	10193.8
chr7:3656010-3656032	MIMAT0020636	mmu-miR-3572-3p	4.42883	-0.552475	0.619296	-0.892103	0.372338	0.859419	5.88307	7.19358	3.20294	9.43697	1.35269	2.57846	3.76501	2.16583	4.88801	4.77106	3.4795
chr7:24987606-24987628	MIMAT0027999	mmu-miR-7047-3p	40.8334	-0.250735	0.281815	-0.889715	0.373619	0.859419	35.2984	77.0741	30.9617	44.8256	35.8463	36.958	38.5913	38.263	35.4381	46.9154	28.9958
chr8:84178720-84178740	MIMAT0017264	mmu-miR-181d-3p	1.20117	-0.996727	1.10282	-0.903795	0.366104	0.859419	1.47077	1.02765	1.06765	2.35924	2.02903	0.859488	0	0	2.44401	0.795177	1.15983
chr8:123130147-123130168	MIMAT0028067	mmu-miR-7080-3p	58.4482	-0.411476	0.454094	-0.906147	0.364858	0.859419	26.4738	130.512	70.4646	51.9033	58.1657	37.8175	21.6488	39.7069	87.9842	96.2164	22.0368
chrX:19146344-19146369	MIMAT0017060	mmu-miR-221-5p	294.227	-0.304534	0.337192	-0.903145	0.366449	0.859419	422.11	468.611	275.452	117.962	357.11	378.175	172.249	287.333	270.063	151.084	336.352
chrX:67988135-67988156	MIMAT0000234	mmu-miR-201-5p	1.44903	0.991317	1.10546	0.896742	0.369856	0.859419	1.47077	0	0	1.17962	2.02903	2.57846	2.82376	0.721943	0	3.97588	1.15983
chrX:147002324-147002345	MIMAT0003895	mmu-miR-764-3p	66.5738	-0.415349	0.454801	-0.913255	0.361109	0.859419	35.2984	32.885	119.576	165.147	32.4646	42.9744	46.1214	59.9213	108.758	50.8913	38.2745
chr1:185313610-185313630	MIMAT0000904	mmu-miR-215-5p	14.6334	0.352546	0.403599	0.873507	0.382387	0.868047	8.82461	5.13827	25.6235	10.6166	12.8506	14.6113	10.3538	15.8828	18.33	16.6987	22.0368
chr10:78445095-78445116	MIMAT0027717	mmu-miR-6908-3p	1.04836	1.38437	1.60164	0.864346	0.387398	0.868047	0	1.02765	0	0	1.35269	0	0	0.721943	6.11002	0	2.31967
chr10:97423493-97423513	MIMAT0019350	mmu-miR-3966	3.01804	-0.572462	0.662996	-0.863448	0.387891	0.868047	4.4123	2.05531	4.27058	3.53886	4.05807	2.57846	3.76501	2.16583	2.44401	1.59035	2.31967
chr10:128388879-128388900	MIMAT0027731	mmu-miR-6915-3p	2.13857	-0.736763	0.853598	-0.863127	0.388068	0.868047	1.47077	5.13827	4.27058	0	2.70538	2.57846	1.8825	1.44389	2.44401	1.59035	0
chr12:109585850-109585871	MIMAT0000578	mmu-miR-337-3p	152.869	0.245826	0.285304	0.861627	0.388893	0.868047	101.483	57.5487	208.191	191.099	135.269	149.551	176.014	146.555	193.076	166.192	156.578
chr12:109585851-109585873	MIMAT0022353	mmu-miR-3544-5p	152.869	0.245826	0.285304	0.861627	0.388893	0.868047	101.483	57.5487	208.191	191.099	135.269	149.551	176.014	146.555	193.076	166.192	156.578
chr12:109715750-109715770	MIMAT0005851	mmu-miR-1193-3p	7.33757	-0.403151	0.466807	-0.863635	0.387789	0.868047	10.2954	5.13827	13.8794	7.07773	6.0871	5.15693	7.53002	7.21943	8.55402	3.97588	5.79917
chr16:24827868-24827889	MIMAT0000653	mmu-miR-28a-5p	167.916	-0.167258	0.190533	-0.877844	0.380028	0.868047	139.723	161.342	218.867	225.308	148.12	126.345	167.543	163.881	156.416	185.276	154.258
chr17:26948058-26948079	MIMAT0014875	mmu-miR-3083-3p	13.6172	-0.372714	0.429984	-0.866808	0.386047	0.868047	25.0031	24.6637	12.8117	4.71849	10.8215	12.8923	7.53002	13.7169	13.442	7.95177	16.2377
chr17:26948060-26948081	MIMAT0049846	mmu-miR-3083b-5p	13.6172	-0.372714	0.429984	-0.866808	0.386047	0.868047	25.0031	24.6637	12.8117	4.71849	10.8215	12.8923	7.53002	13.7169	13.442	7.95177	16.2377
chr17:34845143-34845167	MIMAT0027842	mmu-miR-6970-5p	0.768586	-1.23161	1.39919	-0.880227	0.378736	0.868047	2.94154	1.02765	1.06765	0	0.676345	0.859488	0	0.721943	0	0	1.15983
chrX:151913229-151913250	MIMAT0000545	mmu-miR-98-5p	3244.12	-0.118903	0.135941	-0.874671	0.381753	0.868047	4191.69	3511.5	2915.74	3002.14	3333.03	3486.94	2784.22	3137.57	3058.67	3023.26	3240.57
chr13:48536078-48536099	MIMAT0000383	mmu-let-7d-5p	7303.16	-0.141002	0.165855	-0.850153	0.39524	0.873587	8414.26	10247.8	5995.9	6520.95	7291.67	7391.6	7853.81	6674.37	6420.4	7209.87	6314.13
chr7:61940036-61940058	MIMAT0000593_1	mmu-miR-344-3p	186.722	-0.343861	0.403092	-0.853058	0.393627	0.873587	132.369	63.7146	260.505	454.154	145.414	156.427	189.192	105.404	158.86	256.842	131.061
chrX:66813995-66814017	MIMAT0002111	mmu-miR-470-5p	1.92188	-0.767087	0.900576	-0.851773	0.39434	0.873587	2.94154	2.05531	2.13529	2.35924	2.70538	2.57846	2.82376	0	1.222	0	2.31967
chrX:147064918-147064939	MIMAT0014809	mmu-miR-1298-5p	440.821	-0.439282	0.515447	-0.852235	0.394084	0.873587	200.024	193.199	947.001	1016.83	215.078	205.418	198.604	426.669	892.062	354.649	199.491
chr12:109717140-109717161	MIMAT0004823	mmu-miR-666-3p	772.907	-0.244765	0.289314	-0.846019	0.397542	0.874598	511.827	485.053	1235.27	1320	671.611	605.939	581.694	809.299	953.162	662.382	665.744
chr9:51103076-51103098	MIMAT0000381	mmu-miR-34c-5p	880.887	-0.143579	0.169744	-0.845857	0.397632	0.874598	957.47	724.497	780.449	1286.97	896.833	892.148	828.302	894.488	741.756	856.405	830.441
chr14:57798466-57798487	MIMAT0014863	mmu-miR-3077-3p	3.94952	-0.543572	0.648267	-0.8385	0.40175	0.879376	1.47077	8.22124	5.33823	4.71849	4.05807	4.29744	1.8825	2.88777	0	4.77106	5.79917
chr17:17830366-17830387	MIMAT0000524	mmu-let-7e-5p	20478.4	-0.14581	0.173725	-0.839317	0.401291	0.879376	24807.4	29268.6	16400.1	16954.7	20627.8	20453.2	20340.5	18954.6	18336.2	19984.4	19134.9
chr14:64590670-64590691	MIMAT0004527	mmu-miR-124-5p	50.9565	-0.224509	0.268384	-0.836522	0.402862	0.879678	51.4769	66.7976	44.8411	41.2867	71.6926	60.1642	56.4751	51.9799	50.1021	41.3492	24.3565
chr11:78073186-78073207	MIMAT0001632	mmu-miR-451a	849.855	0.329889	0.397064	0.830822	0.406074	0.884557	489.766	325.767	973.692	941.338	995.58	547.494	2188.41	620.871	1003.26	613.876	648.347
chr3:69009775-69009796	MIMAT0000124	mmu-miR-15b-5p	60.6069	0.215317	0.260699	0.825925	0.408847	0.886253	66.1845	57.5487	36.2999	56.6218	61.5474	47.2718	49.8864	54.1458	94.0942	85.0839	57.9917
chr7:30552871-30552892	MIMAT0036462	mmu-miR-9769-3p	1.24508	-0.978661	1.18733	-0.824256	0.409794	0.886253	2.94154	0	2.13529	2.35924	1.35269	0.859488	0	2.88777	0	0	1.15983
chr7:141620706-141620728	MIMAT0028030	mmu-miR-7063-5p	0.999225	-1.03339	1.25184	-0.825491	0.409093	0.886253	2.94154	1.02765	1.06765	1.17962	0.676345	0.859488	0	0	2.44401	0.795177	0
chr1:185243012-185243033	MIMAT0012774	mmu-miR-664-3p	454.519	-0.222757	0.279851	-0.795984	0.426041	0.88848	541.243	748.133	354.458	252.439	568.13	579.295	321.908	456.99	472.915	300.577	403.622
chr11:88352839-88352858	MIMAT0019348	mmu-miR-378b	15.7469	0.288565	0.363696	0.793422	0.427532	0.88848	4.4123	17.4701	10.6765	20.0536	16.2323	15.4708	16.9425	12.995	25.6621	15.9035	17.3975
chr12:109743431-109743452	MIMAT0003185	mmu-miR-369-5p	2631.39	-0.144238	0.176362	-0.817853	0.413441	0.88848	3094.5	2832.22	2910.4	1999.46	3040.17	2527.75	1930.51	3071.87	2567.43	2139.82	2831.15
chr13:48536024-48536045	MIMAT0000384	mmu-let-7d-3p	1485.7	-0.141645	0.177268	-0.799046	0.424264	0.88848	1404.58	2214.6	1480.82	1342.41	1385.15	1394.95	1311.16	1300.94	1554.39	1720.76	1232.9
chr13:83738821-83738843	MIMAT0000142	mmu-miR-9-5p	10188.9	0.136915	0.169707	0.806775	0.419796	0.88848	12708.9	7743.38	8820.88	9319.01	9731.25	11034.1	10681.3	9692.81	9580.5	13525.2	9240.39
chr13:83738821-83738841	MIMAT0049836	mmu-miR-9b-3p	10188.9	0.136915	0.169707	0.806775	0.419796	0.88848	12708.9	7743.38	8820.88	9319.01	9731.25	11034.1	10681.3	9692.81	9580.5	13525.2	9240.39
chr14:70443525-70443546	MIMAT0017057	mmu-miR-320-5p	14.9232	0.440991	0.537486	0.82047	0.411948	0.88848	19.12	15.4148	16.0147	8.25735	4.05807	27.5036	23.5313	8.66332	18.33	2.38553	20.877
chr14:115044437-115044459	MIMAT0017066	mmu-miR-92a-1-5p	6.2579	0.431711	0.529774	0.814897	0.415131	0.88848	4.4123	8.22124	6.40587	4.71849	2.70538	8.59488	2.82376	5.77555	10.998	9.54212	4.63933
chr15:78891845-78891868	MIMAT0027810	mmu-miR-6955-5p	1.77275	-0.760988	0.949929	-0.801099	0.423074	0.88848	4.4123	1.02765	1.06765	3.53886	1.35269	0	1.8825	0.721943	1.222	0.795177	3.4795
chr18:10785486-10785506	MIMAT0005835	mmu-miR-1b-5p	19.1807	0.424728	0.527602	0.805016	0.420811	0.88848	20.5907	0	20.2853	10.6166	29.0828	30.9416	24.4726	25.268	12.22	14.3132	23.1967
chr18:10785485-10785506	MIMAT0000123	mmu-miR-1a-3p	19.1807	0.424728	0.527602	0.805016	0.420811	0.88848	20.5907	0	20.2853	10.6166	29.0828	30.9416	24.4726	25.268	12.22	14.3132	23.1967
chr2:10507640-10507661	MIMAT0004886	mmu-miR-467d-5p	27.7803	-0.231675	0.286138	-0.809664	0.418134	0.88848	25.0031	31.8573	37.3676	28.3109	28.4065	24.9252	22.5901	29.5997	14.664	22.265	40.5942
chr7:79505279-79505301	MIMAT0000142_2	mmu-miR-9-5p	99465	0.133788	0.168478	0.794098	0.427138	0.88848	123281	74693	87700.6	91506.8	95113.7	106977	104612	95090.1	91932.5	131742	91466.8
chr7:79505279-79505299	MIMAT0049836_2	mmu-miR-9b-3p	99465	0.133788	0.168478	0.794098	0.427138	0.88848	123281	74693	87700.6	91506.8	95113.7	106977	104612	95090.1	91932.5	131742	91466.8
chr8:12947953-12947975	MIMAT0036459	mmu-miR-9768-5p	2.56551	-0.685346	0.860789	-0.796184	0.425925	0.88848	1.47077	4.11062	1.06765	7.07773	2.70538	0	3.76501	2.88777	0	3.97588	1.15983
chr9:21075499-21075520	MIMAT0028071	mmu-miR-7082-3p	0.786163	-1.24591	1.52803	-0.81537	0.41486	0.88848	0	2.05531	2.13529	0	1.35269	0	1.8825	0	1.222	0	0
chrX:53054269-53054289	MIMAT0000549	mmu-miR-322-3p	103.243	-0.174256	0.218102	-0.798966	0.42431	0.88848	100.012	115.097	131.32	82.5735	119.713	79.9324	109.185	109.735	103.87	63.6141	120.623
chr1:74900661-74900682	MIMAT0000739	mmu-miR-375-3p	512.886	0.41112	0.521895	0.787745	0.430846	0.890254	220.615	757.382	166.553	670.025	359.139	395.364	588.283	181.208	215.073	1653.17	434.938
chr11:97146364-97146386	MIMAT0028439	mmu-miR-7235-3p	6.52701	-0.395177	0.501991	-0.787219	0.431154	0.890254	4.4123	12.3319	5.33823	5.89811	9.46883	6.8759	8.47127	7.94138	2.44401	3.97588	4.63933
chr5:121819246-121819268	MIMAT0027966	mmu-miR-7031-5p	0.768856	1.12487	1.42949	0.786901	0.43134	0.890254	1.47077	0	1.06765	0	0	0.859488	1.8825	0	1.222	0.795177	1.15983
chr1:86352062-86352087	MIMAT0031410	mmu-miR-3535	77.5337	-0.187798	0.252217	-0.744588	0.456521	0.893	111.778	95.5719	57.6528	93.1901	58.842	72.197	63.0639	57.0335	80.6522	102.578	60.3113
chr1:133726619-133726640	MIMAT0027706	mmu-miR-6903-5p	1.04357	-0.900049	1.1814	-0.761852	0.446148	0.893	2.94154	1.02765	1.06765	0	2.02903	0	0.941252	0.721943	0	1.59035	1.15983
chr1:160295885-160295907	MIMAT0009390	mmu-miR-1927	2.96633	0.540327	0.704666	0.766784	0.44321	0.893	1.47077	3.08296	2.13529	2.35924	2.70538	1.71898	4.70626	2.16583	2.44401	6.36141	3.4795
chr1:162223397-162223418	MIMAT0004664	mmu-miR-214-5p	1.99612	0.744103	1.0233	0.72716	0.467128	0.893	0	0	4.27058	2.35924	0.676345	0.859488	5.64751	2.88777	3.66601	1.59035	0
chr1:176772382-176772400	MIMAT0017040	mmu-miR-350-5p	43.0786	-0.211066	0.277841	-0.759665	0.447455	0.893	45.5938	72.9635	32.0294	42.4664	39.9044	36.0985	28.2376	37.5411	41.5481	58.0479	39.4343
chr10:126995581-126995602	MIMAT0017058	mmu-miR-26a-2-3p	8.43587	0.329449	0.459301	0.717283	0.473199	0.893	8.82461	7.19358	4.27058	5.89811	10.8215	11.1733	14.1188	7.94138	3.66601	11.9277	6.959
chr11:50069762-50069783	MIMAT0000586	mmu-miR-340-3p	254.986	0.162934	0.209758	0.776772	0.437293	0.893	269.15	177.784	280.791	149.812	318.558	291.366	268.257	286.612	249.289	259.228	254.004
chr11:78073010-78073032	MIMAT0016988	mmu-miR-144-5p	140.16	0.317197	0.417681	0.759423	0.4476	0.893	80.8922	36.9956	176.161	145.093	177.879	89.3867	319.084	106.848	191.854	122.457	95.1063
chr12:11299924-11299944	MIMAT0029859	mmu-miR-7675-3p	0.741316	1.11361	1.50729	0.738819	0.460017	0.893	0	0	1.06765	1.17962	0	0.859488	0	1.44389	2.44401	0	1.15983
chr12:87437685-87437706	MIMAT0014843	mmu-miR-3068-3p	291.062	0.153947	0.196813	0.7822	0.434097	0.893	327.981	154.148	295.738	284.289	309.766	292.226	335.086	321.987	285.949	304.553	289.958
chr12:109591729-109591750	MIMAT0001419	mmu-miR-433-5p	105.912	-0.136954	0.185653	-0.737687	0.460705	0.893	88.2461	115.097	90.7498	142.734	119.037	99.7006	113.892	100.35	94.0942	87.4694	113.664
chr12:109595329-109595350	MIMAT0014851	mmu-miR-3071-3p	5106.34	0.255982	0.351244	0.728784	0.466134	0.893	3888.71	1142.75	6568.15	7647.48	3840.29	4873.3	6595.35	5793.6	4690.05	5836.6	5293.48
chr12:109595331-109595352	MIMAT0000148	mmu-miR-136-5p	5101.74	0.255888	0.351595	0.72779	0.466742	0.893	3885.77	1138.64	6563.88	7641.59	3837.58	4867.28	6592.53	5789.26	4681.49	5833.42	5287.68
chr12:109611841-109611861	MIMAT0005843	mmu-miR-1188-5p	3.11566	-0.657092	0.857727	-0.766085	0.443626	0.893	8.82461	3.08296	1.06765	7.07773	0	3.43795	2.82376	2.88777	0	1.59035	3.4795
chr12:109711842-109711863	MIMAT0000745	mmu-miR-380-3p	1021.12	-0.189331	0.24455	-0.774201	0.438812	0.893	1067.78	544.657	1206.44	1653.83	1000.31	988.411	943.135	1021.55	1011.82	730.767	1063.57
chr12:109726829-109726851	MIMAT0017081	mmu-miR-381-5p	8.43854	-0.325779	0.452013	-0.72073	0.471076	0.893	7.35384	5.13827	9.60881	10.6166	14.2032	9.45437	10.3538	7.21943	3.66601	4.77106	10.4385
chr12:109729371-109729392	MIMAT0004941	mmu-miR-544-3p	15.1574	0.323956	0.424149	0.76378	0.444998	0.893	13.2369	5.13827	16.0147	27.1313	6.0871	14.6113	16.0013	22.3802	18.33	12.7228	15.0778
chr13:58392800-58392821	MIMAT0004670	mmu-miR-7a-1-3p	109.494	0.150305	0.197647	0.760475	0.446971	0.893	100.012	84.2677	95.0204	115.603	121.742	118.609	115.774	100.35	91.6502	155.855	105.545
chr14:63727236-63727257	MIMAT0004942	mmu-miR-598-3p	1192.45	-0.259963	0.335173	-0.775608	0.437981	0.893	1161.91	547.74	1604.67	2102.09	1134.91	1420.73	1233.04	1004.95	1339.32	456.431	1111.12
chr15:27571539-27571558	MIMAT0028132	mmu-miR-7117-3p	1.25254	0.932643	1.21339	0.768625	0.442116	0.893	1.47077	2.05531	0	0	0.676345	4.29744	0.941252	0	1.222	0.795177	2.31967
chr15:103285148-103285171	MIMAT0017036	mmu-miR-148b-5p	104.661	0.133645	0.18396	0.72649	0.467539	0.893	102.954	69.8805	120.644	102.627	101.452	114.312	92.2427	114.067	114.868	118.481	99.7457
chr16:18284288-18284310	MIMAT0019136	mmu-miR-1306-5p	13.6411	0.31401	0.41656	0.753817	0.450959	0.893	8.82461	20.5531	3.20294	15.3351	12.1742	16.3303	15.06	10.1072	13.442	22.265	12.7582
chr16:77646279-77646300	MIMAT0000136	mmu-miR-125b-5p	19144	-0.210426	0.293347	-0.717329	0.473171	0.893	21742.4	35091.3	15421.1	9659.92	21457	19048	11807.1	19229	18952	14698.8	23477.3
chr17:17830411-17830432	MIMAT0017016	mmu-let-7e-3p	115.313	-0.150911	0.202574	-0.744968	0.456291	0.893	123.544	172.646	101.426	92.0105	120.389	108.295	126.128	110.457	92.8722	123.252	97.426
chr17:17830855-17830876	MIMAT0004528	mmu-miR-125a-3p	50.8224	-0.168417	0.236894	-0.710938	0.477123	0.893	47.0646	83.24	43.7735	51.9033	43.9624	46.4123	42.3563	47.6483	51.3241	44.5299	56.8318
chr17:25831366-25831387	MIMAT0014873	mmu-miR-3082-3p	85.8741	-0.141019	0.191908	-0.734824	0.462447	0.893	101.483	93.5166	87.5469	73.1365	96.041	69.6185	61.1814	89.521	91.6502	83.4936	97.426
chr17:34025050-34025071	MIMAT0029893	mmu-miR-219c-3p	1.96192	-0.661819	0.889201	-0.744286	0.456704	0.893	1.47077	0	2.13529	5.89811	2.70538	1.71898	0.941252	0.721943	2.44401	2.38553	1.15983
chr17:56243055-56243076	MIMAT0017071	mmu-miR-7b-3p	6.49545	-0.359816	0.485101	-0.741735	0.458248	0.893	4.4123	11.3042	10.6765	5.89811	4.73441	5.15693	7.53002	5.0536	4.88801	7.15659	4.63933
chr17:67026197-67026218	MIMAT0022504	mmu-miR-5709-5p	2.17134	0.607489	0.849663	0.714976	0.474624	0.893	0	2.05531	3.20294	2.35924	0.676345	1.71898	2.82376	0.721943	3.66601	3.18071	3.4795
chr2:45023110-45023131	MIMAT0022987	mmu-miR-5129-3p	20.0757	-0.2404	0.337657	-0.711965	0.476487	0.893	19.12	33.9126	14.947	14.1555	27.0538	17.1898	16.0013	16.6047	14.664	28.6264	18.5573
chr3:55887284-55887305	MIMAT0049858	mmu-miR-12194-3p	9.43932	-0.308795	0.400777	-0.770492	0.441008	0.893	10.2954	11.3042	13.8794	7.07773	10.1452	10.3139	6.58877	10.8292	8.55402	5.56624	9.27867
chr3:88215613-88215635	MIMAT0000142_1	mmu-miR-9-5p	6491.99	0.121695	0.170101	0.715427	0.474345	0.893	8053.92	4889.58	5732.19	6129.31	6170.97	6870.75	6633.95	6275.85	6055.03	8724.68	5875.72
chr3:88215613-88215633	MIMAT0049836_1	mmu-miR-9b-3p	6491.45	0.12148	0.170133	0.714027	0.475211	0.893	8053.92	4889.58	5732.19	6129.31	6170.97	6869.03	6633.95	6275.13	6052.58	8724.68	5874.56
chr4:36668520-36668540	MIMAT0017279	mmu-miR-873a-3p	268.017	-0.229362	0.304773	-0.752567	0.45171	0.893	336.806	390.509	168.688	171.045	388.898	297.383	240.961	277.226	273.729	115.301	287.639
chr5:137529509-137529530	MIMAT0025174	mmu-miR-6418-3p	11.3962	0.274205	0.374292	0.732596	0.463805	0.893	5.88307	13.3595	12.8117	7.07773	11.4979	12.8923	9.41252	15.8828	12.22	12.7228	11.5983
chr7:45121762-45121783	MIMAT0000160	mmu-miR-150-5p	2351.71	-0.169424	0.234789	-0.7216	0.47054	0.893	2187.03	3972.91	2010.38	1522.89	2821.03	2214.9	2199.71	2696.46	1812.23	2110.4	2320.83
chr7:45121798-45121819	MIMAT0004535	mmu-miR-150-3p	7.932	-0.423822	0.557408	-0.760345	0.447049	0.893	7.35384	21.5808	9.60881	3.53886	4.05807	8.59488	2.82376	4.33166	6.11002	11.1325	8.11883
chr7:61683127-61683148	MIMAT0014808	mmu-miR-344d-3p	15.9273	-0.260015	0.364207	-0.713921	0.475276	0.893	19.12	22.6084	19.2176	16.5147	10.1452	17.1898	7.53002	15.1608	20.7741	9.54212	17.3975
chr7:61790522-61790543	MIMAT0014926	mmu-miR-344b-3p	344.328	-0.287901	0.387116	-0.743708	0.457053	0.893	244.147	105.848	565.852	706.593	287.447	284.491	293.671	341.479	444.809	190.842	322.434
chr8:38252138-38252158	MIMAT0017082	mmu-miR-383-3p	7.40154	0.332905	0.463475	0.71828	0.472585	0.893	5.88307	3.08296	5.33823	8.25735	9.46883	11.1733	6.58877	9.38526	8.55402	5.56624	8.11883
chr9:51103044-51103065	MIMAT0004580	mmu-miR-34c-3p	6.09426	-0.438267	0.56206	-0.779752	0.435537	0.893	4.4123	9.24889	2.13529	11.7962	7.43979	1.71898	5.64751	2.88777	6.11002	6.36141	9.27867
chr9:106178902-106178923	MIMAT0004519	mmu-let-7g-3p	93.1215	-0.176897	0.241057	-0.73384	0.463047	0.893	138.252	80.1571	119.576	73.1365	86.5722	110.014	90.3602	72.9163	72.0982	67.59	113.664
chr9:108568325-108568347	MIMAT0000221	mmu-miR-191-5p	53596.4	-0.192882	0.256912	-0.750771	0.45279	0.893	60014.7	92299.8	46334.7	29492.9	59471.7	53714.6	35922.9	49638.7	58439.9	52283.7	51946.6
chrX:7242019-7242042	MIMAT0000706	mmu-miR-362-5p	10.5877	0.313989	0.415321	0.756015	0.44964	0.893	10.2954	5.13827	9.60881	8.25735	12.8506	11.1733	10.3538	6.49749	17.108	15.9035	9.27867
chrX:147158221-147158242	MIMAT0017176	mmu-miR-448-5p	10.9012	-0.331586	0.45339	-0.731348	0.464566	0.893	7.35384	6.16593	14.947	22.4128	10.1452	4.29744	6.58877	9.38526	15.886	11.1325	11.5983
chr19:24942276-24942297	MIMAT0014876	mmu-miR-3084-5p	2.49686	-0.682567	0.962538	-0.709133	0.478242	0.893245	2.94154	3.08296	1.06765	1.17962	7.43979	3.43795	4.70626	3.60972	0	0	0
chr11:106782695-106782716	MIMAT0014835	mmu-miR-3064-3p	1.51461	-0.666679	0.944681	-0.705718	0.480363	0.895358	1.47077	3.08296	2.13529	2.35924	0.676345	0.859488	1.8825	1.44389	0	1.59035	1.15983
chr11:96317186-96317208	MIMAT0000648	mmu-miR-10a-5p	693.905	0.228095	0.329357	0.692547	0.488594	0.900303	425.052	943.387	734.54	310.24	758.183	578.435	908.308	562.394	481.469	609.901	1321.05
chr2:84741116-84741137	MIMAT0000141	mmu-miR-130a-3p	1279.88	0.133525	0.192812	0.692514	0.488615	0.900303	1089.84	1360.61	1060.17	1475.71	1092.3	1072.64	1518.24	1129.12	1080.25	1854.35	1345.41
chr4:120772621-120772642	MIMAT0025179	mmu-miR-30f	2177.56	0.0981398	0.141838	0.691913	0.488992	0.900303	2164.97	2329.69	2008.24	1716.35	2265.76	2220.92	1930.51	2209.15	2243.6	2760.06	2103.94
chr4:120772618-120772639	MIMAT0000249	mmu-miR-30e-3p	2175.32	0.0990058	0.141777	0.698319	0.484977	0.900303	2160.56	2327.64	2006.11	1713.99	2262.37	2220.06	1927.68	2207.7	2242.38	2756.08	2103.94
chr6:36421763-36421782	MIMAT0017261	mmu-miR-490-5p	12.5155	0.283237	0.409232	0.692119	0.488863	0.900303	11.7661	10.2765	10.6765	10.6166	12.8506	10.3139	5.64751	15.1608	10.998	25.4457	13.918
chr7:61726296-61726318	MIMAT0014807	mmu-miR-344d-3-5p	37.0668	-0.196819	0.283411	-0.694465	0.487391	0.900303	45.5938	40.0785	39.5029	34.209	39.9044	36.0985	15.06	46.2044	46.4361	31.0119	33.6352
chr13:48537833-48537854	MIMAT0004623	mmu-let-7f-1-3p	37.6648	0.176563	0.256374	0.688692	0.491017	0.902194	27.9446	26.719	42.7058	34.209	42.6097	33.52	41.4151	33.9313	57.4341	41.3492	32.4753
chr14:34894624-34894646	MIMAT0000597	mmu-miR-346-5p	119.607	-0.156805	0.228591	-0.685962	0.492737	0.903518	110.308	180.867	92.8851	121.501	127.153	125.485	72.4764	125.618	131.976	100.987	126.422
chr14:54643084-54643105	MIMAT0027796	mmu-miR-6948-5p	0.763914	1.1106	1.62966	0.681489	0.495562	0.904876	1.47077	0	1.06765	0	0	0	0.941252	1.44389	0	0	3.4795
chr2:74726074-74726096	MIMAT0000208	mmu-miR-10b-5p	1085.26	0.235633	0.3465	0.680038	0.496481	0.904876	645.667	1524.01	1014.26	447.076	1314.81	972.94	1418.47	891.6	673.324	955.007	2080.74
chr9:41581940-41581961	MIMAT0000136_1	mmu-miR-125b-5p	10674.7	-0.198497	0.290723	-0.682771	0.494752	0.904876	12173.5	19354.9	8565.72	5428.62	11874.6	10796.9	6616.06	10766.3	10427.4	8322.32	13095.7
chr12:36816250-36816269	MIMAT0020606	mmu-miR-5099	195.664	-0.123499	0.183754	-0.672088	0.501528	0.906762	227.969	215.808	180.432	188.739	211.02	192.525	133.658	155.218	200.409	237.758	208.77
chr12:109723471-109723492	MIMAT0003388	mmu-miR-376b-5p	914.41	0.169491	0.252085	0.672357	0.501357	0.906762	847.162	410.034	872.266	1233.88	917.8	905.9	1137.03	1074.25	834.628	713.274	1112.28
chr7:62046225-62046246	MIMAT0014931	mmu-miR-344f-5p	2.31147	0.57489	0.850649	0.675825	0.499152	0.906762	1.47077	0	2.13529	3.53886	2.02903	0.859488	2.82376	1.44389	2.44401	6.36141	2.31967
chr8:84005704-84005724	MIMAT0031417	mmu-miR-8111	25.1638	-0.191837	0.284312	-0.674739	0.499842	0.906762	27.9446	33.9126	20.2853	21.2332	31.1119	28.3631	15.06	21.6583	21.9961	26.2408	28.9958
chr17:17830817-17830840	MIMAT0000135	mmu-miR-125a-5p	51254.4	-0.18054	0.270333	-0.667842	0.504234	0.909836	58170.3	90627.8	43613.3	26521.4	54908.4	48748.4	34181.6	46619.5	48768.9	56198.3	55440
chr4:133369784-133369803	MIMAT0020630	mmu-miR-5122	2.3333	0.600152	0.905786	0.662576	0.507602	0.914088	4.4123	3.08296	2.13529	0	0	1.71898	3.76501	1.44389	1.222	5.56624	2.31967
chr17:25780859-25780879	MIMAT0027835	mmu-miR-6966-3p	1.14883	-0.799134	1.21022	-0.66032	0.509049	0.91417	0	1.02765	2.13529	0	4.05807	0	0	1.44389	1.222	1.59035	1.15983
chr8:70798135-70798155	MIMAT0028448	mmu-miR-7240-5p	5.43983	-0.371102	0.56347	-0.658601	0.510152	0.91417	4.4123	8.22124	6.40587	3.53886	8.11614	1.71898	2.82376	5.77555	8.55402	7.95177	2.31967
chrX:52742159-52742181	MIMAT0003187	mmu-miR-20b-5p	1.21989	-0.710883	1.08074	-0.657778	0.510681	0.91417	0	1.02765	2.13529	1.17962	3.38172	1.71898	0.941252	1.44389	0	1.59035	0
chr10:80278212-80278232	MIMAT0027723	mmu-miR-6911-3p	9.73076	0.322293	0.495325	0.650669	0.51526	0.916142	16.1784	6.16593	4.27058	8.25735	8.11614	3.43795	12.2363	5.0536	15.886	13.518	13.918
chr12:109710676-109710697	MIMAT0004577	mmu-miR-299a-3p	81.3018	-0.177836	0.273554	-0.650095	0.515631	0.916142	73.5384	43.1615	104.629	127.399	84.5431	70.478	76.2414	75.0821	98.9823	53.2768	86.9875
chr12:109710673-109710693	MIMAT0022836	mmu-miR-299b-5p	81.3018	-0.177836	0.273554	-0.650095	0.515631	0.916142	73.5384	43.1615	104.629	127.399	84.5431	70.478	76.2414	75.0821	98.9823	53.2768	86.9875
chr15:80940049-80940071	MIMAT0020621	mmu-miR-5113	0.915669	-1.0062	1.54854	-0.649776	0.515837	0.916142	0	4.11062	2.13529	0	0	0	1.8825	0.721943	1.222	0	0
chr17:26948093-26948114	MIMAT0014874	mmu-miR-3083-5p	49.555	-0.146902	0.228806	-0.64204	0.520847	0.921421	66.1845	53.438	39.5029	48.3645	55.4603	57.5857	35.7676	55.5896	37.8821	50.0961	45.2335
chr17:26948094-26948115	MIMAT0049847	mmu-miR-3083b-3p	49.555	-0.146902	0.228806	-0.64204	0.520847	0.921421	66.1845	53.438	39.5029	48.3645	55.4603	57.5857	35.7676	55.5896	37.8821	50.0961	45.2335
chr2:168640731-168640754	MIMAT0027912	mmu-miR-7004-5p	0.896229	0.880482	1.37724	0.639309	0.522622	0.922754	0	0	1.06765	1.17962	0.676345	1.71898	0.941252	0	0	0.795177	3.4795
chr1:34433130-34433149	MIMAT0020610	mmu-miR-5103	1.20694	-0.719807	1.14488	-0.62872	0.529533	0.922871	4.4123	1.02765	1.06765	0	1.35269	0	0	1.44389	1.222	1.59035	1.15983
chr11:65734742-65734763	MIMAT0004820	mmu-miR-744-3p	67.8783	-0.138753	0.220101	-0.630406	0.528429	0.922871	94.1291	63.7146	60.8558	53.083	85.8958	63.6021	54.5926	83.0235	64.7662	58.0479	64.9507
chr12:109728136-109728157	MIMAT0003169	mmu-miR-539-5p	23.4993	-0.185011	0.293945	-0.629407	0.529083	0.922871	19.12	23.6361	21.3529	40.1071	21.643	23.2062	21.6488	17.3266	18.33	25.4457	26.6762
chr16:17124420-17124442	MIMAT0004186	mmu-miR-301b-3p	73.2811	0.153749	0.242753	0.633353	0.526503	0.922871	77.9507	38.0232	62.9911	96.7289	70.3399	71.3375	73.4177	67.8627	84.3182	97.0116	66.1105
chr2:117185151-117185172	MIMAT0003740	mmu-miR-674-5p	147.439	0.122365	0.192247	0.636499	0.524451	0.922871	120.603	150.038	119.576	125.04	185.995	165.881	190.133	149.442	120.978	137.566	156.578
chr3:31039007-31039028	MIMAT0027921	mmu-miR-7008-3p	4.26175	-0.394712	0.628262	-0.628259	0.529834	0.922871	2.94154	7.19358	5.33823	1.17962	7.43979	6.01642	0.941252	3.60972	2.44401	3.97588	5.79917
chr8:84011594-84011613	MIMAT0005860	mmu-miR-1199-5p	3.09738	0.517172	0.81452	0.634941	0.525467	0.922871	0	1.02765	3.20294	7.07773	1.35269	2.57846	2.82376	4.33166	6.11002	5.56624	0
chr5:123996908-123996929	MIMAT0027969	mmu-miR-7032-3p	1.63875	-0.603499	0.963137	-0.626597	0.530924	0.92299	4.4123	1.02765	2.13529	1.17962	1.35269	2.57846	0.941252	0	2.44401	0.795177	1.15983
chr12:110278094-110278115	MIMAT0014800	mmu-miR-1247-5p	54	0.211401	0.339069	0.623473	0.532974	0.923004	23.5323	67.8252	59.7881	70.7773	26.3775	48.1313	41.4151	39.7069	78.2082	77.9273	60.3113
chr5:114404518-114404539	MIMAT0027959	mmu-miR-7027-3p	1.30211	0.718752	1.15215	0.623836	0.532736	0.923004	0	1.02765	2.13529	0	1.35269	0.859488	3.76501	0.721943	3.66601	0.795177	0
chr12:108658680-108658702	MIMAT0000590	mmu-miR-342-3p	2047.38	-0.138067	0.222208	-0.621343	0.534374	0.92366	1694.32	3415.92	1630.29	1969.97	2062.18	2321.48	1777.08	1578.89	1856.22	2435.63	1779.18
chr2:168640696-168640716	MIMAT0027913	mmu-miR-7004-3p	2.33433	-0.496198	0.801219	-0.619304	0.535716	0.924213	4.4123	2.05531	1.06765	4.71849	2.02903	2.57846	3.76501	1.44389	1.222	2.38553	0
chr1:23272315-23272336	MIMAT0000129	mmu-miR-30a-3p	4583.2	0.0892414	0.14518	0.614694	0.538757	0.924724	4502.02	5012.9	4236.42	3511.73	4881.18	4479.65	4076.56	4573.51	4848.91	5723.68	4568.58
chr11:35616840-35616860	MIMAT0000663	mmu-miR-218-5p	2807.84	0.152387	0.249765	0.610123	0.54178	0.924724	3082.73	1216.74	3276.6	2763.85	2895.43	3327.94	3036.48	3470.38	2943.81	1980.79	2891.46
chr11:107637759-107637779	MIMAT0027765	mmu-miR-6932-3p	2.5396	-0.521842	0.865116	-0.603205	0.546372	0.924724	2.94154	2.05531	6.40587	1.17962	2.70538	1.71898	7.53002	1.44389	0	0.795177	1.15983
chr12:109722733-109722754	MIMAT0005295	mmu-miR-376c-5p	114.998	0.166814	0.273255	0.61047	0.541551	0.924724	111.778	49.3274	116.373	149.812	112.273	124.626	155.307	139.335	87.9842	88.2646	129.901
chr14:20690684-20690703	MIMAT0027793	mmu-miR-6946-3p	3.25461	-0.430456	0.711577	-0.604933	0.545224	0.924724	8.82461	3.08296	3.20294	2.35924	2.02903	4.29744	3.76501	0.721943	1.222	3.97588	2.31967
chr14:115044476-115044496	MIMAT0000539	mmu-miR-92a-3p	2732.83	0.168507	0.27819	0.605725	0.544697	0.924724	1954.65	4473.38	1997.56	2105.62	2267.11	2086.84	2465.14	2265.46	3921.41	4099.93	2424.05
chr15:76064828-76064849	MIMAT0027805	mmu-miR-6952-3p	3.96995	-0.388878	0.632232	-0.615088	0.538497	0.924724	1.47077	6.16593	4.27058	8.25735	2.70538	0.859488	3.76501	5.0536	3.66601	3.97588	3.4795
chr17:34025052-34025072	MIMAT0000664	mmu-miR-219a-5p	2.03421	-0.532976	0.883062	-0.603554	0.54614	0.924724	1.47077	0	2.13529	5.89811	2.70538	1.71898	0.941252	0.721943	2.44401	3.18071	1.15983
chr17:34841809-34841829	MIMAT0027845	mmu-miR-6971-3p	11.2174	-0.247637	0.412503	-0.600328	0.548288	0.924724	13.2369	15.4148	7.47352	15.3351	10.1452	14.6113	9.41252	4.33166	10.998	14.3132	8.11883
chr7:61877782-61877804	MIMAT0000593	mmu-miR-344-3p	378.491	-0.234218	0.385104	-0.608194	0.543059	0.924724	255.914	140.789	483.643	897.692	283.389	312.854	385.913	257.734	331.163	535.949	278.36
chr9:67236664-67236685	MIMAT0016998	mmu-miR-190a-3p	4.1341	0.458052	0.754517	0.607079	0.543798	0.924724	1.47077	0	8.54116	5.89811	1.35269	6.01642	9.41252	2.88777	3.66601	1.59035	4.63933
chrX:53048044-53048065	MIMAT0003511	mmu-miR-450b-5p	22.9466	0.202589	0.33685	0.601422	0.547559	0.924724	26.4738	7.19358	25.6235	21.2332	25.7011	18.0492	26.3551	31.7655	19.5521	21.4698	28.9958
chr1:193507503-193507524	MIMAT0000238	mmu-miR-205-5p	19.5137	0.264432	0.452245	0.584709	0.558743	0.925112	16.1784	22.6084	20.2853	8.25735	20.2903	24.0657	42.3563	11.5511	4.88801	17.4939	26.6762
chr12:80391615-80391636	MIMAT0014806	mmu-miR-1843a-3p	64.3435	-0.156141	0.263997	-0.591451	0.554218	0.925112	94.1291	82.2124	58.7205	36.5683	68.9872	72.197	68.7114	49.8141	63.5442	42.1444	70.7498
chr12:109711806-109711827	MIMAT0000744	mmu-miR-380-5p	32.6499	-0.190367	0.319274	-0.596252	0.551007	0.925112	39.7107	18.4978	35.2323	50.7237	31.1119	37.8175	28.2376	33.2094	36.6601	14.3132	33.6352
chr13:58023135-58023156	MIMAT0004853	mmu-miR-874-3p	541.174	0.113906	0.194812	0.584697	0.558751	0.925112	648.609	405.924	598.949	399.892	537.694	594.766	403.797	680.793	601.226	570.937	510.327
chr15:85707325-85707346	MIMAT0000522	mmu-let-7b-5p	37271.7	-0.137172	0.234296	-0.585463	0.558236	0.925112	45539.4	63109.3	25421.7	29416.2	32572.1	36938.2	38328.7	32137.3	31003.4	41237.1	34284.7
chr4:88910614-88910635	MIMAT0000538	mmu-miR-31-5p	517.099	-0.153498	0.258387	-0.594062	0.552471	0.925112	648.609	599.123	419.585	422.304	645.909	551.791	554.398	542.901	436.255	225.83	641.388
chr8:123130106-123130128	MIMAT0028066	mmu-miR-7080-5p	2.42195	-0.506526	0.857877	-0.590441	0.554895	0.925112	1.47077	2.05531	2.13529	8.25735	0.676345	0.859488	0.941252	1.44389	3.66601	3.97588	1.15983
chr9:106154140-106154162	MIMAT0000147_1	mmu-miR-135a-5p	46.6696	0.194055	0.330001	0.588046	0.556502	0.925112	44.123	16.4425	44.8411	66.0588	45.3151	77.3539	58.3576	43.3166	42.7701	34.1926	40.5942
chrX:53053315-53053338	MIMAT0000609	mmu-miR-351-5p	1205.92	-0.129473	0.220109	-0.58822	0.556385	0.925112	1003.06	1508.6	1548.09	769.113	1494.72	1196.41	970.431	1305.27	1362.53	878.67	1228.26
chrX:53054027-53054049	MIMAT0003188	mmu-miR-503-5p	1.04945	0.714826	1.20967	0.590928	0.554569	0.925112	0	0	1.06765	1.17962	1.35269	0	0.941252	1.44389	2.44401	0.795177	2.31967
chr12:109710225-109710246	MIMAT0001093	mmu-miR-411-3p	747.513	-0.131515	0.227725	-0.577516	0.563591	0.925463	814.805	569.321	671.549	1079.35	789.295	776.977	910.191	765.26	667.214	416.673	762.011
chr15:79002265-79002284	MIMAT0027813	mmu-miR-6956-3p	1.16643	-0.682816	1.18382	-0.576789	0.564082	0.925463	0	2.05531	0	2.35924	2.70538	0.859488	0.941252	0	0	1.59035	2.31967
chr2:10507676-10507697	MIMAT0004887	mmu-miR-467d-3p	1.69549	0.613046	1.05609	0.580485	0.561588	0.925463	1.47077	2.05531	1.06765	2.35924	0	1.71898	0	2.88777	0	4.77106	2.31967
chr4:36645422-36645443	MIMAT0004854	mmu-miR-876-5p	5.85413	0.481917	0.830718	0.580121	0.561833	0.925463	2.94154	0	1.06765	15.3351	4.73441	4.29744	20.7075	1.44389	4.88801	3.18071	5.79917
chrX:105344332-105344354	MIMAT0004745	mmu-miR-384-5p	1519.99	0.110672	0.191824	0.576947	0.563975	0.925463	1601.67	1020.46	1430.64	1969.97	1262.74	1462.85	1700.84	1448.94	1350.31	1977.6	1493.87
chr2:29845689-29845709	MIMAT0000664_1	mmu-miR-219a-5p	126.836	0.277627	0.485462	0.571883	0.567401	0.929222	113.249	18.4978	146.267	225.308	65.6055	88.5273	81.8889	212.251	246.845	124.843	71.9097
chr3:89227126-89227147	MIMAT0004899	mmu-miR-92b-3p	24757.8	-0.176144	0.310024	-0.568163	0.569924	0.931666	14678.3	50985	24603.9	16853.2	24947	19530.1	17191	19433.3	32886.5	28801.3	22426.5
chr11:96850400-96850423	MIMAT0016991	mmu-miR-152-5p	47.2851	0.148376	0.262925	0.564326	0.572532	0.932557	47.0646	22.6084	67.2616	41.2867	45.3151	45.5529	60.2401	48.3702	43.9921	50.8913	47.5532
chr16:11254381-11254402	MIMAT0009410	mmu-miR-1945	0.716342	-0.831156	1.47227	-0.564541	0.572386	0.932557	1.47077	1.02765	1.06765	0	1.35269	0	0	2.16583	0	0.795177	0
chr1:93274554-93274573	MIMAT0027702	mmu-miR-6901-5p	1.29677	-0.641951	1.15389	-0.556338	0.57798	0.933025	2.94154	0	3.20294	1.17962	0.676345	1.71898	0.941252	0	2.44401	0	1.15983
chr15:85706616-85706637	MIMAT0000523	mmu-let-7c-5p	8029.16	-0.118596	0.213017	-0.556742	0.577704	0.933025	9708.54	12647.3	5849.63	6460.79	7286.26	8069.73	8229.37	6890.95	6832.22	8960.05	7385.82
chr19:42280095-42280115	MIMAT0014879	mmu-miR-3085-3p	105.236	-0.257107	0.460639	-0.558153	0.57674	0.933025	33.8277	93.5166	145.2	238.284	66.9581	38.677	119.539	94.5746	124.644	160.626	41.754
chr2:29845689-29845711	MIMAT0029807	mmu-miR-219b-3p	127.031	0.272198	0.485034	0.561194	0.574665	0.933025	114.72	18.4978	146.267	225.308	66.2818	88.5273	81.8889	212.251	246.845	124.843	71.9097
chr2:117185186-117185207	MIMAT0003741	mmu-miR-674-3p	473.472	-0.125491	0.2246	-0.558732	0.576344	0.933025	510.356	656.671	420.652	296.085	594.507	463.264	487.569	399.235	431.367	354.649	593.835
chr10:128085335-128085360	MIMAT0017246	mmu-miR-677-3p	1.85197	-0.540763	0.97953	-0.552063	0.580905	0.936075	4.4123	4.11062	1.06765	1.17962	0.676345	2.57846	0	0.721943	2.44401	3.18071	0
chr1:185313325-185313346	MIMAT0000224	mmu-miR-194-5p	22.2587	0.123144	0.285614	0.431155	0.666356	0.937027	22.0615	14.3872	21.3529	25.9517	22.9957	24.9252	22.5901	22.3802	17.108	30.2167	20.877
chr10:60126813-60126833	MIMAT0027713	mmu-miR-6906-3p	1.97655	0.448477	0.989315	0.453321	0.650318	0.937027	0	2.05531	1.06765	1.17962	3.38172	4.29744	0	0.721943	2.44401	0.795177	5.79917
chr10:77641236-77641257	MIMAT0009393	mmu-miR-1930-5p	1.1774	-0.593108	1.3625	-0.435309	0.663338	0.937027	0	5.13827	1.06765	1.17962	0	0	0.941252	1.44389	0	3.18071	0
chr10:81416276-81416297	MIMAT0029866	mmu-miR-1191b-5p	9.23677	-0.179104	0.414852	-0.43173	0.665937	0.937027	8.82461	9.24889	8.54116	10.6166	11.4979	6.01642	11.295	7.21943	6.11002	7.15659	15.0778
chr10:92072104-92072124	MIMAT0017064	mmu-miR-135a-2-3p	44.5792	-0.118263	0.265782	-0.444963	0.656347	0.937027	55.8892	46.2445	28.8264	50.7237	50.7259	47.2718	53.6514	33.2094	40.3261	27.8312	55.672
chr10:93433107-93433129	MIMAT0029906	mmu-miR-7688-5p	23.2886	-0.156445	0.357537	-0.437563	0.661703	0.937027	32.3569	28.7743	24.5558	15.3351	22.3194	24.0657	18.825	12.995	37.8821	28.6264	10.4385
chr10:93963783-93963803	MIMAT0000571	mmu-miR-331-3p	352.782	0.117494	0.257625	0.456067	0.648341	0.937027	247.089	322.684	259.438	533.189	323.969	324.027	508.276	357.362	218.739	428.6	357.229
chr11:21344600-21344621	MIMAT0009397	mmu-miR-1933-3p	4.15992	-0.330846	0.633019	-0.522648	0.601219	0.937027	4.4123	4.11062	7.47352	1.17962	6.0871	2.57846	0.941252	5.77555	6.11002	4.77106	2.31967
chr11:98262638-98262656	MIMAT0020627	mmu-miR-5119	2.83338	0.631441	1.38729	0.455161	0.648994	0.937027	0	9.24889	0	0	1.35269	2.57846	0.941252	0	15.886	0	1.15983
chr12:109595363-109595384	MIMAT0014850	mmu-miR-3071-5p	16703.4	0.124405	0.284669	0.437015	0.6621	0.937027	18003.7	5258.51	19225.1	21181.3	15938.7	17021.3	18441	19808.7	16327.2	15018.5	17513.5
chr12:109595366-109595387	MIMAT0004532	mmu-miR-136-3p	16703.4	0.124405	0.284669	0.437015	0.6621	0.937027	18003.7	5258.51	19225.1	21181.3	15938.7	17021.3	18441	19808.7	16327.2	15018.5	17513.5
chr12:109710190-109710210	MIMAT0004747	mmu-miR-411-5p	34847	-0.0954393	0.215428	-0.443021	0.65775	0.937027	39266.6	21206.7	39861.6	36837.2	43365.9	35453	28974.6	39934.3	38808.4	23498.3	36110.3
chr12:109718795-109718816	MIMAT0003456	mmu-miR-495-3p	220.96	-0.129402	0.238029	-0.543639	0.58669	0.937027	222.086	165.452	160.147	356.246	255.658	264.722	228.724	196.369	153.972	209.132	218.049
chr12:109723508-109723528	MIMAT0001092	mmu-miR-376b-3p	844.502	0.117177	0.261147	0.448702	0.653647	0.937027	933.938	362.762	844.507	1107.66	788.618	814.795	1020.32	1084.36	640.33	743.49	948.744
chr12:109724318-109724339	MIMAT0004578	mmu-miR-300-5p	28.9416	-0.178739	0.35539	-0.502938	0.615008	0.937027	30.8861	12.3319	24.5558	48.3645	38.5517	41.2554	22.5901	32.4875	29.3281	18.2891	19.7172
chr12:109728176-109728197	MIMAT0017208	mmu-miR-539-3p	6.11636	0.289689	0.602332	0.480945	0.630555	0.937027	2.94154	3.08296	4.27058	15.3351	2.02903	6.01642	11.295	7.21943	6.11002	3.18071	5.79917
chr12:109729335-109729355	MIMAT0017282	mmu-miR-544-5p	19.5559	0.208222	0.387375	0.53752	0.590909	0.937027	16.1784	4.11062	23.4882	31.8498	14.8796	21.4872	25.4138	20.2144	19.5521	15.9035	22.0368
chr12:109733819-109733840	MIMAT0004691	mmu-miR-382-3p	103.117	-0.184172	0.339692	-0.542174	0.587699	0.937027	102.954	42.1338	95.0204	221.769	90.6302	109.155	128.952	98.9063	70.8762	81.108	92.7867
chr12:109734184-109734203	MIMAT0016985	mmu-miR-134-3p	55.7975	-0.134966	0.274072	-0.492448	0.622403	0.937027	73.5384	31.8573	69.3969	54.2626	64.9291	54.1477	44.2389	79.4138	50.1021	37.3733	54.5122
chr12:109738474-109738495	MIMAT0004537	mmu-miR-154-3p	10.6621	0.186491	0.411338	0.453376	0.650278	0.937027	16.1784	4.11062	8.54116	12.9758	8.79248	10.3139	16.0013	12.995	8.55402	9.54212	9.27867
chr12:117250860-117250881	MIMAT0000163	mmu-miR-153-3p	7749	0.201635	0.374736	0.538073	0.590526	0.937027	7068.51	1250.66	11549.8	8848.34	7097.56	8225.3	7061.27	9580.91	8500.25	7337.89	8718.47
chr14:54643050-54643070	MIMAT0027797	mmu-miR-6948-3p	24.2105	-0.154156	0.304521	-0.506223	0.6127	0.937027	29.4154	24.6637	25.6235	20.0536	27.7301	13.7518	15.06	21.6583	34.2161	28.6264	25.5163
chr14:70443557-70443578	MIMAT0000666	mmu-miR-320-3p	545.261	-0.127255	0.274453	-0.463668	0.642886	0.937027	438.289	979.355	419.585	629.918	390.927	462.405	567.575	373.967	540.125	753.828	441.897
chr15:73254820-73254840	MIMAT0000161	mmu-miR-151-3p	22563.9	-0.117896	0.258811	-0.455528	0.648729	0.937027	21995.3	37430.3	21633.7	13056	23747.8	20800.5	13940.9	23183	28274.7	23955.5	20184.6
chr15:89305658-89305679	MIMAT0027819	mmu-miR-6959-3p	0.75111	0.931567	1.82026	0.511776	0.608808	0.937027	2.94154	0	0	0	0	0.859488	0	0	3.66601	0.795177	0
chr16:13449533-13449554	MIMAT0017271	mmu-miR-193b-5p	3.02569	-0.380564	0.772765	-0.492471	0.622387	0.937027	5.88307	1.02765	7.47352	2.35924	0.676345	2.57846	1.8825	1.44389	4.88801	1.59035	3.4795
chr16:18284248-18284268	MIMAT0009411	mmu-miR-1306-3p	1.83512	0.392595	0.855877	0.458705	0.646446	0.937027	1.47077	1.02765	2.13529	1.17962	2.02903	1.71898	3.76501	2.88777	1.222	1.59035	1.15983
chr16:42303386-42303406	MIMAT0025586	mmu-miR-6540-3p	23.7397	0.161816	0.3805	0.425273	0.670637	0.937027	20.5907	15.4148	14.947	47.1849	14.2032	18.9087	40.4738	25.99	19.5521	20.6746	23.1967
chr16:77599672-77599693	MIMAT0000523_1	mmu-let-7c-5p	5734.02	-0.112515	0.215221	-0.522791	0.601119	0.937027	6962.61	9071.11	4090.15	4632.37	5138.19	5739.66	5825.41	4969.14	5018.77	6422.64	5204.17
chr16:97877233-97877252	MIMAT0027829	mmu-miR-6964-3p	1.24962	0.582156	1.14209	0.509727	0.610243	0.937027	0	2.05531	0	1.17962	1.35269	0.859488	1.8825	0	3.66601	1.59035	1.15983
chr17:17830232-17830253	MIMAT0004525	mmu-miR-99b-3p	134.369	-0.0880786	0.185531	-0.474737	0.634974	0.937027	91.1876	137.706	170.823	162.788	130.535	116.031	131.775	126.34	141.752	141.541	127.582
chr18:34759575-34759595	MIMAT0049851	mmu-miR-12191-3p	4.56148	0.250609	0.58846	0.425873	0.6702	0.937027	4.4123	3.08296	4.27058	5.89811	3.38172	4.29744	1.8825	9.38526	6.11002	3.97588	3.4795
chr18:37854605-37854625	MIMAT0027861	mmu-miR-6979-3p	2.44443	-0.418685	0.844944	-0.495518	0.620235	0.937027	2.94154	5.13827	3.20294	1.17962	2.02903	1.71898	0	5.0536	2.44401	3.18071	0
chr18:60958120-60958140	MIMAT0027867	mmu-miR-6982-3p	5.4231	0.24504	0.555753	0.440915	0.659275	0.937027	4.4123	7.19358	5.33823	2.35924	5.41076	5.15693	7.53002	10.8292	2.44401	3.18071	5.79917
chr18:61397838-61397858	MIMAT0003151	mmu-miR-378a-3p	6761.6	-0.0811092	0.159896	-0.507261	0.611972	0.937027	5769.82	8049.62	8020.15	6717.94	6289.33	5979.46	6940.79	5644.88	6317.76	8482.15	6165.67
chr18:61647866-61647888	MIMAT0000157	mmu-miR-145a-5p	316.026	-0.135031	0.265982	-0.507669	0.611685	0.937027	266.209	533.353	300.008	250.08	311.119	338.638	424.505	294.553	178.412	233.782	345.63
chr19:46342790-46342811	MIMAT0003475	mmu-miR-146b-5p	5164.6	0.105056	0.204547	0.513604	0.607529	0.937027	6725.82	4592.59	3925.73	3578.97	5977.54	6027.59	4754.26	4652.93	5712.86	4386.99	6475.35
chr19:58911686-58911707	MIMAT0014881	mmu-miR-3086-3p	2.61778	0.367995	0.821296	0.448066	0.654105	0.937027	2.94154	4.11062	1.06765	1.17962	2.02903	2.57846	0	1.44389	2.44401	6.36141	4.63933
chr2:18057846-18057867	MIMAT0029816	mmu-miR-7655-5p	0.795514	0.773037	1.59502	0.484658	0.627919	0.937027	1.47077	0	0	0	1.35269	0	0	0	1.222	2.38553	2.31967
chr2:29845645-29845666	MIMAT0022841	mmu-miR-219a-2-3p	725.99	-0.188561	0.359735	-0.524165	0.600164	0.937027	725.088	846.788	696.105	1156.03	466.002	489.049	379.325	874.274	1399.19	625.804	328.233
chr2:29845647-29845668	MIMAT0029806	mmu-miR-219b-5p	736.977	-0.182752	0.3595	-0.508351	0.611207	0.937027	730.972	856.036	712.119	1170.18	471.412	495.925	389.678	886.547	1423.63	638.527	331.712
chr2:29995955-29995976	MIMAT0027896	mmu-miR-6997-5p	0.950473	-0.649119	1.38415	-0.468967	0.639093	0.937027	1.47077	3.08296	0	0	1.35269	0	0.941252	0	1.222	2.38553	0
chr2:92387384-92387405	MIMAT0027903	mmu-miR-7000-3p	3.96253	-0.360869	0.700905	-0.514861	0.60665	0.937027	2.94154	7.19358	4.27058	8.25735	0	2.57846	2.82376	3.60972	4.88801	2.38553	4.63933
chr2:94261316-94261340	MIMAT0017242	mmu-miR-670-3p	30.3422	0.27722	0.572041	0.484617	0.627948	0.937027	7.35384	4.11062	50.1793	62.5199	12.1742	18.0492	40.4738	28.8777	24.4401	61.2286	24.3565
chr2:122640850-122640871	MIMAT0004857	mmu-miR-147-3p	5.20352	0.293861	0.569311	0.516171	0.605735	0.937027	5.88307	1.02765	4.27058	5.89811	6.0871	6.8759	9.41252	3.60972	2.44401	4.77106	6.959
chr2:180894045-180894066	MIMAT0004527_1	mmu-miR-124-5p	10.6788	0.202393	0.409121	0.494702	0.620811	0.937027	10.2954	11.3042	4.27058	12.9758	10.8215	12.0328	15.06	11.5511	10.998	13.518	4.63933
chr2:181587900-181587919	MIMAT0027917	mmu-miR-7006-3p	5.387	0.250194	0.542931	0.460822	0.644926	0.937027	4.4123	4.11062	3.20294	3.53886	8.79248	5.15693	3.76501	7.94138	6.11002	8.74694	3.4795
chr3:90070030-90070051	MIMAT0004852	mmu-miR-190b-5p	9.00188	0.190234	0.447268	0.425325	0.6706	0.937027	10.2954	6.16593	6.40587	8.25735	10.1452	11.1733	8.47127	8.66332	14.664	3.18071	11.5983
chr4:88122057-88122078	MIMAT0003486	mmu-miR-491-5p	9.35547	0.189741	0.424746	0.446716	0.65508	0.937027	5.88307	9.24889	10.6765	5.89811	10.8215	6.01642	14.1188	8.66332	8.55402	7.95177	15.0778
chr4:118210505-118210527	MIMAT0028421	mmu-miR-7226-3p	36.8847	-0.144417	0.268893	-0.537081	0.591211	0.937027	47.0646	44.1892	26.6911	36.5683	39.9044	45.5529	32.0026	25.99	26.8841	31.0119	49.8728
chr4:120973259-120973279	MIMAT0027935	mmu-miR-7015-3p	87.207	-0.0952032	0.200174	-0.475603	0.634357	0.937027	57.3599	117.153	91.8175	95.5493	88.6012	78.2134	80.0064	81.5796	89.2062	98.6019	81.1883
chr4:150068517-150068537	MIMAT0017022	mmu-miR-34a-3p	1.02077	-0.640444	1.30293	-0.491543	0.623043	0.937027	1.47077	0	0	1.17962	3.38172	0.859488	0	0	1.222	0.795177	2.31967
chr5:9375748-9375769	MIMAT0004843	mmu-miR-879-3p	48.6333	0.115942	0.23515	0.493056	0.621973	0.937027	42.6523	44.1892	40.5705	61.3403	43.9624	42.1149	70.5939	54.1458	48.8801	38.9637	47.5532
chr5:24592132-24592154	MIMAT0003731	mmu-miR-671-5p	51.0852	0.139591	0.298501	0.46764	0.640042	0.937027	54.4184	18.4978	50.1793	71.9569	48.0205	48.1313	46.1214	71.4724	53.7681	56.4576	42.9138
chr5:48223966-48223986	MIMAT0000663_1	mmu-miR-218-5p	2646.36	0.134493	0.251942	0.533824	0.593463	0.937027	3100.38	1141.72	3111.12	2558.6	2651.27	3011.65	2858.58	3368.59	2687.18	1909.22	2711.69
chr5:64970364-64970385	MIMAT0004894	mmu-miR-574-3p	54.9052	-0.138472	0.277076	-0.499763	0.617242	0.937027	45.5938	100.71	52.3146	38.9275	50.7259	37.8175	65.8877	49.8141	50.1021	54.072	57.9917
chr5:139369673-139369695	MIMAT0004649	mmu-miR-339-3p	65.6142	0.164616	0.327613	0.502471	0.615336	0.937027	39.7107	41.1062	51.247	115.603	60.1947	60.1642	114.833	52.7019	47.6581	74.7466	63.7908
chr6:30741314-30741336	MIMAT0000766	mmu-miR-335-5p	1350.18	-0.151332	0.286444	-0.528312	0.597283	0.937027	1776.69	639.201	1145.58	1961.71	1615.79	1574.58	1459.88	1241.74	1079.03	779.273	1578.53
chr6:71271745-71271764	MIMAT0031418	mmu-miR-8112	15.9826	0.259355	0.487042	0.532511	0.594372	0.937027	7.35384	27.7467	17.0823	10.6166	9.46883	8.59488	16.9425	11.5511	14.664	41.3492	10.4385
chr6:125195845-125195865	MIMAT0014918	mmu-miR-3098-3p	1.52442	0.473214	1.10748	0.42729	0.669168	0.937027	0	3.08296	2.13529	1.17962	0	3.43795	0.941252	3.60972	1.222	0	1.15983
chr7:44470391-44470411	MIMAT0028009	mmu-miR-7052-3p	13.4999	0.183116	0.415089	0.441148	0.659106	0.937027	8.82461	19.5254	5.33823	16.5147	12.1742	17.1898	6.58877	14.4389	23.2181	11.9277	12.7582
chr7:45126925-45126945	MIMAT0020629	mmu-miR-5121	8.04158	0.26242	0.616684	0.425535	0.670447	0.937027	20.5907	3.08296	5.33823	5.89811	2.70538	6.01642	16.9425	7.21943	3.66601	13.518	3.4795
chr7:45173339-45173361	MIMAT0028015	mmu-miR-7055-3p	0.877755	-0.712889	1.40941	-0.505806	0.612993	0.937027	0	1.02765	2.13529	0	2.02903	0.859488	0	0	2.44401	0	1.15983
chr7:53891796-53891817	MIMAT0024859	mmu-miR-6238	69.0536	-0.247877	0.549079	-0.451441	0.651672	0.937027	220.615	58.5763	52.3146	23.5924	23.6721	106.577	71.5352	32.4875	51.3241	21.4698	97.426
chr7:141221445-141221466	MIMAT0017052	mmu-miR-210-5p	21.9866	0.197228	0.390013	0.505697	0.61307	0.937027	7.35384	18.4978	32.0294	17.6943	25.0248	15.4708	26.3551	33.2094	26.8841	10.3373	28.9958
chr7:142654968-142654989	MIMAT0004782	mmu-miR-483-5p	1.86676	-0.434594	0.968849	-0.448568	0.653744	0.937027	1.47077	2.05531	4.27058	2.35924	0.676345	0	2.82376	1.44389	0	0.795177	4.63933
chr8:13189035-13189055	MIMAT0017350	mmu-miR-1968-3p	0.774399	-0.695821	1.4642	-0.475222	0.634629	0.937027	0	3.08296	1.06765	0	0.676345	0	0.941252	0	0	1.59035	1.15983
chr8:23142587-23142608	MIMAT0003130	mmu-miR-486a-5p	18221.2	-0.132252	0.309669	-0.427076	0.669324	0.937027	9215.83	31545.9	20203.1	14843.2	19867.6	11744.9	19562	12848.4	26917.1	20475.8	13209.3
chr8:23142629-23142649	MIMAT0017206	mmu-miR-486a-3p	18084.5	-0.145227	0.30563	-0.475173	0.634664	0.937027	9287.9	31210.9	20319.4	14957.6	19628.2	11699.3	19280.6	12851.3	26243.7	20442.4	13007.5
chr8:23142627-23142648	MIMAT0014943	mmu-miR-486b-5p	18084.5	-0.145227	0.30563	-0.475173	0.634664	0.937027	9287.9	31210.9	20319.4	14957.6	19628.2	11699.3	19280.6	12851.3	26243.7	20442.4	13007.5
chr8:23142587-23142606	MIMAT0014944	mmu-miR-486b-3p	18221.2	-0.132252	0.309669	-0.427076	0.669324	0.937027	9215.83	31545.9	20203.1	14843.2	19867.6	11744.9	19562	12848.4	26917.1	20475.8	13209.3
chr8:72470016-72470036	MIMAT0028043	mmu-miR-7068-3p	95.6466	0.14064	0.308184	0.45635	0.648139	0.937027	79.4215	134.623	87.5469	74.3161	77.1033	70.478	66.8289	75.0821	111.202	190.842	84.6678
chr8:107551288-107551308	MIMAT0000152	mmu-miR-140-3p	2034.21	0.0803105	0.173375	0.463218	0.643208	0.937027	1717.86	2034.76	1670.86	2536.19	1903.23	1747.34	2625.15	1856.84	1778.01	2217.75	2288.35
chr8:111016498-111016521	MIMAT0020632	mmu-miR-3473d	1.98414	0.437587	0.881952	0.496157	0.619783	0.937027	2.94154	1.02765	1.06765	1.17962	2.02903	0	3.76501	1.44389	3.66601	2.38553	2.31967
chr9:67236700-67236721	MIMAT0000220	mmu-miR-190a-5p	102.344	0.137127	0.278032	0.493206	0.621867	0.937027	82.363	42.1338	98.2234	136.836	125.124	106.577	144.953	101.794	100.204	86.6743	100.906
chr9:106154179-106154200	MIMAT0004531	mmu-miR-135a-1-3p	20.6759	-0.187384	0.418396	-0.447861	0.654253	0.937027	25.0031	38.0232	13.8794	10.6166	22.9957	27.5036	21.6488	14.4389	7.33202	13.518	32.4753
chr9:108568367-108568388	MIMAT0004542	mmu-miR-191-3p	63.4509	0.0953383	0.21216	0.44937	0.653165	0.937027	73.5384	44.1892	80.0734	49.5441	59.5184	57.5857	68.7114	72.1943	63.5442	67.59	61.4712
chr9:108568830-108568850	MIMAT0001342	mmu-miR-425-3p	43.174	-0.160008	0.342234	-0.467539	0.640115	0.937027	36.7692	48.2998	39.5029	71.9569	33.1409	34.3795	82.8302	34.6533	28.1061	39.7588	25.5163
chrX:7807180-7807201	MIMAT0017332	mmu-miR-1198-3p	2.8971	0.329197	0.72077	0.45673	0.647865	0.937027	2.94154	1.02765	3.20294	3.53886	2.02903	2.57846	4.70626	0.721943	3.66601	3.97588	3.4795
chrX:20863160-20863182	MIMAT0022361	mmu-miR-5617-5p	0.944397	-0.667493	1.3617	-0.49019	0.623999	0.937027	0	1.02765	0	3.53886	1.35269	1.71898	0	0	0	1.59035	1.15983
chrX:52741697-52741718	MIMAT0000708	mmu-miR-363-3p	5.10007	0.247828	0.555924	0.445795	0.655746	0.937027	1.47077	4.11062	8.54116	4.71849	4.05807	6.01642	9.41252	4.33166	3.66601	3.97588	5.79917
chrX:66801954-66801975	MIMAT0004846	mmu-miR-881-3p	1.52177	0.525354	1.18009	0.445181	0.656189	0.937027	2.94154	0	0	1.17962	2.02903	4.29744	0	0	1.222	1.59035	3.4795
chrX:66810438-66810460	MIMAT0017265	mmu-miR-871-3p	7.77457	-0.315588	0.574392	-0.54943	0.58271	0.937027	14.7077	5.13827	5.33823	1.17962	16.9086	12.0328	7.53002	6.49749	4.88801	3.18071	8.11883
chrX:67988383-67988403	MIMAT0003173	mmu-miR-547-3p	2.75713	0.33289	0.713433	0.466603	0.640784	0.937027	2.94154	4.11062	1.06765	1.17962	2.70538	2.57846	1.8825	4.33166	3.66601	2.38553	3.4795
chrX:103573075-103573096	MIMAT0003728	mmu-miR-374b-3p	34.1502	0.142109	0.273679	0.519255	0.603583	0.937027	41.1815	15.4148	39.5029	29.4905	36.5226	40.3959	29.1788	38.9849	37.8821	35.783	31.3155
chrX:103573086-103573105	MIMAT0014953	mmu-miR-374c-5p	34.1502	0.142109	0.273679	0.519255	0.603583	0.937027	41.1815	15.4148	39.5029	29.4905	36.5226	40.3959	29.1788	38.9849	37.8821	35.783	31.3155
chr11:79711975-79711996	MIMAT0004544	mmu-miR-193a-5p	0.862274	-0.654426	1.5628	-0.418752	0.675397	0.937209	0	0	0	1.17962	4.05807	0.859488	0	2.16583	1.222	0	0
chr18:61649233-61649253	MIMAT0017006	mmu-miR-143-5p	8.34412	0.174853	0.4181	0.418208	0.675795	0.937209	5.88307	8.22124	6.40587	9.43697	8.79248	9.45437	12.2363	7.21943	6.11002	8.74694	9.27867
chr3:122293649-122293671	MIMAT0017245	mmu-miR-760-5p	2.04766	-0.35698	0.847821	-0.421056	0.673715	0.937209	1.47077	5.13827	2.13529	2.35924	0.676345	2.57846	0.941252	2.88777	1.222	0.795177	2.31967
chr7:61837323-61837345	MIMAT0014928	mmu-miR-344c-3p	66.5172	-0.133632	0.319697	-0.417994	0.675951	0.937209	45.5938	40.0785	83.2763	122.681	57.4893	48.9908	73.4177	45.4824	91.6502	73.1563	49.8728
chr8:84178759-84178781	MIMAT0004324	mmu-miR-181d-5p	17792.8	0.0872097	0.207755	0.419772	0.674652	0.937209	18718.5	21704.1	14048.1	16559.5	15010.8	14790.9	17358.6	15667.6	19150	27878.9	14834.3
chr5:136105583-136105603	MIMAT0027975	mmu-miR-7035-3p	2.95006	-0.305694	0.745685	-0.409951	0.681842	0.942908	2.94154	3.08296	1.06765	8.25735	1.35269	0.859488	2.82376	2.16583	2.44401	3.97588	3.4795
chr7:62046183-62046203	MIMAT0014932	mmu-miR-344f-3p	21.0165	0.131913	0.322105	0.409534	0.682148	0.942908	26.4738	13.3595	19.2176	27.1313	14.8796	18.9087	30.1201	15.8828	20.7741	27.036	17.3975
chr12:109611877-109611901	MIMAT0017328	mmu-miR-1188-3p	1.09783	-0.445056	1.09328	-0.407084	0.683946	0.943951	1.47077	2.05531	1.06765	1.17962	0.676345	0.859488	0.941252	1.44389	1.222	0	1.15983
chr15:89185465-89185487	MIMAT0027817	mmu-miR-6958-3p	5.42704	0.220148	0.543671	0.404929	0.68553	0.944694	2.94154	7.19358	4.27058	8.25735	2.70538	7.73539	5.64751	5.0536	3.66601	8.74694	3.4795
chr12:109722770-109722790	MIMAT0003183	mmu-miR-376c-3p	142.415	0.117147	0.290928	0.402667	0.687193	0.945544	136.781	60.6316	131.32	187.56	164.352	133.221	216.488	170.379	125.866	93.8309	146.139
chr11:4891350-4891372	MIMAT0027736	mmu-miR-6918-5p	0.962112	-0.596752	1.51859	-0.392965	0.694346	0.94674	2.94154	3.08296	0	0	0	0	0	1.44389	0	0.795177	2.31967
chr15:79375271-79375293	MIMAT0009408	mmu-miR-1943-5p	20.2592	0.126054	0.318568	0.39569	0.692334	0.94674	22.0615	31.8573	13.8794	14.1555	14.8796	19.7682	20.7075	19.4925	17.108	22.265	26.6762
chr16:44558058-44558080	MIMAT0014871	mmu-miR-3081-3p	7.09384	0.233742	0.584364	0.399995	0.68916	0.94674	4.4123	4.11062	9.60881	5.89811	7.43979	4.29744	10.3538	2.16583	13.442	2.38553	13.918
chr3:88215226-88215247	MIMAT0014908	mmu-miR-3093-3p	2.18146	-0.361239	0.918906	-0.393119	0.694232	0.94674	1.47077	7.19358	2.13529	0	1.35269	0	2.82376	1.44389	3.66601	1.59035	2.31967
chr7:81529958-81529980	MIMAT0009457	mmu-miR-1839-3p	92.6132	0.0807691	0.204239	0.395464	0.692501	0.94674	119.132	89.406	82.2087	87.292	73.0453	124.626	96.0077	81.5796	100.204	89.855	75.3892
chrX:147010614-147010635	MIMAT0014802	mmu-miR-1264-5p	3.92167	-0.322914	0.810251	-0.398536	0.690235	0.94674	0	0	7.47352	9.43697	4.73441	0.859488	3.76501	3.60972	8.55402	2.38553	2.31967
chr2:26470094-26470114	MIMAT0027894	mmu-miR-6996-5p	1.73779	0.358142	0.921898	0.388484	0.697658	0.948395	1.47077	2.05531	2.13529	1.17962	0.676345	2.57846	0	1.44389	3.66601	1.59035	2.31967
chr9:51103610-51103632	MIMAT0000382	mmu-miR-34b-5p	28.1742	0.149922	0.385626	0.388777	0.697441	0.948395	17.6492	13.3595	21.3529	57.8014	22.9957	24.9252	45.1801	21.6583	19.5521	31.8071	33.6352
chr17:34025010-34025031	MIMAT0017055	mmu-miR-219a-1-3p	14.3482	-0.147338	0.382231	-0.385468	0.69989	0.948577	8.82461	27.7467	12.8117	12.9758	12.8506	15.4708	10.3538	10.1072	19.5521	16.6987	10.4385
chr17:34025012-34025033	MIMAT0029892	mmu-miR-219c-5p	14.3482	-0.147338	0.382231	-0.385468	0.69989	0.948577	8.82461	27.7467	12.8117	12.9758	12.8506	15.4708	10.3538	10.1072	19.5521	16.6987	10.4385
chr10:44359692-44359714	MIMAT0009392	mmu-miR-1929-5p	1.2778	0.417612	1.09275	0.382165	0.702339	0.950471	1.47077	0	2.13529	1.17962	0.676345	0	1.8825	0.721943	2.44401	2.38553	1.15983
chr1:151442430-151442450	MIMAT0029885	mmu-miR-7682-3p	0.720046	-0.604576	1.63175	-0.370507	0.711005	0.953737	1.47077	2.05531	1.06765	0	0	0	0.941252	0	0	2.38553	0
chr1:162223438-162223459	MIMAT0000661	mmu-miR-214-3p	4.39439	-0.243691	0.668102	-0.364751	0.715298	0.953737	0	8.22124	3.20294	3.53886	8.11614	1.71898	3.76501	5.0536	7.33202	1.59035	5.79917
chr12:87437724-87437747	MIMAT0014842	mmu-miR-3068-5p	52.1786	0.0943946	0.253288	0.372678	0.709388	0.953737	54.4184	35.9679	48.044	69.5977	44.6388	47.2718	69.6527	67.1407	54.9901	38.1685	44.0737
chr12:109726870-109726891	MIMAT0000746	mmu-miR-381-3p	17048.7	-0.0972618	0.263632	-0.36893	0.71218	0.953737	13289.9	8762.81	19344.7	30341	16648.2	14842.5	16316.6	16972.2	18069.8	17617.1	15330.7
chr12:109734733-109734756	MIMAT0017237	mmu-miR-668-5p	1.53142	-0.391124	1.06054	-0.368795	0.71228	0.953737	0	2.05531	1.06765	3.53886	2.02903	0	0.941252	3.60972	2.44401	0	1.15983
chr18:65248866-65248887	MIMAT0000246	mmu-miR-122-5p	2.80261	-0.286788	0.775469	-0.369825	0.711513	0.953737	0	4.11062	3.20294	5.89811	2.02903	0.859488	0.941252	1.44389	4.88801	3.97588	3.4795
chr18:65248865-65248886	MIMAT0049853	mmu-miR-122b-3p	2.80261	-0.286788	0.775469	-0.369825	0.711513	0.953737	0	4.11062	3.20294	5.89811	2.02903	0.859488	0.941252	1.44389	4.88801	3.97588	3.4795
chr4:36668565-36668586	MIMAT0025177	mmu-miR-873b	2580.85	0.106104	0.292575	0.362655	0.716863	0.953737	2832.7	1649.39	1601.47	2729.64	3574.48	2815.68	2951.77	3073.31	2742.18	1125.97	3292.77
chr4:36668556-36668576	MIMAT0004936	mmu-miR-873a-5p	2580.85	0.106104	0.292575	0.362655	0.716863	0.953737	2832.7	1649.39	1601.47	2729.64	3574.48	2815.68	2951.77	3073.31	2742.18	1125.97	3292.77
chr4:148146937-148146958	MIMAT0027949	mmu-miR-7022-3p	1.44932	-0.404612	1.09161	-0.370657	0.710893	0.953737	0	4.11062	0	1.17962	2.70538	0.859488	2.82376	0.721943	1.222	0	2.31967
chrX:72992113-72992133	MIMAT0011213	mmu-miR-2137	18.2865	0.210651	0.58204	0.361919	0.717412	0.953737	33.8277	28.7743	9.60881	8.25735	4.05807	24.9252	19.7663	5.0536	26.8841	6.36141	33.6352
chrX:142739020-142739043	MIMAT0017260	mmu-miR-652-5p	2.71054	-0.312001	0.849253	-0.367383	0.713334	0.953737	2.94154	1.02765	0	9.43697	2.02903	0.859488	4.70626	2.88777	1.222	2.38553	2.31967
chr12:109715624-109715645	MIMAT0017248	mmu-miR-679-3p	1.09426	0.45325	1.26256	0.358994	0.719599	0.955239	1.47077	1.02765	0	0	2.02903	0	1.8825	3.60972	1.222	0.795177	0
chr11:74868127-74868147	MIMAT0027753	mmu-miR-6926-3p	1.31792	-0.483996	1.35457	-0.357306	0.720862	0.955424	0	7.19358	0	0	0.676345	2.57846	0.941252	0.721943	0	2.38553	0
chrX:134757711-134757731	MIMAT0028093	mmu-miR-7093-3p	2.34573	0.286677	0.805309	0.355984	0.721853	0.955424	2.94154	0	4.27058	1.17962	2.02903	1.71898	2.82376	2.16583	2.44401	1.59035	4.63933
chr15:98519828-98519853	MIMAT0031397	mmu-miR-1291	12.6211	-0.184955	0.522036	-0.354296	0.723117	0.955699	23.5323	7.19358	23.4882	9.43697	4.73441	24.9252	14.1188	7.94138	9.77603	5.56624	8.11883
chrX:7248419-7248440	MIMAT0004781	mmu-miR-532-3p	46.2035	0.0815923	0.231327	0.352714	0.724303	0.955868	48.5353	47.2721	48.044	43.646	37.8753	44.6934	63.0639	44.7605	31.7721	55.6624	42.9138
chr6:125195807-125195828	MIMAT0014917	mmu-miR-3098-5p	1.54598	0.336856	0.967495	0.348173	0.72771	0.958961	0	1.02765	3.20294	1.17962	1.35269	1.71898	2.82376	2.88777	1.222	1.59035	0
chr7:128288370-128288391	MIMAT0014938	mmu-miR-3103-3p	5.91778	0.171862	0.496118	0.346414	0.729032	0.958961	5.88307	8.22124	5.33823	4.71849	4.05807	6.01642	7.53002	8.66332	3.66601	6.36141	4.63933
chr8:107096025-107096045	MIMAT0028057	mmu-miR-7075-3p	8.38281	-0.150718	0.436416	-0.345353	0.729829	0.958961	14.7077	6.16593	9.60881	7.07773	7.43979	5.15693	5.64751	8.66332	7.33202	11.1325	9.27867
chr7:141992218-141992240	MIMAT0014940	mmu-miR-3104-3p	3.03648	-0.257326	0.750056	-0.343076	0.731542	0.959817	1.47077	4.11062	4.27058	2.35924	4.05807	4.29744	0	3.60972	6.11002	0.795177	2.31967
chr2:31612426-31612447	MIMAT0027898	mmu-miR-6998-5p	0.742183	0.508383	1.48888	0.341454	0.732762	0.960024	1.47077	1.02765	0	0	0.676345	0	0	1.44389	0	2.38553	1.15983
chr9:108568789-108568811	MIMAT0004750	mmu-miR-425-5p	866.353	-0.0527746	0.157148	-0.335826	0.737002	0.964182	708.91	1025.6	860.522	990.882	832.581	753.771	919.603	834.567	729.536	1050.43	823.482
chr3:95004173-95004194	MIMAT0027930	mmu-miR-7013-5p	1.74257	-0.300319	0.907224	-0.331031	0.740621	0.967084	1.47077	3.08296	2.13529	2.35924	0.676345	1.71898	0	2.16583	2.44401	0.795177	2.31967
chrX:96242842-96242864	MIMAT0017056	mmu-miR-223-5p	1.04158	0.459747	1.39295	0.330053	0.74136	0.967084	0	2.05531	2.13529	0	0	1.71898	0	0.721943	3.66601	0	1.15983
chr10:80828848-80828870	MIMAT0009460	mmu-miR-1982-3p	13.3856	0.164708	0.507037	0.324844	0.745299	0.968266	5.88307	16.4425	7.47352	12.9758	18.9377	16.3303	5.64751	4.33166	28.1061	20.6746	10.4385
chr12:109709102-109709123	MIMAT0017080	mmu-miR-379-3p	107.477	-0.0554469	0.172706	-0.321047	0.748174	0.968266	132.369	89.406	96.0881	110.884	120.389	115.171	99.7727	109.735	100.204	92.2405	115.983
chr12:109727347-109727367	MIMAT0017216	mmu-miR-487b-5p	9.9417	0.151393	0.46685	0.324286	0.745721	0.968266	13.2369	15.4148	1.06765	7.07773	10.1452	7.73539	10.3538	13.7169	12.22	7.95177	10.4385
chr12:109740553-109740574	MIMAT0000741	mmu-miR-377-3p	239.308	-0.0958186	0.299093	-0.320364	0.748692	0.968266	236.794	97.6272	231.679	428.203	246.19	222.607	294.612	259.178	200.409	177.324	237.766
chr13:55507627-55507647	MIMAT0027791	mmu-miR-6945-3p	6.84081	0.159356	0.495378	0.321685	0.747691	0.968266	5.88307	6.16593	9.60881	7.07773	3.38172	4.29744	5.64751	7.21943	13.442	5.56624	6.959
chr15:38490522-38490542	MIMAT0027802	mmu-miR-6951-5p	0.96405	-0.442409	1.36736	-0.323551	0.746278	0.968266	0	1.02765	1.06765	0	3.38172	0.859488	1.8825	0	0	2.38553	0
chr11:75173443-75173464	MIMAT0000659	mmu-miR-212-3p	2924.13	-0.0616484	0.193933	-0.317885	0.750572	0.969123	3591.61	2833.24	2650.96	2112.7	3772.65	3563.44	3099.54	2687.07	2916.92	2150.16	2787.08
chrX:105379105-105379126	MIMAT0004640	mmu-miR-325-3p	62.9128	0.0662167	0.209107	0.316664	0.751499	0.969123	70.5969	60.6316	69.3969	49.5441	57.4893	60.1642	51.7689	60.6432	58.6562	85.8791	67.2703
chr12:109723786-109723807	MIMAT0003387	mmu-miR-376a-5p	248.943	-0.12931	0.410356	-0.315117	0.752673	0.969254	180.904	96.5996	233.814	574.476	220.488	191.666	474.391	251.236	130.754	186.867	197.172
chr11:68990638-68990659	MIMAT0014830	mmu-miR-3062-5p	1.62173	0.307529	0.984167	0.312477	0.754678	0.970454	2.94154	3.08296	0	0	1.35269	1.71898	0.941252	1.44389	1.222	3.97588	1.15983
chr15:101369364-101369387	MIMAT0009405	mmu-miR-1941-5p	1.16931	0.408333	1.33043	0.306918	0.758906	0.971743	0	3.08296	0	1.17962	0.676345	3.43795	0	2.16583	0	0	2.31967
chr2:38853883-38853904	MIMAT0017084	mmu-miR-181b-2-3p	5.25065	0.206474	0.666927	0.309591	0.756872	0.971743	4.4123	0	8.54116	9.43697	2.02903	3.43795	6.58877	2.16583	8.55402	7.95177	4.63933
chrX:53054306-53054327	MIMAT0000548	mmu-miR-322-5p	298.403	0.068589	0.222917	0.307689	0.758319	0.971743	358.867	187.033	332.038	214.691	360.492	324.886	293.671	352.308	294.503	219.469	344.471
chr12:109713541-109713562	MIMAT0000567	mmu-miR-329-3p	85.3662	-0.0731011	0.239733	-0.304927	0.760422	0.972308	89.7168	134.623	59.7881	69.5977	84.5431	103.139	77.1827	83.7454	89.2062	62.819	84.6678
chr1:23291714-23291736	MIMAT0000514	mmu-miR-30c-5p	9403.55	-0.0357656	0.164101	-0.217948	0.827469	0.974159	10329.2	8956.01	8321.23	9244.69	10803.9	8944.69	12348.3	8817.1	7603.3	10264.9	7805.68
chr1:64042438-64042460	MIMAT0027699	mmu-miR-6899-3p	9.16664	0.131228	0.465016	0.282201	0.77779	0.974159	8.82461	11.3042	3.20294	7.07773	12.8506	14.6113	3.76501	10.1072	10.998	11.1325	6.959
chr1:153899989-153900009	MIMAT0031420	mmu-miR-8114	23.417	0.0892946	0.362077	0.246618	0.805204	0.974159	14.7077	46.2445	20.2853	14.1555	17.585	21.4872	17.8838	23.1022	21.9961	35.783	24.3565
chr1:158505651-158505671	MIMAT0003449	mmu-miR-488-5p	266.896	-0.0532602	0.226678	-0.23496	0.81424	0.974159	317.686	366.873	219.935	153.351	303.003	311.135	217.429	235.354	289.615	263.999	257.483
chr1:162217844-162217866	MIMAT0000229	mmu-miR-199a-5p	21.508	0.0937539	0.406021	0.230909	0.817386	0.974159	4.4123	17.4701	33.097	21.2332	26.3775	14.6113	29.1788	29.5997	29.3281	12.7228	18.5573
chr1:195037562-195037583	MIMAT0004632	mmu-miR-29c-5p	63.82	-0.0514486	0.203559	-0.252746	0.800465	0.974159	67.6553	57.5487	62.9911	80.2142	58.1657	59.3047	81.8889	59.9213	48.8801	62.819	62.631
chr10:101772740-101772761	MIMAT0014812	mmu-miR-3059-3p	0.963884	-0.335881	1.36863	-0.245415	0.806135	0.974159	1.47077	0	0	3.53886	0.676345	0	1.8825	1.44389	0	1.59035	0
chr10:128382882-128382900	MIMAT0027729	mmu-miR-6914-3p	2.39871	-0.200452	0.780803	-0.256726	0.79739	0.974159	4.4123	4.11062	1.06765	0	3.38172	3.43795	1.8825	2.16583	1.222	2.38553	2.31967
chr10:128458732-128458753	MIMAT0031409	mmu-miR-8105	1.98106	0.188093	0.881994	0.213259	0.831125	0.974159	2.94154	2.05531	2.13529	1.17962	1.35269	1.71898	1.8825	5.77555	0	1.59035	1.15983
chr11:43374435-43374456	MIMAT0000158	mmu-miR-146a-5p	1659.89	0.0673347	0.250628	0.268664	0.788189	0.974159	1997.3	1649.39	1645.24	765.574	2029.71	1660.53	1400.58	1486.48	2131.17	1377.25	2115.54
chr11:107637727-107637748	MIMAT0027764	mmu-miR-6932-5p	1.1844	0.339111	1.12454	0.301557	0.76299	0.974159	1.47077	1.02765	0	1.17962	1.35269	0.859488	0	0.721943	3.66601	1.59035	1.15983
chr12:44210350-44210373	MIMAT0022386	mmu-miR-5627-3p	1.00701	0.351943	1.38783	0.253593	0.79981	0.974159	0	0	3.20294	1.17962	0	1.71898	0.941252	0	2.44401	1.59035	0
chr12:85245923-85245944	MIMAT0027777	mmu-miR-6938-3p	1.22382	0.243459	1.01874	0.238981	0.81112	0.974159	0	1.02765	1.06765	1.17962	2.02903	0.859488	1.8825	1.44389	1.222	1.59035	1.15983
chr12:105031078-105031099	MIMAT0014845	mmu-miR-3069-3p	14.186	-0.109457	0.381594	-0.286842	0.774234	0.974159	20.5907	7.19358	20.2853	11.7962	14.2032	12.0328	19.7663	14.4389	14.664	7.15659	13.918
chr12:108836989-108837010	MIMAT0000595	mmu-miR-345-5p	105.165	0.0445622	0.206388	0.215915	0.829054	0.974159	100.012	112.014	81.141	133.297	91.3066	106.577	118.598	79.4138	94.0942	135.975	104.385
chr12:109592854-109592875	MIMAT0004530	mmu-miR-127-5p	1881.19	-0.0494187	0.211635	-0.23351	0.815366	0.974159	1892.88	1061.57	2015.71	2670.66	1941.79	1984.56	1761.08	2110.24	1820.78	1607.05	1826.74
chr12:109618305-109618326	MIMAT0001095	mmu-miR-370-3p	549.911	0.0436726	0.208477	0.209484	0.83407	0.974159	450.055	421.338	623.505	778.55	430.832	449.512	644.758	576.111	630.554	460.407	583.396
chr12:109709065-109709085	MIMAT0000743	mmu-miR-379-5p	884.533	-0.0551452	0.210619	-0.261825	0.793456	0.974159	1051.6	590.902	781.516	904.77	1184.96	886.992	911.132	860.557	962.938	592.407	1002.1
chr12:109718757-109718779	MIMAT0017249	mmu-miR-495-5p	2.26061	-0.180984	0.804852	-0.224866	0.822084	0.974159	0	5.13827	1.06765	2.35924	3.38172	1.71898	2.82376	3.60972	1.222	2.38553	1.15983
chr12:109724363-109724384	MIMAT0000378	mmu-miR-300-3p	8841.84	-0.0506246	0.20827	-0.243073	0.807949	0.974159	7824.48	5282.15	10484.3	12199.6	9265.93	8833.82	8839.3	9680.54	9249.34	7081.84	8518.98
chr12:109738438-109738459	MIMAT0000164	mmu-miR-154-5p	345.877	-0.0451038	0.160271	-0.281422	0.778387	0.974159	366.221	306.241	336.308	373.94	376.048	421.149	354.852	345.089	356.825	253.661	314.315
chr12:109743729-109743749	MIMAT0017172	mmu-miR-410-5p	4.81913	-0.175862	0.676347	-0.260017	0.794851	0.974159	1.47077	11.3042	1.06765	3.53886	8.11614	3.43795	5.64751	9.38526	1.222	3.18071	4.63933
chr12:110278058-110278078	MIMAT0014801	mmu-miR-1247-3p	2.26979	-0.245826	0.927809	-0.264954	0.791045	0.974159	4.4123	3.08296	3.20294	1.17962	0.676345	1.71898	0	0	2.44401	4.77106	3.4795
chr13:48538239-48538260	MIMAT0000521	mmu-let-7a-5p	10275.7	-0.0295336	0.132996	-0.222064	0.824264	0.974159	12083.8	11797.5	9099.54	8545.18	10427.9	10361.1	9763.61	9994.59	9562.17	11072	10324.8
chr13:63300529-63300549	MIMAT0000125	mmu-miR-23b-3p	2367.18	0.0581248	0.236176	0.246108	0.805598	0.974159	2878.29	2723.29	1844.89	1202.03	2927.22	2896.47	2275.01	2498.65	2315.7	1906.04	2571.35
chr14:46954905-46954925	MIMAT0025138	mmu-miR-378c	7.82772	-0.116412	0.422341	-0.275635	0.782828	0.974159	8.82461	10.2765	5.33823	8.25735	8.11614	8.59488	7.53002	6.49749	8.55402	7.15659	6.959
chr14:117953768-117953787	MIMAT0024860	mmu-miR-6239	12.4844	-0.119555	0.541907	-0.220618	0.82539	0.974159	26.4738	6.16593	18.15	10.6166	4.73441	19.7682	18.825	9.38526	6.11002	3.18071	13.918
chr15:73254855-73254875	MIMAT0004536	mmu-miR-151-5p	11143.1	0.0447628	0.206462	0.216809	0.828357	0.974159	12207.4	14339.9	9739.06	6282.66	12204	11426	9305.22	12040.6	12623.3	10751.6	11654
chr16:77646318-77646339	MIMAT0004529	mmu-miR-125b-2-3p	2495.83	0.042092	0.200048	0.21041	0.833348	0.974159	3138.62	1901.16	2278.35	2118.6	2844.03	2704.81	2027.46	2963.58	2795.94	1781.99	2899.58
chr17:26935518-26935539	MIMAT0027839	mmu-miR-6968-3p	1.2414	-0.27571	1.0956	-0.251652	0.80131	0.974159	1.47077	2.05531	1.06765	2.35924	0	0.859488	0	1.44389	2.44401	0.795177	1.15983
chr17:56418850-56418871	MIMAT0027857	mmu-miR-6977-3p	4.33691	-0.127018	0.57012	-0.222791	0.823698	0.974159	1.47077	4.11062	6.40587	5.89811	4.73441	5.15693	2.82376	4.33166	4.88801	5.56624	2.31967
chr17:80194913-80194932	MIMAT0049848	mmu-miR-12189-3p	6.19525	0.133901	0.490666	0.272897	0.784932	0.974159	4.4123	6.16593	9.60881	3.53886	5.41076	6.01642	6.58877	7.21943	9.77603	4.77106	4.63933
chr18:10785525-10785547	MIMAT0017326	mmu-miR-1b-3p	1.60022	0.292054	1.10991	0.263134	0.792448	0.974159	0	3.08296	1.06765	0	2.70538	3.43795	0.941252	2.88777	0	0	3.4795
chr18:10785523-10785545	MIMAT0017047	mmu-miR-1a-2-5p	1.60022	0.292054	1.10991	0.263134	0.792448	0.974159	0	3.08296	1.06765	0	2.70538	3.43795	0.941252	2.88777	0	0	3.4795
chr19:4263818-4263838	MIMAT0027873	mmu-miR-6985-3p	6.88697	0.15011	0.512702	0.292782	0.769689	0.974159	7.35384	11.3042	5.33823	7.07773	2.02903	6.01642	3.76501	7.94138	6.11002	9.54212	9.27867
chr19:6134802-6134822	MIMAT0049856	mmu-miR-12193-3p	1.79549	0.228953	0.923455	0.247931	0.804188	0.974159	1.47077	2.05531	0	3.53886	1.35269	2.57846	3.76501	1.44389	0	2.38553	1.15983
chr19:11923778-11923798	MIMAT0027891	mmu-miR-6994-3p	1.12892	-0.30687	1.21245	-0.2531	0.800191	0.974159	0	4.11062	0	0	2.02903	1.71898	1.8825	0.721943	0	0.795177	1.15983
chr19:34820737-34820759	MIMAT0017048	mmu-miR-107-5p	9.39431	-0.100316	0.423823	-0.236693	0.812895	0.974159	8.82461	6.16593	11.7441	8.25735	13.5269	6.01642	9.41252	9.38526	4.88801	13.518	11.5983
chr2:10514318-10514340	MIMAT0009421	mmu-miR-669o-5p	7.06109	0.113004	0.492294	0.229546	0.818444	0.974159	8.82461	6.16593	5.33823	11.7962	2.70538	9.45437	6.58877	9.38526	4.88801	5.56624	6.959
chr2:10518174-10518197	MIMAT0005841	mmu-miR-669h-5p	0.757029	0.482015	1.77278	0.271898	0.785701	0.974159	0	3.08296	0	0	0	2.57846	0	1.44389	1.222	0	0
chr2:25442780-25442800	MIMAT0014895	mmu-miR-3087-5p	0.837078	-0.420716	1.41279	-0.297792	0.765862	0.974159	1.47077	2.05531	0	0	1.35269	0	0.941252	2.16583	1.222	0	0
chr2:25442813-25442833	MIMAT0014896	mmu-miR-3087-3p	15.512	-0.0980133	0.335367	-0.292256	0.770091	0.974159	16.1784	8.22124	19.2176	18.8739	17.585	15.4708	12.2363	12.995	14.664	14.3132	20.877
chr2:67675496-67675516	MIMAT0028417	mmu-miR-7224-3p	96.2043	0.0582351	0.264843	0.219886	0.82596	0.974159	80.8922	139.761	82.2087	58.9811	107.539	83.3703	67.7702	85.9113	105.092	142.337	104.385
chr2:91944872-91944893	MIMAT0027901	mmu-miR-6999-3p	1.50704	0.308712	1.10637	0.279031	0.780221	0.974159	0	3.08296	1.06765	1.17962	1.35269	0	2.82376	5.0536	1.222	0.795177	0
chr2:92191994-92192018	MIMAT0009426	mmu-miR-1955-5p	2.72477	-0.18653	0.762875	-0.244509	0.806836	0.974159	2.94154	5.13827	4.27058	0	2.02903	2.57846	2.82376	0.721943	2.44401	2.38553	4.63933
chr2:174267512-174267535	MIMAT0017007	mmu-miR-298-3p	2.07768	-0.215267	0.938098	-0.229472	0.818502	0.974159	2.94154	0	6.40587	0	2.02903	2.57846	2.82376	2.16583	0	1.59035	2.31967
chr3:118433901-118433923	MIMAT0000149	mmu-miR-137-3p	1010.57	-0.0683001	0.287445	-0.237611	0.812183	0.974159	1351.64	456.279	1032.41	1407.29	937.414	1164.61	1033.49	1329.1	824.852	597.973	981.219
chr4:56895232-56895252	MIMAT0017050	mmu-miR-32-3p	2.45791	-0.204158	0.77742	-0.26261	0.792852	0.974159	1.47077	1.02765	3.20294	2.35924	4.73441	0.859488	3.76501	2.16583	1.222	1.59035	4.63933
chr4:120769584-120769606	MIMAT0000514_1	mmu-miR-30c-5p	7571.37	-0.0478418	0.161575	-0.296096	0.767156	0.974159	8174.53	7233.66	6901.26	7562.55	8671.42	7232.59	9895.38	7069.99	6056.25	8219.74	6267.74
chr4:138316132-138316154	MIMAT0027943	mmu-miR-7019-3p	5.53365	-0.158482	0.55842	-0.283805	0.77656	0.974159	2.94154	10.2765	5.33823	7.07773	3.38172	4.29744	6.58877	2.88777	3.66601	3.97588	10.4385
chr5:138165536-138165557	MIMAT0004636	mmu-miR-93-3p	12.4207	-0.100744	0.430601	-0.233962	0.815015	0.974159	10.2954	19.5254	13.8794	11.7962	9.46883	17.1898	18.825	10.8292	9.77603	12.7228	2.31967
chr5:138165746-138165767	MIMAT0004582	mmu-miR-106b-3p	202.097	-0.0484875	0.222515	-0.217907	0.827502	0.974159	144.135	262.052	207.123	241.822	173.821	163.303	227.783	167.491	207.741	273.541	154.258
chr6:51269829-51269850	MIMAT0000516	mmu-miR-148a-3p	15145.5	0.0637564	0.242333	0.263094	0.792478	0.974159	19137.6	9130.71	17354.6	14307.6	13976	15817.2	11074.8	18097	16783	10200.5	20721.6
chr6:118085243-118085263	MIMAT0027993	mmu-miR-7044-3p	10.2239	0.0940009	0.443139	0.212125	0.832009	0.974159	8.82461	17.4701	3.20294	11.7962	8.11614	16.3303	7.53002	10.1072	12.22	8.74694	8.11883
chr8:70102560-70102581	MIMAT0028036	mmu-miR-7066-5p	0.926016	0.32287	1.24831	0.258645	0.795909	0.974159	1.47077	2.05531	0	0	0.676345	0.859488	0.941252	2.16583	1.222	0.795177	0
chr8:84208563-84208583	MIMAT0000532	mmu-miR-23a-3p	512.269	0.0641659	0.241683	0.265497	0.790627	0.974159	614.781	600.15	386.488	259.517	637.793	580.154	497.922	585.496	491.245	399.179	582.236
chr8:84867987-84868007	MIMAT0028045	mmu-miR-7069-3p	1.22597	0.264571	1.10233	0.24001	0.810322	0.974159	0	2.05531	0	1.17962	2.02903	1.71898	0	2.16583	1.222	0.795177	2.31967
chr8:123104980-123105001	MIMAT0028064	mmu-miR-7079-5p	0.774825	0.430823	1.59568	0.269994	0.787165	0.974159	0	0	2.13529	1.17962	0	0	1.8825	2.16583	0	0	1.15983
chr9:41531471-41531492	MIMAT0017051	mmu-miR-100-3p	8.69102	-0.107966	0.400863	-0.269335	0.787672	0.974159	10.2954	9.24889	9.60881	7.07773	8.79248	7.73539	7.53002	7.94138	9.77603	7.15659	10.4385
chr9:41536732-41536753	MIMAT0000521_1	mmu-let-7a-5p	7671.95	-0.0313769	0.137305	-0.22852	0.819242	0.974159	9179.06	8858.38	6857.49	6202.45	7719.12	7739.69	7232.58	7368.15	7409.01	8190.32	7635.18
chr9:41536777-41536797	MIMAT0017015	mmu-let-7a-2-3p	8.4814	-0.123945	0.436918	-0.28368	0.776656	0.974159	13.2369	6.16593	5.33823	12.9758	7.43979	7.73539	12.2363	7.94138	6.11002	7.15659	6.959
chr9:74966781-74966802	MIMAT0049877	mmu-miR-1970c-3p	2.04333	-0.265361	0.972236	-0.272939	0.7849	0.974159	5.88307	1.02765	2.13529	1.17962	1.35269	0.859488	2.82376	0	2.44401	4.77106	0
chr9:106178846-106178867	MIMAT0000121	mmu-let-7g-5p	26546.6	0.0341015	0.161236	0.2115	0.832497	0.974159	32859.9	27235.9	23153	18981.3	28794.7	29450.4	23722.4	27462.7	25315	28209.7	26828.1
chr9:112118644-112118664	MIMAT0000140_1	mmu-miR-128-3p	24581.4	0.0465623	0.202613	0.229809	0.81824	0.974159	26050.2	26571	25349.1	13444.1	29331.1	27522.5	24180.8	26945.8	25871	19900.1	25229.9
chrX:103573112-103573133	MIMAT0003727	mmu-miR-374b-5p	44.9646	0.0617704	0.242951	0.25425	0.799302	0.974159	51.4769	43.1615	52.3146	36.5683	36.5226	47.2718	39.5326	31.7655	41.5481	56.4576	57.9917
chrX:103573113-103573131	MIMAT0014954	mmu-miR-374c-3p	44.9646	0.0617704	0.242951	0.25425	0.799302	0.974159	51.4769	43.1615	52.3146	36.5683	36.5226	47.2718	39.5326	31.7655	41.5481	56.4576	57.9917
chrX:147009493-147009514	MIMAT0014958	mmu-miR-1912-3p	3.55372	-0.202039	0.789482	-0.255914	0.798017	0.974159	2.94154	2.05531	5.33823	8.25735	0.676345	0.859488	0.941252	4.33166	8.55402	3.97588	1.15983
chr7:19181486-19181507	MIMAT0004642	mmu-miR-330-5p	2305.52	0.0312409	0.151894	0.205675	0.837045	0.976372	2181.15	1721.32	2559.15	2619.94	2310.39	2376.48	2087.7	2737.61	2462.34	2090.52	2214.12
chr10:93963817-93963838	MIMAT0004643	mmu-miR-331-5p	14.9965	0.0665018	0.332867	0.199785	0.841649	0.97673	7.35384	14.3872	19.2176	15.3351	16.2323	19.7682	14.1188	15.1608	15.886	15.9035	11.5983
chr16:84714143-84714165	MIMAT0000165	mmu-miR-155-5p	12.604	0.0737155	0.367179	0.200762	0.840885	0.97673	11.7661	13.3595	13.8794	12.9758	10.1452	12.8923	16.0013	14.4389	4.88801	16.6987	11.5983
chr2:10468989-10469010	MIMAT0009418	mmu-miR-669l-5p	2.10152	0.180853	0.905378	0.199754	0.841673	0.97673	2.94154	0	2.13529	3.53886	1.35269	2.57846	0.941252	1.44389	0	2.38553	5.79917
chr2:14261013-14261033	MIMAT0004940	mmu-miR-511-5p	1.43225	-0.222065	1.09351	-0.203075	0.839076	0.97673	1.47077	1.02765	3.20294	2.35924	0	3.43795	0	1.44389	1.222	1.59035	0
chr11:75173686-75173707	MIMAT0016984	mmu-miR-132-5p	2085.09	-0.0468983	0.239712	-0.195644	0.844888	0.979028	2245.86	2425.27	1582.25	1423.8	2931.96	2355.86	2815.29	1835.9	1806.12	1377.25	2136.41
chr2:25059851-25059873	MIMAT0029835	mmu-miR-7664-3p	1.5334	-0.190397	0.983041	-0.193682	0.846425	0.979028	1.47077	4.11062	1.06765	0	1.35269	0.859488	0.941252	1.44389	3.66601	0.795177	1.15983
chr4:135416601-135416622	MIMAT0017256	mmu-miR-700-5p	38.704	-0.0626509	0.324495	-0.193072	0.846903	0.979028	20.5907	43.1615	48.044	58.9811	27.7301	36.958	27.2963	31.7655	29.3281	63.6141	38.2745
chr1:128202404-128202424	MIMAT0000140	mmu-miR-128-3p	79103.8	0.0386428	0.203284	0.190093	0.849236	0.979221	85704.6	85786.6	80978.8	43177.7	94099.2	88315.8	78043	86086	83429.8	63776.4	80744.1
chr12:112733369-112733391	MIMAT0027781	mmu-miR-6940-3p	2.71956	-0.147022	0.772369	-0.190352	0.849033	0.979221	1.47077	6.16593	2.13529	1.17962	3.38172	4.29744	0.941252	2.88777	0	3.97588	3.4795
chr1:20682834-20682855	MIMAT0000769	mmu-miR-133b-3p	29.6624	-0.0566043	0.303199	-0.18669	0.851903	0.979287	38.24	28.7743	27.7588	34.209	24.3484	37.8175	30.1201	44.0385	17.108	20.6746	23.1967
chr1:23291754-23291775	MIMAT0005438	mmu-miR-30c-2-3p	252.033	0.0236125	0.169451	0.139347	0.889176	0.979287	238.264	316.518	246.626	196.997	249.571	269.02	231.548	208.642	266.397	300.577	248.204
chr1:159340362-159340382	MIMAT0019345	mmu-miR-1843b-5p	4164.2	0.0348786	0.201908	0.172744	0.862852	0.979287	4646.16	3031.58	4362.4	3603.74	4902.15	4376.51	3837.49	5077.43	4520.19	2665.43	4783.15
chr11:75463772-75463793	MIMAT0000531	mmu-miR-22-3p	129683	0.0221729	0.158234	0.140127	0.88856	0.979287	138371	110461	140062	100275	153815	127097	146092	143342	130229	105162	131612
chr11:79712009-79712030	MIMAT0000223	mmu-miR-193a-3p	9.87549	0.118901	0.850378	0.139822	0.888801	0.979287	0	1.02765	14.947	25.9517	5.41076	6.01642	27.2963	8.66332	0	13.518	5.79917
chr11:120624827-120624847	MIMAT0027773	mmu-miR-6936-3p	0.866971	0.184898	1.32929	0.139096	0.889374	0.979287	0	0	2.13529	1.17962	0.676345	1.71898	1.8825	0.721943	1.222	0	0
chr12:80391654-80391674	MIMAT0014805	mmu-miR-1843a-5p	1876.58	-0.0301329	0.192311	-0.156688	0.875491	0.979287	2167.91	1372.95	2012.51	1666.8	2269.14	1931.27	1652.84	2251.02	1968.65	1303.29	2045.95
chr12:109611521-109611541	MIMAT0017037	mmu-miR-341-5p	16.3714	-0.0712145	0.40092	-0.177628	0.859015	0.979287	19.12	7.19358	16.0147	24.772	17.585	13.7518	18.825	22.3802	4.88801	13.518	22.0368
chr12:109611556-109611576	MIMAT0000588	mmu-miR-341-3p	6227.9	-0.0396916	0.233987	-0.169632	0.8653	0.979287	5353.59	3480.67	7468.18	9490.05	5815.21	6261.37	5500.68	7242.54	6543.83	5206.02	6144.8
chr12:109739132-109739152	MIMAT0017244	mmu-miR-496a-5p	2.4849	0.144989	0.81246	0.178456	0.858365	0.979287	4.4123	3.08296	1.06765	0	3.38172	1.71898	3.76501	3.60972	0	3.97588	2.31967
chr12:109743466-109743486	MIMAT0003186	mmu-miR-369-3p	1221.54	0.0597808	0.390894	0.152934	0.878451	0.979287	1028.07	266.163	1249.14	2497.26	929.974	1104.44	1769.55	1314.66	936.054	1145.85	1195.79
chr13:24980094-24980114	MIMAT0049834	mmu-miR-12184-3p	2.43206	-0.124829	0.783225	-0.159378	0.873371	0.979287	0	3.08296	1.06765	5.89811	2.70538	2.57846	3.76501	2.88777	1.222	2.38553	1.15983
chr13:58023170-58023191	MIMAT0017268	mmu-miR-874-5p	71.4244	0.0364168	0.237303	0.153461	0.878035	0.979287	54.4184	49.3274	89.6822	84.9327	74.3979	85.0893	72.4764	93.8526	57.4341	68.3852	55.672
chr13:109324753-109324774	MIMAT0005291	mmu-miR-582-5p	143.083	0.0501311	0.299609	0.167321	0.867117	0.979287	197.083	75.0188	117.441	143.914	169.086	194.244	183.544	151.608	86.7622	85.8791	169.336
chr14:63150292-63150313	MIMAT0049838	mmu-miR-12185-3p	3.68799	-0.0992528	0.636677	-0.155892	0.876118	0.979287	2.94154	6.16593	4.27058	0	5.41076	4.29744	2.82376	4.33166	3.66601	3.18071	3.4795
chr15:76248235-76248258	MIMAT0027807	mmu-miR-6953-3p	10.7573	-0.0582927	0.382433	-0.152426	0.878851	0.979287	10.2954	12.3319	6.40587	12.9758	12.8506	10.3139	6.58877	11.5511	12.22	13.518	9.27867
chr16:13453895-13453916	MIMAT0000711_1	mmu-miR-365-3p	10.5208	-0.0654453	0.415895	-0.15736	0.874961	0.979287	16.1784	11.3042	5.33823	9.43697	11.4979	12.8923	11.295	5.77555	9.77603	7.15659	15.0778
chr16:77599717-77599738	MIMAT0004622	mmu-let-7c-1-3p	11.7805	0.0621639	0.411005	0.151249	0.87978	0.979287	17.6492	6.16593	13.8794	14.1555	6.76345	12.8923	11.295	16.6047	12.22	6.36141	11.5983
chr18:61397875-61397896	MIMAT0000742	mmu-miR-378a-5p	43.3106	-0.0580806	0.404778	-0.143488	0.885905	0.979287	26.4738	48.2998	44.8411	77.855	24.3484	25.7846	75.3002	27.4339	19.5521	63.6141	42.9138
chr19:46342828-46342849	MIMAT0004826	mmu-miR-146b-3p	2.35376	-0.128686	0.830917	-0.154872	0.876922	0.979287	1.47077	2.05531	2.13529	2.35924	4.05807	0	4.70626	3.60972	1.222	0.795177	3.4795
chr2:10514355-10514377	MIMAT0017347	mmu-miR-669o-3p	13.9035	0.0897517	0.517981	0.173272	0.862437	0.979287	8.82461	2.05531	16.0147	30.6702	10.1452	8.59488	14.1188	19.4925	6.11002	20.6746	16.2377
chr6:47803590-47803610	MIMAT0003494	mmu-miR-704	1.40936	-0.157558	1.00896	-0.156159	0.875908	0.979287	0	4.11062	1.06765	0	2.02903	1.71898	1.8825	0.721943	1.222	1.59035	1.15983
chr7:27205615-27205635	MIMAT0005849	mmu-miR-1191a	2.17784	0.14535	0.795022	0.182825	0.854936	0.979287	2.94154	2.05531	1.06765	2.35924	2.02903	1.71898	0.941252	2.16583	1.222	3.97588	3.4795
chr7:47083166-47083187	MIMAT0028017	mmu-miR-7056-3p	0.794714	-0.275134	1.57816	-0.174339	0.861599	0.979287	0	0	2.13529	2.35924	0	0.859488	0	2.16583	1.222	0	0
chr7:141221407-141221428	MIMAT0000658	mmu-miR-210-3p	163.088	0.0279275	0.179724	0.155391	0.876513	0.979287	135.311	182.923	169.756	159.249	158.941	169.319	155.307	208.642	182.078	121.662	150.778
chr8:13189068-13189091	MIMAT0009441	mmu-miR-1968-5p	4.42748	-0.0928786	0.583835	-0.159084	0.873603	0.979287	5.88307	7.19358	4.27058	2.35924	3.38172	3.43795	1.8825	3.60972	4.88801	7.15659	4.63933
chr8:16168805-16168825	MIMAT0014817	mmu-miR-3106-5p	2.56968	0.128523	0.791925	0.162291	0.871077	0.979287	2.94154	1.02765	1.06765	4.71849	2.70538	1.71898	5.64751	3.60972	2.44401	2.38553	0
chr8:40307875-40307893	MIMAT0029839	mmu-miR-7666-3p	1.53269	0.189923	1.02209	0.185817	0.852588	0.979287	1.47077	2.05531	0	2.35924	1.35269	0	2.82376	2.88777	0	1.59035	2.31967
chr8:94324312-94324334	MIMAT0000150	mmu-miR-138-5p	3404.33	-0.0521901	0.292336	-0.178528	0.858308	0.979287	2629.73	2120.05	3700.46	6092.74	2815.62	2767.55	5598.57	3212.65	2747.06	2981.91	2781.28
chr9:21809941-21809960	MIMAT0028073	mmu-miR-7083-3p	0.740538	0.207688	1.4271	0.145532	0.884291	0.979287	1.47077	0	2.13529	0	0	0.859488	0.941252	0.721943	1.222	0.795177	0
chr9:74966743-74966765	MIMAT0049876	mmu-miR-1970c-5p	0.809104	-0.193209	1.36452	-0.141595	0.8874	0.979287	1.47077	0	0	2.35924	0.676345	0.859488	0	0.721943	1.222	1.59035	0
chr9:122682898-122682920	MIMAT0000150_1	mmu-miR-138-5p	10516.6	-0.0464445	0.287179	-0.161727	0.871521	0.979287	8065.69	6685.92	11544.4	18235.8	8976.45	8895.7	17397.2	10236.4	8319.4	8859.06	8466.78
chrX:20863126-20863146	MIMAT0022362	mmu-miR-5617-3p	4.93975	-0.0913476	0.618553	-0.14768	0.882596	0.979287	2.94154	10.2765	1.06765	4.71849	6.0871	6.8759	1.8825	2.88777	8.55402	5.56624	3.4795
chrX:52741854-52741874	MIMAT0000539_1	mmu-miR-92a-3p	111.966	0.0453619	0.283569	0.159968	0.872907	0.979287	76.4799	190.116	99.291	80.2142	102.804	77.3539	96.0077	96.0185	158.86	143.132	111.344
chrX:59097669-59097690	MIMAT0017277	mmu-miR-504-3p	0.755984	0.215247	1.54671	0.139164	0.88932	0.979287	0	2.05531	0	0	1.35269	0.859488	1.8825	2.16583	0	0	0
chrX:105379142-105379164	MIMAT0000558	mmu-miR-325-5p	45.9561	0.03763	0.246212	0.152836	0.878528	0.979287	44.123	60.6316	32.0294	36.5683	52.7549	46.4123	35.7676	52.7019	52.5461	54.8672	37.1147
chrX:113074867-113074888	MIMAT0000704	mmu-miR-361-5p	1008.65	-0.0356012	0.192774	-0.184679	0.853481	0.979287	1126.61	1339.03	921.378	717.21	1007.08	995.287	756.767	958.741	1103.47	1230.14	939.465
chr4:143136136-143136157	MIMAT0027946	mmu-miR-7021-5p	1.23477	-0.158635	1.16319	-0.13638	0.891521	0.980456	1.47077	3.08296	1.06765	1.17962	0	1.71898	0	0.721943	0	3.18071	1.15983
chr1:92464483-92464503	MIMAT0027701	mmu-miR-6900-3p	0.886795	-0.129432	1.29498	-0.0999495	0.920384	0.983057	0	1.02765	1.06765	1.17962	1.35269	0.859488	2.82376	1.44389	0	0	0
chr10:95559244-95559264	MIMAT0014814	mmu-miR-3058-3p	1.13469	0.105488	1.13595	0.0928629	0.926012	0.983057	0	1.02765	2.13529	0	2.02903	0.859488	1.8825	2.16583	1.222	0	1.15983
chr11:52126804-52126825	MIMAT0014829	mmu-miR-3061-3p	93.0279	-0.0241998	0.24479	-0.0988594	0.92125	0.983057	82.363	124.346	103.562	50.7237	106.862	101.42	74.3589	80.8577	120.978	97.8067	80.0285
chr11:75173403-75173425	MIMAT0017053	mmu-miR-212-5p	1702.85	0.0253454	0.271295	0.0934236	0.925567	0.983057	1767.86	1915.55	1458.4	854.046	2434.84	2157.31	1486.24	1416.45	1941.76	1102.12	2196.72
chr11:78178866-78178887	MIMAT0029813	mmu-miR-7653-3p	1.7882	0.106438	0.904055	0.117734	0.906279	0.983057	1.47077	0	1.06765	2.35924	3.38172	2.57846	0.941252	0.721943	2.44401	2.38553	2.31967
chr11:115795866-115795886	MIMAT0022370	mmu-miR-5621-3p	4.22484	0.0747645	0.656003	0.11397	0.909262	0.983057	0	2.05531	6.40587	7.07773	4.73441	3.43795	3.76501	7.94138	3.66601	1.59035	5.79917
chr11:120014816-120014837	MIMAT0004647	mmu-miR-338-5p	462.35	-0.0227302	0.241859	-0.0939809	0.925124	0.983057	582.424	486.081	453.749	416.406	392.956	492.487	273.904	441.829	752.754	389.637	403.622
chr11:120014819-120014841	MIMAT0014837	mmu-miR-3065-3p	462.461	-0.0220941	0.242125	-0.0912507	0.927293	0.983057	582.424	486.081	453.749	416.406	392.956	492.487	273.904	441.829	753.976	389.637	403.622
chr12:17355404-17355425	MIMAT0014838	mmu-miR-3066-5p	6.20045	-0.0483764	0.505054	-0.0957846	0.923692	0.983057	8.82461	5.13827	5.33823	7.07773	5.41076	3.43795	8.47127	3.60972	3.66601	7.95177	9.27867
chr12:109572004-109572025	MIMAT0003739	mmu-miR-673-5p	716.661	-0.0287651	0.220081	-0.130702	0.896011	0.983057	673.612	996.825	770.84	496.621	683.785	709.078	492.275	798.469	940.942	733.948	586.876
chr14:115043721-115043742	MIMAT0000650	mmu-miR-17-3p	12.6825	-0.0406444	0.393991	-0.103161	0.917835	0.983057	5.88307	16.4425	16.0147	14.1555	11.4979	8.59488	22.5901	10.1072	12.22	12.7228	9.27867
chr15:82198167-82198188	MIMAT0004666	mmu-miR-33-3p	12.3018	0.0485335	0.4756	0.102047	0.918719	0.983057	22.0615	4.11062	11.7441	12.9758	10.1452	6.01642	20.7075	7.21943	15.886	17.4939	6.959
chr15:101369401-101369421	MIMAT0009406	mmu-miR-1941-3p	1.67399	0.104633	1.09732	0.0953529	0.924035	0.983057	2.94154	1.02765	4.27058	0	0	0.859488	0.941252	3.60972	2.44401	0	2.31967
chr16:33105375-33105396	MIMAT0009413	mmu-miR-1947-5p	40.5445	-0.0324314	0.293992	-0.110314	0.912161	0.983057	29.4154	63.7146	44.8411	22.4128	43.9624	43.8339	34.8263	35.3752	48.8801	50.8913	27.836
chr18:10782913-10782934	MIMAT0000145	mmu-miR-133a-3p	88.0692	0.0222551	0.225895	0.09852	0.921519	0.983057	95.5999	76.0465	95.0204	66.0588	104.157	102.279	110.127	106.848	62.3222	66.7949	83.508
chr2:10503574-10503595	MIMAT0004875_7	mmu-miR-466b-5p	0.827567	0.168057	1.33093	0.12627	0.899518	0.983057	0	1.02765	2.13529	0	0.676345	1.71898	0.941252	1.44389	0	0	1.15983
chr2:10503615-10503636	MIMAT0004876_7	mmu-miR-466b-3p	8.93457	0.0539711	0.465749	0.11588	0.907747	0.983057	13.2369	2.05531	11.7441	12.9758	4.73441	8.59488	7.53002	10.8292	8.55402	8.74694	9.27867
chr2:38852785-38852806	MIMAT0005443	mmu-miR-181a-2-3p	817.563	-0.0322555	0.249621	-0.129218	0.897185	0.983057	539.772	1231.13	890.416	750.239	725.042	563.824	632.521	701.007	945.83	1145.85	867.555
chr2:84741155-84741176	MIMAT0016983	mmu-miR-130a-5p	1.88886	0.107579	0.853799	0.126001	0.899731	0.983057	1.47077	2.05531	0	3.53886	2.02903	1.71898	1.8825	2.88777	2.44401	1.59035	1.15983
chr4:88910577-88910599	MIMAT0004634	mmu-miR-31-3p	6.20236	-0.0528641	0.570876	-0.0926017	0.92622	0.983057	8.82461	3.08296	4.27058	8.25735	7.43979	10.3139	12.2363	4.33166	2.44401	2.38553	4.63933
chr4:94665206-94665227	MIMAT0004935	mmu-miR-872-3p	543.774	-0.0384918	0.333303	-0.115486	0.90806	0.983057	432.406	400.785	383.285	1115.92	426.774	423.728	939.37	440.385	349.493	574.118	495.249
chr5:114851973-114851998	MIMAT0024861	mmu-miR-6240	228.793	0.0629134	0.692356	0.0908686	0.927597	0.983057	470.646	328.85	172.959	92.0105	52.7549	479.594	240.961	80.1357	211.407	42.9395	344.471
chr6:51269867-51269888	MIMAT0004617	mmu-miR-148a-5p	143.685	0.0251697	0.208126	0.120935	0.903742	0.983057	126.486	144.899	160.147	152.171	126.477	137.518	124.245	146.555	185.744	93.0357	183.254
chr6:99184962-99184982	MIMAT0049870	mmu-miR-12201-3p	1.56291	0.128683	1.17256	0.109745	0.912612	0.983057	1.47077	3.08296	0	2.35924	0.676345	0.859488	0	0	1.222	6.36141	1.15983
chr7:99552328-99552348	MIMAT0000559	mmu-miR-326-3p	454.091	-0.0423119	0.329287	-0.128496	0.897757	0.983057	314.744	205.531	498.59	909.488	378.753	344.655	657.935	470.707	388.597	371.348	454.655
chr7:142654932-142654952	MIMAT0003120	mmu-miR-483-3p	3.75318	-0.0774707	0.71583	-0.108225	0.913817	0.983057	0	7.19358	6.40587	3.53886	2.02903	0.859488	5.64751	2.16583	2.44401	6.36141	4.63933
chr9:44400465-44400486	MIMAT0028077	mmu-miR-7085-3p	0.817007	-0.124407	1.36593	-0.0910789	0.92743	0.983057	1.47077	1.02765	0	1.17962	0.676345	0	1.8825	0	0	1.59035	1.15983
chr9:119031850-119031871	MIMAT0017020	mmu-miR-26a-1-3p	1.68348	0.119098	0.964465	0.123486	0.901722	0.983057	0	1.02765	1.06765	1.17962	4.05807	0.859488	0.941252	1.44389	3.66601	0.795177	3.4795
chrX:7248031-7248051	MIMAT0000217	mmu-miR-188-5p	23.2672	0.0593697	0.484452	0.12255	0.902463	0.983057	13.2369	4.11062	14.947	61.3403	20.2903	18.0492	27.2963	23.1022	18.33	26.2408	28.9958
chrX:53048339-53048360	MIMAT0001546_1	mmu-miR-450a-5p	3.07941	-0.0690623	0.728201	-0.0948395	0.924442	0.983057	2.94154	3.08296	7.47352	1.17962	1.35269	1.71898	2.82376	5.0536	1.222	2.38553	4.63933
chrX:103572966-103572986	MIMAT0017273	mmu-miR-421-5p	3.21386	0.098873	0.808247	0.12233	0.902638	0.983057	0	3.08296	4.27058	5.89811	2.02903	4.29744	2.82376	3.60972	1.222	0	8.11883
chr11:70012095-70012114	MIMAT0000556	mmu-miR-324-3p	106.394	0.0195582	0.222709	0.0878197	0.93002	0.98425	70.5969	84.2677	130.253	143.914	98.7464	84.2298	122.363	125.618	109.98	101.783	98.5858
chr16:18327438-18327459	MIMAT0000214	mmu-miR-185-5p	252.378	0.0153747	0.177306	0.0867126	0.9309	0.98425	280.917	217.863	217.8	264.235	275.272	297.383	300.259	284.446	191.854	223.445	222.688
chr12:109544588-109544609	MIMAT0007872	mmu-miR-1906	1.73606	0.0878817	1.11429	0.0788676	0.937138	0.988275	4.4123	3.08296	0	1.17962	0	4.29744	0.941252	0.721943	3.66601	0.795177	0
chr8:71631083-71631102	MIMAT0028040	mmu-miR-6769b-5p	2.6745	0.0632598	0.813103	0.0778005	0.937987	0.988275	1.47077	4.11062	5.33823	0	2.02903	0.859488	1.8825	1.44389	2.44401	6.36141	3.4795
chr8:105615521-105615543	MIMAT0022952	mmu-miR-1966-3p	4.82075	-0.0532849	0.674322	-0.07902	0.937017	0.988275	2.94154	8.22124	4.27058	1.17962	7.43979	2.57846	5.64751	5.77555	10.998	3.97588	0
chr19:4623929-4623950	MIMAT0027874	mmu-miR-6986-5p	1.79765	0.0654184	0.85969	0.0760954	0.939343	0.988446	1.47077	1.02765	2.13529	1.17962	2.70538	2.57846	0.941252	1.44389	1.222	1.59035	3.4795
chr9:89802263-89802284	MIMAT0000213	mmu-miR-184-3p	815.859	0.0379371	0.506856	0.0748479	0.940336	0.988446	1182.5	1165.36	145.2	184.021	1343.22	1120.77	804.771	600.657	674.546	382.48	1370.92
chr14:54949072-54949093	MIMAT0000520	mmu-miR-208a-3p	0.808739	-0.112092	1.58232	-0.0708406	0.943525	0.990646	0	2.05531	2.13529	0	0	0	2.82376	0.721943	0	0	1.15983
chr12:109715367-109715388	MIMAT0003182	mmu-miR-494-3p	4.85471	0.0512471	0.771571	0.0664192	0.947044	0.99289	2.94154	6.16593	2.13529	10.6166	2.02903	7.73539	13.1775	0.721943	2.44401	0.795177	4.63933
chr7:126579506-126579527	MIMAT0028022	mmu-miR-7059-5p	2.53258	0.0540598	0.826653	0.065396	0.947859	0.99289	2.94154	3.08296	3.20294	2.35924	0.676345	0.859488	0.941252	0.721943	4.88801	2.38553	5.79917
chr10:81104652-81104673	MIMAT0022355	mmu-miR-5615-5p	4.86659	-0.030924	0.552537	-0.0559673	0.955368	0.993291	7.35384	4.11062	2.13529	3.53886	7.43979	4.29744	6.58877	5.0536	2.44401	4.77106	5.79917
chr10:81104654-81104675	MIMAT0022356_1	mmu-miR-5615-3p	4.86659	-0.030924	0.552537	-0.0559673	0.955368	0.993291	7.35384	4.11062	2.13529	3.53886	7.43979	4.29744	6.58877	5.0536	2.44401	4.77106	5.79917
chr10:81386390-81386412	MIMAT0027727	mmu-miR-6913-3p	7.62571	-0.0240528	0.508692	-0.0472835	0.962287	0.993291	8.82461	10.2765	6.40587	3.53886	9.46883	1.71898	10.3538	8.66332	6.11002	12.7228	5.79917
chr11:75463734-75463755	MIMAT0004629	mmu-miR-22-5p	106.117	-0.0099271	0.194065	-0.0511535	0.959203	0.993291	127.957	98.6549	85.4116	84.9327	134.593	98.8411	114.833	111.179	119.756	89.0598	102.065
chr11:100478411-100478432	MIMAT0028130	mmu-miR-7116-3p	3.90216	0.0248383	0.589366	0.0421441	0.966384	0.993291	4.4123	3.08296	3.20294	4.71849	4.05807	2.57846	3.76501	4.33166	4.88801	5.56624	2.31967
chr11:106782736-106782757	MIMAT0014834	mmu-miR-3064-5p	1.55763	-0.0432883	0.94428	-0.0458427	0.963436	0.993291	1.47077	3.08296	0	1.17962	2.02903	1.71898	0.941252	0.721943	2.44401	2.38553	1.15983
chr14:61632038-61632059	MIMAT0004624	mmu-miR-15a-3p	4.60364	0.0258547	0.624437	0.0414049	0.966973	0.993291	7.35384	1.02765	7.47352	4.71849	2.70538	3.43795	7.53002	6.49749	3.66601	1.59035	4.63933
chr15:68337431-68337452	MIMAT0004524	mmu-miR-30b-3p	35.2893	-0.0120034	0.278827	-0.0430494	0.965662	0.993291	41.1815	34.9403	28.8264	22.4128	48.6968	41.2554	22.5901	31.7655	37.8821	33.3974	45.2335
chr15:85707379-85707400	MIMAT0004621	mmu-let-7b-3p	560.126	0.0106827	0.223413	0.047816	0.961863	0.993291	451.526	790.267	434.532	528.47	584.362	458.107	501.687	602.823	565.787	815.851	427.979
chr17:34845104-34845124	MIMAT0027843	mmu-miR-6970-3p	1.28526	0.0624911	1.04375	0.0598715	0.952258	0.993291	1.47077	2.05531	0	2.35924	0.676345	1.71898	0.941252	2.16583	0	1.59035	1.15983
chr2:37688212-37688234	MIMAT0020639	mmu-miR-5128	1.08657	0.0520869	1.17997	0.0441427	0.964791	0.993291	1.47077	2.05531	0	1.17962	0.676345	1.71898	0.941252	0	0	1.59035	2.31967
chr2:94261358-94261379	MIMAT0003736	mmu-miR-670-5p	1.28433	-0.0678753	1.12516	-0.0603251	0.951897	0.993291	0	3.08296	2.13529	0	1.35269	2.57846	0	2.16583	1.222	1.59035	0
chr4:88122091-88122112	MIMAT0017255	mmu-miR-491-3p	2.86117	0.0282814	0.716591	0.0394666	0.968518	0.993291	2.94154	2.05531	1.06765	4.71849	3.38172	1.71898	1.8825	2.88777	4.88801	4.77106	1.15983
chr5:36301606-36301628	MIMAT0029909	mmu-miR-7689-3p	53.3065	0.0143545	0.356337	0.0402836	0.967867	0.993291	55.8892	55.4934	40.5705	33.0294	79.1324	68.759	48.0039	66.4188	50.1021	15.9035	73.0695
chr5:137296624-137296646	MIMAT0027977	mmu-miR-7036a-3p	0.99356	-0.069342	1.21793	-0.0569341	0.954598	0.993291	0	2.05531	2.13529	0	0.676345	0	0.941252	0.721943	2.44401	0.795177	1.15983
chr7:25097089-25097111	MIMAT0025582	mmu-miR-6537-3p	1.63702	-0.0613771	1.02299	-0.0599979	0.952157	0.993291	0	1.02765	2.13529	4.71849	0.676345	2.57846	0	2.16583	0	2.38553	2.31967
chr7:25217668-25217688	MIMAT0028001	mmu-miR-7048-3p	2.40249	0.0433503	0.838325	0.0517106	0.958759	0.993291	2.94154	1.02765	0	4.71849	3.38172	3.43795	3.76501	3.60972	0	2.38553	1.15983
chrX:151912353-151912374	MIMAT0000525_1	mmu-let-7f-5p	58960.7	0.0057185	0.124964	0.0457612	0.963501	0.993291	70946.9	59724.2	55858.1	48454.1	59184.9	58807.9	54806.3	58987.1	58870	63466.2	59462.3
chrX:151913287-151913308	MIMAT0017023	mmu-miR-98-3p	113.018	0.015696	0.405432	0.0387143	0.969118	0.993291	136.781	47.2721	213.529	47.1849	117.008	97.9816	44.2389	141.501	158.86	136.77	102.065
chr11:101419187-101419209	MIMAT0027759	mmu-miR-6929-3p	1.41872	-0.0300318	1.09145	-0.0275154	0.978049	0.994031	2.94154	0	1.06765	1.17962	2.02903	0.859488	3.76501	1.44389	0	0	2.31967
chr11:120624856-120624876	MIMAT0027772	mmu-miR-6936-5p	0.840184	0.0420417	1.53384	0.0274094	0.978133	0.994031	0	2.05531	2.13529	0	0	0	0	1.44389	1.222	2.38553	0
chr12:26414970-26414988	MIMAT0025583	mmu-miR-6538	2.15696	-0.0277911	0.933048	-0.0297852	0.976238	0.994031	4.4123	5.13827	0	0	1.35269	3.43795	1.8825	0.721943	3.66601	0.795177	2.31967
chr12:109594528-109594549	MIMAT0001421	mmu-miR-434-5p	7180.49	0.00360555	0.154438	0.0233463	0.981374	0.994031	7734.77	5473.29	7422.27	6851.24	8371.12	7797.27	6745.95	7877.12	7200.04	5707.78	7804.52
chr13:21896930-21896950	MIMAT0009455	mmu-miR-1983	171.367	-0.00578874	0.16269	-0.0355813	0.971616	0.994031	166.197	168.535	210.326	145.093	168.41	168.46	135.54	189.149	186.966	180.505	165.856
chr13:48537889-48537910	MIMAT0000525	mmu-let-7f-5p	10961.4	0.00377451	0.125036	0.0301874	0.975918	0.994031	13213.4	11064.8	10355.1	9038.26	11058.9	10951.6	10225.8	10947.6	10885.6	11815.5	11018.4
chr16:17124071-17124092	MIMAT0000387	mmu-miR-130b-3p	151.995	0.0058611	0.248039	0.0236298	0.981148	0.994031	117.661	194.227	156.944	146.273	143.385	131.502	153.424	116.955	118.534	260.818	132.221
chr18:12714862-12714883	MIMAT0009415	mmu-miR-1948-3p	7.52616	-0.0157772	0.572822	-0.0275429	0.978027	0.994031	1.47077	12.3319	6.40587	15.3351	2.70538	4.29744	6.58877	9.38526	6.11002	13.518	4.63933
chr19:44303171-44303192	MIMAT0020622	mmu-miR-5114	2.41118	-0.0196522	0.867951	-0.022642	0.981936	0.994031	1.47077	7.19358	0	1.17962	2.02903	1.71898	4.70626	1.44389	3.66601	0.795177	2.31967
chr4:120769546-120769567	MIMAT0004616	mmu-miR-30c-1-3p	186.505	-0.00552728	0.215559	-0.0256417	0.979543	0.994031	189.729	238.416	209.258	115.603	181.26	201.12	131.775	194.203	217.517	209.132	163.537
chr8:84208685-84208706	MIMAT0004633	mmu-miR-27a-5p	6.44383	-0.0181131	0.533346	-0.0339612	0.972908	0.994031	5.88307	8.22124	6.40587	2.35924	9.46883	12.8923	6.58877	7.94138	3.66601	3.97588	3.4795
chr10:126710355-126710376	MIMAT0025167	mmu-miR-378d	12.2715	-0.00702395	0.375199	-0.0187206	0.985064	0.994088	11.7661	12.3319	18.15	4.71849	14.2032	12.0328	11.295	10.8292	10.998	15.9035	12.7582
chr11:87113054-87113076	MIMAT0000379	mmu-miR-301a-3p	2367.3	0.00461456	0.22981	0.0200799	0.98398	0.994088	2112.02	1399.67	2593.31	3594.31	2117.64	2262.17	2244.89	2282.06	2241.15	3140.15	2052.91
chr15:103285185-103285206	MIMAT0000580	mmu-miR-148b-3p	3130.64	0.00463271	0.25128	0.0184365	0.985291	0.994088	4907.95	2388.27	2895.45	1693.94	3740.86	3700.1	2508.44	3357.76	3226.09	2737	3281.17
chr19:22750649-22750669	MIMAT0017002	mmu-miR-204-3p	5.08012	-0.0129426	0.779255	-0.016609	0.986749	0.994449	1.47077	8.22124	4.27058	11.7962	0	2.57846	9.41252	1.44389	3.66601	9.54212	3.4795
chr16:17124109-17124130	MIMAT0004583	mmu-miR-130b-5p	84.8652	-0.00390473	0.287173	-0.0135971	0.989151	0.994653	95.5999	109.959	88.6146	58.9811	73.0453	83.3703	88.4777	67.8627	56.2121	151.084	60.3113
chrX:147010655-147010676	MIMAT0014803	mmu-miR-1264-3p	27.0978	0.0085443	0.609497	0.0140186	0.988815	0.994653	10.2954	12.3319	40.5705	53.083	18.2613	18.0492	3.76501	25.99	84.3182	17.4939	13.918
chr4:135416561-135416581	MIMAT0003490	mmu-miR-700-3p	33.5444	-0.003902	0.334949	-0.0116495	0.990705	0.995108	19.12	31.8573	49.1117	51.9033	16.2323	24.9252	32.0026	31.0436	30.5501	38.1685	44.0737
chrX:100381114-100381135	MIMAT0003781	mmu-miR-676-5p	207.971	-0.00153821	0.211351	-0.007278	0.994193	0.997503	202.966	162.369	181.5	300.803	194.111	197.682	208.958	179.042	169.858	286.264	204.131
chr12:109742466-109742487	MIMAT0017209	mmu-miR-541-3p	3.33005	-0.00146972	0.758828	-0.00193683	0.998455	0.99956	4.4123	0	5.33823	1.17962	5.41076	3.43795	5.64751	2.16583	2.44401	0.795177	5.79917
chr2:10505731-10505752	MIMAT0005293	mmu-miR-467e-5p	15.8953	0.00127843	0.385194	0.00331891	0.997352	0.99956	19.12	5.13827	18.15	17.6943	18.9377	13.7518	17.8838	13.7169	13.442	10.3373	26.6762
chr9:51103574-51103595	MIMAT0004581	mmu-miR-34b-3p	14.3609	-3.01883e-05	0.394888	-7.64478e-05	0.999939	0.999939	7.35384	23.6361	10.6765	17.6943	11.4979	12.8923	12.2363	9.38526	17.108	11.1325	24.3565
chr1:12426016-12426038	MIMAT0025084	mmu-miR-6341	0	NA	NA	NA	NA	NA	0	0	0	0	0	0	0	0	0	0	0
chr1:20679017-20679039	MIMAT0017004	mmu-miR-206-5p	0	NA	NA	NA	NA	NA	0	0	0	0	0	0	0	0	0	0	0
chr1:20679055-20679076	MIMAT0000239	mmu-miR-206-3p	0.144578	0.788319	3.14975	0.25028	0.802371	NA	0	0	0	0	0	0	0	0	0	1.59035	0
chr1:20682797-20682818	MIMAT0017083	mmu-miR-133b-5p	0	NA	NA	NA	NA	NA	0	0	0	0	0	0	0	0	0	0	0
chr1:29421552-29421573	MIMAT0025085	mmu-miR-6342	0	NA	NA	NA	NA	NA	0	0	0	0	0	0	0	0	0	0	0
chr1:34117408-34117429	MIMAT0027693	mmu-miR-6896-3p	0.0781353	0.307426	3.14975	0.0976031	0.922247	NA	0	0	0	0	0	0.859488	0	0	0	0	0
chr1:36144290-36144312	MIMAT0027694	mmu-miR-6897-5p	0.342434	0.649619	2.03662	0.318968	0.749751	NA	0	1.02765	0	0	0	0	0	0.721943	1.222	0.795177	0
chr1:36144252-36144272	MIMAT0027695	mmu-miR-6897-3p	0.133706	-0.750537	3.14975	-0.238285	0.81166	NA	1.47077	0	0	0	0	0	0	0	0	0	0
chr1:36348732-36348753	MIMAT0027696	mmu-miR-6898-5p	0	NA	NA	NA	NA	NA	0	0	0	0	0	0	0	0	0	0	0
chr1:36348688-36348708	MIMAT0027697	mmu-miR-6898-3p	0	NA	NA	NA	NA	NA	0	0	0	0	0	0	0	0	0	0	0
chr1:39186908-39186929	MIMAT0025092	mmu-miR-6349	0	NA	NA	NA	NA	NA	0	0	0	0	0	0	0	0	0	0	0
chr1:47467097-47467117	MIMAT0025093	mmu-miR-6350	0	NA	NA	NA	NA	NA	0	0	0	0	0	0	0	0	0	0	0
chr1:53849424-53849443	MIMAT0029882	mmu-miR-7681-5p	0	NA	NA	NA	NA	NA	0	0	0	0	0	0	0	0	0	0	0
chr1:53849474-53849495	MIMAT0029883	mmu-miR-7681-3p	0	NA	NA	NA	NA	NA	0	0	0	0	0	0	0	0	0	0	0
chr1:64042476-64042496	MIMAT0027698	mmu-miR-6899-5p	0.0656312	0.307426	3.14975	0.0976031	0.922247	NA	0	0	0	0	0	0	0	0.721943	0	0	0
chr1:73855553-73855575	MIMAT0025094	mmu-miR-6351	0	NA	NA	NA	NA	NA	0	0	0	0	0	0	0	0	0	0	0
chr1:74206562-74206578	MIMAT0009391	mmu-miR-1928	0	NA	NA	NA	NA	NA	0	0	0	0	0	0	0	0	0	0	0
chr1:74900696-74900717	MIMAT0017078	mmu-miR-375-5p	0	NA	NA	NA	NA	NA	0	0	0	0	0	0	0	0	0	0	0
chr1:76509620-76509641	MIMAT0025086	mmu-miR-6343	0	NA	NA	NA	NA	NA	0	0	0	0	0	0	0	0	0	0	0
chr1:77496731-77496752	MIMAT0025095	mmu-miR-6352	0	NA	NA	NA	NA	NA	0	0	0	0	0	0	0	0	0	0	0
chr1:82131926-82131947	MIMAT0025087	mmu-miR-6344	0	NA	NA	NA	NA	NA	0	0	0	0	0	0	0	0	0	0	0
chr1:84218926-84218948	MIMAT0025096	mmu-miR-6353	0	NA	NA	NA	NA	NA	0	0	0	0	0	0	0	0	0	0	0
chr1:84695890-84695911	MIMAT0020637	mmu-miR-5126	0.0781353	0.307426	3.14975	0.0976031	0.922247	NA	0	0	0	0	0	0.859488	0	0	0	0	0
chr1:85751983-85752002	MIMAT0031398	mmu-miR-8096	0.157857	0.788319	3.14975	0.25028	0.802371	NA	0	0	0	0	0	0	0.941252	0	0	0.795177	0
chr1:92464514-92464537	MIMAT0027700	mmu-miR-6900-5p	0	NA	NA	NA	NA	NA	0	0	0	0	0	0	0	0	0	0	0
chr1:92850421-92850442	MIMAT0016990	mmu-miR-149-3p	0.501739	1.52969	1.89465	0.80737	0.419453	NA	0	0	0	0	0.676345	0	0	2.88777	0	0.795177	1.15983
chr1:93274585-93274604	MIMAT0027703	mmu-miR-6901-3p	0	NA	NA	NA	NA	NA	0	0	0	0	0	0	0	0	0	0	0
chr1:93346135-93346155	MIMAT0027705	mmu-miR-6902-3p	0	NA	NA	NA	NA	NA	0	0	0	0	0	0	0	0	0	0	0
chr1:93352191-93352211	MIMAT0025088	mmu-miR-6345	0	NA	NA	NA	NA	NA	0	0	0	0	0	0	0	0	0	0	0
chr1:106546536-106546555	MIMAT0031390	mmu-miR-3473f	0	NA	NA	NA	NA	NA	0	0	0	0	0	0	0	0	0	0	0
chr1:118954278-118954299	MIMAT0025089	mmu-miR-6346	0	NA	NA	NA	NA	NA	0	0	0	0	0	0	0	0	0	0	0
chr1:133726564-133726583	MIMAT0027707	mmu-miR-6903-3p	0.265095	0.211255	2.4386	0.0866296	0.930966	NA	0	0	0	1.17962	0	0	0.941252	0	0	0.795177	0
chr1:134946278-134946299	MIMAT0049821	mmu-miR-5104b-5p	0.0781353	0.307426	3.14975	0.0976031	0.922247	NA	0	0	0	0	0	0.859488	0	0	0	0	0
chr1:135454661-135454683	MIMAT0022357	mmu-miR-1231-5p	0.50175	0.413446	1.90391	0.217157	0.828086	NA	0	2.05531	0	0	0	0.859488	1.8825	0.721943	0	0	0
chr1:151442393-151442416	MIMAT0029884	mmu-miR-7682-5p	0	NA	NA	NA	NA	NA	0	0	0	0	0	0	0	0	0	0	0
chr1:164217678-164217701	MIMAT0049822	mmu-miR-12178-5p	0	NA	NA	NA	NA	NA	0	0	0	0	0	0	0	0	0	0	0
chr1:164217719-164217740	MIMAT0049823	mmu-miR-12178-3p	0.0614859	-0.750537	3.14975	-0.238285	0.81166	NA	0	0	0	0	0.676345	0	0	0	0	0	0
chr1:167290125-167290146	MIMAT0025090	mmu-miR-6347	0	NA	NA	NA	NA	NA	0	0	0	0	0	0	0	0	0	0	0
chr1:168490740-168490761	MIMAT0025091	mmu-miR-6348	0	NA	NA	NA	NA	NA	0	0	0	0	0	0	0	0	0	0	0
chr1:169019041-169019061	MIMAT0025097	mmu-miR-6354	0	NA	NA	NA	NA	NA	0	0	0	0	0	0	0	0	0	0	0
chr1:171064629-171064652	MIMAT0029792	mmu-miR-6546-5p	0	NA	NA	NA	NA	NA	0	0	0	0	0	0	0	0	0	0	0
chr1:171064591-171064611	MIMAT0029793	mmu-miR-6546-3p	0	NA	NA	NA	NA	NA	0	0	0	0	0	0	0	0	0	0	0
chr1:171641879-171641900	MIMAT0029886	mmu-miR-7683-5p	0	NA	NA	NA	NA	NA	0	0	0	0	0	0	0	0	0	0	0
chr1:171641840-171641860	MIMAT0029887	mmu-miR-7683-3p	0	NA	NA	NA	NA	NA	0	0	0	0	0	0	0	0	0	0	0
chr1:177579511-177579529	MIMAT0049824	mmu-miR-12179-5p	0	NA	NA	NA	NA	NA	0	0	0	0	0	0	0	0	0	0	0
chr1:180587206-180587227	MIMAT0027708	mmu-miR-6904-5p	0	NA	NA	NA	NA	NA	0	0	0	0	0	0	0	0	0	0	0
chr1:180587243-180587260	MIMAT0027709	mmu-miR-6904-3p	0.239214	0.211254	2.51114	0.0841269	0.932956	NA	0	0	0	0	0.676345	0	0	0	0	0.795177	1.15983
chr1:185313360-185313381	MIMAT0016999	mmu-miR-194-1-3p	0.210879	0.788319	3.14975	0.25028	0.802371	NA	0	0	0	0	0	0	0	0	0	0	2.31967
chr1:185313647-185313667	MIMAT0017169	mmu-miR-215-3p	0	NA	NA	NA	NA	NA	0	0	0	0	0	0	0	0	0	0	0
chr1:191998602-191998623	MIMAT0020614	mmu-miR-3473c	0	NA	NA	NA	NA	NA	0	0	0	0	0	0	0	0	0	0	0
chr1:193507467-193507488	MIMAT0017003	mmu-miR-205-3p	0.165712	-0.269644	3.14975	-0.0856079	0.931778	NA	0	1.02765	0	0	0	0	0	0	0	0.795177	0
chr1:194822035-194822054	MIMAT0019340	mmu-miR-3962	0.394537	0.15163	1.82936	0.0828868	0.933942	NA	0	0	1.06765	0	0.676345	0.859488	0.941252	0	0	0.795177	0
chr10:7836441-7836464	MIMAT0020611	mmu-miR-5104	0	NA	NA	NA	NA	NA	0	0	0	0	0	0	0	0	0	0	0
chr10:20297593-20297613	MIMAT0025166	mmu-miR-6413	0	NA	NA	NA	NA	NA	0	0	0	0	0	0	0	0	0	0	0
chr10:22729410-22729432	MIMAT0029832	mmu-miR-7663-5p	0.0722888	0.307426	3.14975	0.0976031	0.922247	NA	0	0	0	0	0	0	0	0	0	0.795177	0
chr10:22729372-22729393	MIMAT0029833	mmu-miR-7663-3p	0.292612	-0.915018	2.77066	-0.330253	0.741209	NA	0	0	0	2.35924	0	0.859488	0	0	0	0	0
chr10:24910669-24910691	MIMAT0027710	mmu-miR-6905-5p	0.299487	-0.325939	2.39326	-0.13619	0.891671	NA	0	1.02765	0	0	0.676345	0	0	0	0	1.59035	0
chr10:24910711-24910731	MIMAT0027711	mmu-miR-6905-3p	0	NA	NA	NA	NA	NA	0	0	0	0	0	0	0	0	0	0	0
chr10:41670774-41670793	MIMAT0020367	mmu-miR-3473b	0	NA	NA	NA	NA	NA	0	0	0	0	0	0	0	0	0	0	0
chr10:44359734-44359755	MIMAT0022729	mmu-miR-1929-3p	0	NA	NA	NA	NA	NA	0	0	0	0	0	0	0	0	0	0	0
chr10:60126777-60126800	MIMAT0027712	mmu-miR-6906-5p	0.662707	-0.759698	2.07081	-0.366859	0.713724	NA	0	4.11062	0	0	0	0.859488	0	0	0	0	2.31967
chr10:60923077-60923100	MIMAT0025161	mmu-miR-6408	0	NA	NA	NA	NA	NA	0	0	0	0	0	0	0	0	0	0	0
chr10:60960802-60960824	MIMAT0005848	mmu-miR-466j	0	NA	NA	NA	NA	NA	0	0	0	0	0	0	0	0	0	0	0
chr10:61774795-61774813	MIMAT0020616	mmu-miR-5108	0	NA	NA	NA	NA	NA	0	0	0	0	0	0	0	0	0	0	0
chr10:62194206-62194227	MIMAT0029830	mmu-miR-7662-5p	0.111091	0.307426	3.14975	0.0976031	0.922247	NA	0	0	0	0	0	0	0	0	1.222	0	0
chr10:62194167-62194190	MIMAT0029831	mmu-miR-7662-3p	0	NA	NA	NA	NA	NA	0	0	0	0	0	0	0	0	0	0	0
chr10:62682508-62682532	MIMAT0028398	mmu-miR-7215-5p	0	NA	NA	NA	NA	NA	0	0	0	0	0	0	0	0	0	0	0
chr10:62682536-62682558	MIMAT0028399	mmu-miR-7215-3p	0	NA	NA	NA	NA	NA	0	0	0	0	0	0	0	0	0	0	0
chr10:76008993-76009015	MIMAT0025162	mmu-miR-6409	0	NA	NA	NA	NA	NA	0	0	0	0	0	0	0	0	0	0	0
chr10:76207333-76207354	MIMAT0003452	mmu-miR-678	0	NA	NA	NA	NA	NA	0	0	0	0	0	0	0	0	0	0	0
chr10:77641274-77641295	MIMAT0017340	mmu-miR-1930-3p	0	NA	NA	NA	NA	NA	0	0	0	0	0	0	0	0	0	0	0
chr10:78340186-78340207	MIMAT0029824	mmu-miR-7659-5p	0.107238	-0.750537	3.14975	-0.238285	0.81166	NA	0	0	0	1.17962	0	0	0	0	0	0	0
chr10:78340150-78340172	MIMAT0029825	mmu-miR-7659-3p	0.0855684	0.307426	3.14975	0.0976031	0.922247	NA	0	0	0	0	0	0	0.941252	0	0	0	0
chr10:78408522-78408543	MIMAT0027714	mmu-miR-6907-5p	0	NA	NA	NA	NA	NA	0	0	0	0	0	0	0	0	0	0	0
chr10:78408477-78408499	MIMAT0027715	mmu-miR-6907-3p	0.0722888	0.307426	3.14975	0.0976031	0.922247	NA	0	0	0	0	0	0	0	0	0	0.795177	0
chr10:78434803-78434824	MIMAT0025163	mmu-miR-6410	0	NA	NA	NA	NA	NA	0	0	0	0	0	0	0	0	0	0	0
chr10:78445131-78445152	MIMAT0027716	mmu-miR-6908-5p	0.657571	-0.401777	1.50627	-0.266737	0.789672	NA	1.47077	1.02765	0	0	1.35269	1.71898	0.941252	0.721943	0	0	0
chr10:79531064-79531085	MIMAT0027718	mmu-miR-6909-5p	0.0855684	0.307426	3.14975	0.0976031	0.922247	NA	0	0	0	0	0	0	0.941252	0	0	0	0
chr10:79531029-79531050	MIMAT0027719	mmu-miR-6909-3p	0	NA	NA	NA	NA	NA	0	0	0	0	0	0	0	0	0	0	0
chr10:79862592-79862614	MIMAT0027720	mmu-miR-6910-5p	0	NA	NA	NA	NA	NA	0	0	0	0	0	0	0	0	0	0	0
chr10:79862629-79862650	MIMAT0027721	mmu-miR-6910-3p	0	NA	NA	NA	NA	NA	0	0	0	0	0	0	0	0	0	0	0
chr10:80278169-80278191	MIMAT0027722	mmu-miR-6911-5p	0.36311	1.00675	1.82327	0.552169	0.580833	NA	0	0	0	0	0.676345	0.859488	0.941252	0.721943	0	0.795177	0
chr10:80609265-80609286	MIMAT0027724	mmu-miR-6912-5p	0.0934232	-0.750537	3.14975	-0.238285	0.81166	NA	0	1.02765	0	0	0	0	0	0	0	0	0
chr10:80609305-80609329	MIMAT0027725	mmu-miR-6912-3p	0.244866	0.211254	2.49437	0.0846923	0.932506	NA	0	0	0	0	0.676345	0	0	0	1.222	0.795177	0
chr10:80828808-80828827	MIMAT0009459	mmu-miR-1982-5p	0.186846	-1.40012	3.14284	-0.445496	0.655961	NA	0	2.05531	0	0	0	0	0	0	0	0	0
chr10:81271654-81271675	MIMAT0014823	mmu-miR-3057-3p	0.619432	0.820885	1.55966	0.526321	0.598665	NA	0	2.05531	0	0	0	0.859488	0	0.721943	1.222	0.795177	1.15983
chr10:81386352-81386373	MIMAT0027726	mmu-miR-6913-5p	0	NA	NA	NA	NA	NA	0	0	0	0	0	0	0	0	0	0	0
chr10:81416240-81416261	MIMAT0029867	mmu-miR-1191b-3p	0	NA	NA	NA	NA	NA	0	0	0	0	0	0	0	0	0	0	0
chr10:92137152-92137172	MIMAT0014825	mmu-miR-1251-3p	0.133706	-0.750537	3.14975	-0.238285	0.81166	NA	1.47077	0	0	0	0	0	0	0	0	0	0
chr10:93162879-93162900	MIMAT0009394	mmu-miR-1931	0.224176	-0.805764	2.5512	-0.315838	0.752126	NA	0	0	1.06765	0	0.676345	0	0	0.721943	0	0	0
chr10:93433142-93433162	MIMAT0029907	mmu-miR-7688-3p	0.29741	0.211255	2.36099	0.0894772	0.928703	NA	1.47077	0	0	0	0	0.859488	0.941252	0	0	0	0
chr10:94586178-94586199	MIMAT0028390	mmu-miR-7211-5p	0.0722888	0.307426	3.14975	0.0976031	0.922247	NA	0	0	0	0	0	0	0	0	0	0.795177	0
chr10:94586137-94586159	MIMAT0028391	mmu-miR-7211-3p	0	NA	NA	NA	NA	NA	0	0	0	0	0	0	0	0	0	0	0
chr10:95559286-95559308	MIMAT0014813	mmu-miR-3058-5p	0.458807	-0.856161	1.75634	-0.487469	0.625926	NA	0	1.02765	0	1.17962	0.676345	0	0.941252	0	1.222	0	0
chr10:104287290-104287310	MIMAT0025164	mmu-miR-6411	0	NA	NA	NA	NA	NA	0	0	0	0	0	0	0	0	0	0	0
chr10:111185680-111185697	MIMAT0049825	mmu-miR-12180-3p	0	NA	NA	NA	NA	NA	0	0	0	0	0	0	0	0	0	0	0
chr10:120448052-120448073	MIMAT0003896	mmu-miR-763	0	NA	NA	NA	NA	NA	0	0	0	0	0	0	0	0	0	0	0
chr10:122648412-122648433	MIMAT0025165	mmu-miR-6412	0.210879	0.788319	3.14975	0.25028	0.802371	NA	0	0	0	0	0	0	0	0	0	0	2.31967
chr10:122679336-122679357	MIMAT0031408	mmu-miR-8104	0	NA	NA	NA	NA	NA	0	0	0	0	0	0	0	0	0	0	0
chr10:126998471-126998486	MIMAT0003166	mmu-miR-546	0	NA	NA	NA	NA	NA	0	0	0	0	0	0	0	0	0	0	0
chr10:128382843-128382866	MIMAT0027728	mmu-miR-6914-5p	0.0614859	-0.750537	3.14975	-0.238285	0.81166	NA	0	0	0	0	0.676345	0	0	0	0	0	0
chr10:128388837-128388860	MIMAT0027730	mmu-miR-6915-5p	0.398688	-1.49716	2.21217	-0.676785	0.498542	NA	1.47077	2.05531	0	0	0	0.859488	0	0	0	0	0
chr10:128512005-128512025	MIMAT0027732	mmu-miR-6916-5p	0	NA	NA	NA	NA	NA	0	0	0	0	0	0	0	0	0	0	0
chr10:128511968-128511989	MIMAT0027733	mmu-miR-6916-3p	0	NA	NA	NA	NA	NA	0	0	0	0	0	0	0	0	0	0	0
chr10:128584472-128584492	MIMAT0027734	mmu-miR-6917-5p	0	NA	NA	NA	NA	NA	0	0	0	0	0	0	0	0	0	0	0
chr10:128584437-128584458	MIMAT0027735	mmu-miR-6917-3p	0.192807	-0.269643	3.11058	-0.086686	0.930921	NA	0	0	0	1.17962	0	0	0.941252	0	0	0	0
chr11:4139377-4139396	MIMAT0014826	mmu-miR-3060-5p	0	NA	NA	NA	NA	NA	0	0	0	0	0	0	0	0	0	0	0
chr11:4891381-4891402	MIMAT0027737	mmu-miR-6918-3p	0	NA	NA	NA	NA	NA	0	0	0	0	0	0	0	0	0	0	0
chr11:6401630-6401651	MIMAT0029804	mmu-miR-7651-5p	0.678664	-0.627177	1.84201	-0.340485	0.733492	NA	0	2.05531	1.06765	0	0.676345	0	0	0	3.66601	0	0
chr11:6401670-6401693	MIMAT0029805	mmu-miR-7651-3p	0.0656312	0.307426	3.14975	0.0976031	0.922247	NA	0	0	0	0	0	0	0	0.721943	0	0	0
chr11:21344640-21344663	MIMAT0009396	mmu-miR-1933-5p	0.210879	0.788319	3.14975	0.25028	0.802371	NA	0	0	0	0	0	0	0	0	0	0	2.31967
chr11:26202258-26202280	MIMAT0025116	mmu-miR-6372	0	NA	NA	NA	NA	NA	0	0	0	0	0	0	0	0	0	0	0
chr11:28746244-28746265	MIMAT0017233	mmu-miR-216b-3p	0	NA	NA	NA	NA	NA	0	0	0	0	0	0	0	0	0	0	0
chr11:28746244-28746266	MIMAT0029888	mmu-miR-216c-5p	0	NA	NA	NA	NA	NA	0	0	0	0	0	0	0	0	0	0	0
chr11:28757018-28757039	MIMAT0000662	mmu-miR-216a-5p	4.42507	-2.51913	1.1861	-2.12387	NA	NA	0	1.02765	3.20294	35.3886	0.676345	1.71898	4.70626	0	0	0.795177	1.15983
chr11:28763761-28763783	MIMAT0000679	mmu-miR-217-5p	13.7567	-2.66961	1.31853	-2.02469	NA	NA	2.94154	2.05531	3.20294	119.142	0	2.57846	8.47127	5.0536	2.44401	0.795177	4.63933
chr11:35782410-35782432	MIMAT0017024	mmu-miR-103-1-5p	0.166925	-0.269644	3.14975	-0.0856079	0.931778	NA	0	0	0	0	0.676345	0	0	0	0	0	1.15983
chr11:43374399-43374420	MIMAT0016989	mmu-miR-146a-3p	0.395416	0.722343	2.22599	0.324504	0.745556	NA	1.47077	0	0	0	0	1.71898	0	0	0	0	1.15983
chr11:46102300-46102322	MIMAT0031403	mmu-miR-8100	0	NA	NA	NA	NA	NA	0	0	0	0	0	0	0	0	0	0	0
chr11:46170087-46170106	MIMAT0028446	mmu-miR-7239-5p	0	NA	NA	NA	NA	NA	0	0	0	0	0	0	0	0	0	0	0
chr11:46170124-46170143	MIMAT0028447	mmu-miR-7239-3p	0.16269	-0.269644	3.14975	-0.0856079	0.931778	NA	0	0	1.06765	0	0	0	0	0.721943	0	0	0
chr11:50232250-50232272	MIMAT0027738	mmu-miR-6919-5p	0.107238	-0.750537	3.14975	-0.238285	0.81166	NA	0	0	0	1.17962	0	0	0	0	0	0	0
chr11:50232286-50232306	MIMAT0027739	mmu-miR-6919-3p	0.274787	0.211255	2.41397	0.0875135	0.930263	NA	0	0	1.06765	0	0	0	0	0	0	0.795177	1.15983
chr11:50357799-50357820	MIMAT0004210	mmu-miR-804	0	NA	NA	NA	NA	NA	0	0	0	0	0	0	0	0	0	0	0
chr11:53409202-53409223	MIMAT0027740	mmu-miR-6920-5p	0.131262	0.788319	3.14975	0.25028	0.802371	NA	0	0	0	0	0	0	0	1.44389	0	0	0
chr11:53409245-53409265	MIMAT0027741	mmu-miR-6920-3p	0.369237	0.811132	2.29562	0.35334	0.723834	NA	0	0	0	0	0.676345	0	0.941252	0	2.44401	0	0
chr11:53763632-53763654	MIMAT0029848	mmu-miR-7671-5p	0	NA	NA	NA	NA	NA	0	0	0	0	0	0	0	0	0	0	0
chr11:53763597-53763618	MIMAT0029849	mmu-miR-7671-3p	0.0781353	0.307426	3.14975	0.0976031	0.922247	NA	0	0	0	0	0	0.859488	0	0	0	0	0
chr11:55501226-55501247	MIMAT0029810	mmu-miR-7652-5p	0	NA	NA	NA	NA	NA	0	0	0	0	0	0	0	0	0	0	0
chr11:55501261-55501281	MIMAT0029811	mmu-miR-7652-3p	0	NA	NA	NA	NA	NA	0	0	0	0	0	0	0	0	0	0	0
chr11:60200591-60200612	MIMAT0027742	mmu-miR-6921-5p	0.0934232	-0.750537	3.14975	-0.238285	0.81166	NA	0	1.02765	0	0	0	0	0	0	0	0	0
chr11:60200538-60200558	MIMAT0027743	mmu-miR-6921-3p	0.611821	1.75927	1.64911	1.0668	0.286063	NA	0	0	0	0	0.676345	0.859488	0	0	2.44401	1.59035	1.15983
chr11:60202300-60202322	MIMAT0027744	mmu-miR-6922-5p	0.522339	0.516357	1.60961	0.320797	0.748364	NA	1.47077	0	0	0	0.676345	0.859488	0	0.721943	1.222	0.795177	0
chr11:60202262-60202284	MIMAT0027745	mmu-miR-6922-3p	0.386417	1.90316	2.18313	0.871759	0.38334	NA	0	0	0	0	0	1.71898	0.941252	0	0	1.59035	0
chr11:60728698-60728718	MIMAT0020607	mmu-miR-5100	0.624714	-0.745859	1.54615	-0.482397	0.629524	NA	0	2.05531	0	1.17962	0.676345	0.859488	0.941252	0	0	0	1.15983
chr11:67099804-67099827	MIMAT0027746	mmu-miR-6923-5p	0	NA	NA	NA	NA	NA	0	0	0	0	0	0	0	0	0	0	0
chr11:67099855-67099875	MIMAT0027747	mmu-miR-6923-3p	0	NA	NA	NA	NA	NA	0	0	0	0	0	0	0	0	0	0	0
chr11:68220917-68220938	MIMAT0025159	mmu-miR-6406	0	NA	NA	NA	NA	NA	0	0	0	0	0	0	0	0	0	0	0
chr11:68990597-68990615	MIMAT0014831	mmu-miR-3062-3p	0	NA	NA	NA	NA	NA	0	0	0	0	0	0	0	0	0	0	0
chr11:69635419-69635439	MIMAT0005846	mmu-miR-467f	0	NA	NA	NA	NA	NA	0	0	0	0	0	0	0	0	0	0	0
chr11:69663092-69663113	MIMAT0017341	mmu-miR-1934-3p	0.244797	-0.269642	2.87564	-0.0937679	0.925294	NA	1.47077	0	0	0	0	0	0	0	1.222	0	0
chr11:69882067-69882089	MIMAT0027748	mmu-miR-6924-5p	0	NA	NA	NA	NA	NA	0	0	0	0	0	0	0	0	0	0	0
chr11:69882032-69882052	MIMAT0027749	mmu-miR-6924-3p	0	NA	NA	NA	NA	NA	0	0	0	0	0	0	0	0	0	0	0
chr11:70438256-70438279	MIMAT0028127	mmu-miR-7115-5p	0.390833	-0.416659	1.99843	-0.208493	0.834844	NA	1.47077	1.02765	0	0	0	0.859488	0.941252	0	0	0	0
chr11:70438297-70438318	MIMAT0028128	mmu-miR-7115-3p	0.251005	0.211254	2.47678	0.0852941	0.932028	NA	0	0	0	1.17962	0	0.859488	0	0.721943	0	0	0
chr11:70705995-70706016	MIMAT0027750	mmu-miR-6925-5p	0.254916	0.211255	2.46588	0.0856711	0.931728	NA	0	0	1.06765	0	0	0	0.941252	0	0	0.795177	0
chr11:70706035-70706052	MIMAT0027751	mmu-miR-6925-3p	0	NA	NA	NA	NA	NA	0	0	0	0	0	0	0	0	0	0	0
chr11:72388765-72388785	MIMAT0025081	mmu-miR-6338	0	NA	NA	NA	NA	NA	0	0	0	0	0	0	0	0	0	0	0
chr11:74868168-74868189	MIMAT0027752	mmu-miR-6926-5p	0.144578	0.788319	3.14975	0.25028	0.802371	NA	0	0	0	0	0	0	0	0	0	1.59035	0
chr11:75551480-75551501	MIMAT0019356	mmu-miR-3971	0.264494	0.211255	2.44017	0.0865738	0.93101	NA	0	1.02765	0	0	0	0	0	0.721943	0	0	1.15983
chr11:77467518-77467539	MIMAT0049826	mmu-miR-12181-5p	0.239146	-0.269642	2.89759	-0.0930576	0.925858	NA	1.47077	0	0	0	0	0	0	0	0	0	1.15983
chr11:77467553-77467573	MIMAT0049827	mmu-miR-12181-3p	0.336783	0.6495	2.04463	0.317662	0.750742	NA	0	1.02765	0	0	0	0	0	0.721943	0	0.795177	1.15983
chr11:78073219-78073239	MIMAT0025178	mmu-miR-451b	0.651614	-0.745372	1.65078	-0.451527	0.65161	NA	0	1.02765	0	2.35924	0.676345	0	1.8825	0	1.222	0	0
chr11:78178827-78178848	MIMAT0029812	mmu-miR-7653-5p	0.391589	-1.60439	1.9214	-0.835009	0.403712	NA	0	1.02765	1.06765	0	1.35269	0.859488	0	0	0	0	0
chr11:82985046-82985065	MIMAT0029872	mmu-miR-7679-5p	0	NA	NA	NA	NA	NA	0	0	0	0	0	0	0	0	0	0	0
chr11:82985003-82985026	MIMAT0029873	mmu-miR-7679-3p	0	NA	NA	NA	NA	NA	0	0	0	0	0	0	0	0	0	0	0
chr11:85760675-85760699	MIMAT0020618	mmu-miR-5110	0	NA	NA	NA	NA	NA	0	0	0	0	0	0	0	0	0	0	0
chr11:86852636-86852657	MIMAT0049828	mmu-miR-12182-5p	0	NA	NA	NA	NA	NA	0	0	0	0	0	0	0	0	0	0	0
chr11:86852604-86852625	MIMAT0049829	mmu-miR-12182-3p	0	NA	NA	NA	NA	NA	0	0	0	0	0	0	0	0	0	0	0
chr11:95963347-95963367	MIMAT0014832	mmu-miR-3063-5p	0	NA	NA	NA	NA	NA	0	0	0	0	0	0	0	0	0	0	0
chr11:95963304-95963325	MIMAT0014833	mmu-miR-3063-3p	0	NA	NA	NA	NA	NA	0	0	0	0	0	0	0	0	0	0	0
chr11:96265187-96265208	MIMAT0000518	mmu-miR-196a-5p	0.157857	0.788319	3.14975	0.25028	0.802371	NA	0	0	0	0	0	0	0.941252	0	0	0.795177	0
chr11:96265225-96265246	MIMAT0017013	mmu-miR-196a-1-3p	0	NA	NA	NA	NA	NA	0	0	0	0	0	0	0	0	0	0	0
chr11:96317227-96317248	MIMAT0004659	mmu-miR-10a-3p	0.212678	-0.269643	3.01115	-0.0895482	0.928646	NA	0	0	0	1.17962	0	0	0	0	0	0	1.15983
chr11:97146402-97146419	MIMAT0028438	mmu-miR-7235-5p	0.344585	0.211254	2.62792	0.0803881	0.935929	NA	1.47077	0	0	0	0	0	0	0	0	0	2.31967
chr11:97677060-97677081	MIMAT0027754	mmu-miR-6927-5p	0	NA	NA	NA	NA	NA	0	0	0	0	0	0	0	0	0	0	0
chr11:97677106-97677126	MIMAT0027755	mmu-miR-6927-3p	0.241839	1.30056	2.93368	0.443321	0.657533	NA	0	0	0	0	0	1.71898	0.941252	0	0	0	0
chr11:97744974-97744995	MIMAT0031406	mmu-miR-8102	0	NA	NA	NA	NA	NA	0	0	0	0	0	0	0	0	0	0	0
chr11:100478455-100478475	MIMAT0028129	mmu-miR-7116-5p	0.0656312	0.307426	3.14975	0.0976031	0.922247	NA	0	0	0	0	0	0	0	0.721943	0	0	0
chr11:101030345-101030367	MIMAT0027756	mmu-miR-6928-5p	0.342629	0.671061	2.04016	0.328926	0.742212	NA	0	1.02765	0	0	0	0.859488	0	0.721943	0	0	1.15983
chr11:101419228-101419248	MIMAT0027758	mmu-miR-6929-5p	0.0656312	0.307426	3.14975	0.0976031	0.922247	NA	0	0	0	0	0	0	0	0.721943	0	0	0
chr11:102230103-102230124	MIMAT0031405	mmu-miR-8101	0	NA	NA	NA	NA	NA	0	0	0	0	0	0	0	0	0	0	0
chr11:102404960-102404982	MIMAT0027760	mmu-miR-6930-5p	0.379491	-1.47556	2.23535	-0.660103	0.509187	NA	0	0	2.13529	1.17962	0	0.859488	0	0	0	0	0
chr11:102404920-102404940	MIMAT0027761	mmu-miR-6930-3p	0	NA	NA	NA	NA	NA	0	0	0	0	0	0	0	0	0	0	0
chr11:102999896-102999916	MIMAT0027762	mmu-miR-6931-5p	0.111091	0.307426	3.14975	0.0976031	0.922247	NA	0	0	0	0	0	0	0	0	1.222	0	0
chr11:107996848-107996867	MIMAT0028414	mmu-miR-7223-5p	0	NA	NA	NA	NA	NA	0	0	0	0	0	0	0	0	0	0	0
chr11:107996900-107996916	MIMAT0028415	mmu-miR-7223-3p	0	NA	NA	NA	NA	NA	0	0	0	0	0	0	0	0	0	0	0
chr11:115795824-115795846	MIMAT0022369	mmu-miR-5621-5p	0	NA	NA	NA	NA	NA	0	0	0	0	0	0	0	0	0	0	0
chr11:118002279-118002300	MIMAT0027766	mmu-miR-6933-5p	0.509896	-2.00151	1.78914	-1.1187	0.263268	NA	0	0	2.13529	1.17962	1.35269	0	0.941252	0	0	0	0
chr11:118002324-118002343	MIMAT0027767	mmu-miR-6933-3p	0.0656312	0.307426	3.14975	0.0976031	0.922247	NA	0	0	0	0	0	0	0	0.721943	0	0	0
chr11:119154111-119154132	MIMAT0027768	mmu-miR-6934-5p	0.595403	0.820261	1.5545	0.527668	0.59773	NA	1.47077	0	0	0	0.676345	0	0.941252	1.44389	1.222	0.795177	0
chr11:119154076-119154097	MIMAT0027769	mmu-miR-6934-3p	0.171558	-0.269644	3.14975	-0.0856079	0.931778	NA	0	1.02765	0	0	0	0.859488	0	0	0	0	0
chr11:119390524-119390545	MIMAT0009395	mmu-miR-1932	0.19666	0.78832	3.09018	0.255105	0.798642	NA	0	0	0	0	0	0	0.941252	0	1.222	0	0
chr11:120347387-120347408	MIMAT0027770	mmu-miR-6935-5p	0	NA	NA	NA	NA	NA	0	0	0	0	0	0	0	0	0	0	0
chr11:120347350-120347369	MIMAT0027771	mmu-miR-6935-3p	0.493438	-0.906805	1.74004	-0.521141	0.602269	NA	1.47077	0	0	1.17962	0.676345	0	0.941252	0	0	0	1.15983
chr11:121387181-121387204	MIMAT0028440	mmu-miR-7236-5p	0.402655	0.722561	1.97551	0.36576	0.714544	NA	1.47077	0	0	0	0	0	0.941252	0	1.222	0.795177	0
chr12:11299887-11299908	MIMAT0029858	mmu-miR-7675-5p	0	NA	NA	NA	NA	NA	0	0	0	0	0	0	0	0	0	0	0
chr12:15801064-15801085	MIMAT0025134	mmu-miR-6387	0	NA	NA	NA	NA	NA	0	0	0	0	0	0	0	0	0	0	0
chr12:17355441-17355462	MIMAT0014839	mmu-miR-3066-3p	0.445188	1.21193	2.14973	0.563758	0.572919	NA	0	0	1.06765	0	0	0	0	1.44389	0	2.38553	0
chr12:28679325-28679348	MIMAT0027774	mmu-miR-6937-5p	0.0970587	-0.750537	3.14975	-0.238285	0.81166	NA	0	0	1.06765	0	0	0	0	0	0	0	0
chr12:28679367-28679389	MIMAT0027775	mmu-miR-6937-3p	0	NA	NA	NA	NA	NA	0	0	0	0	0	0	0	0	0	0	0
chr12:35194849-35194869	MIMAT0003457	mmu-miR-680	0	NA	NA	NA	NA	NA	0	0	0	0	0	0	0	0	0	0	0
chr12:40222782-40222803	MIMAT0009402	mmu-miR-1938	0	NA	NA	NA	NA	NA	0	0	0	0	0	0	0	0	0	0	0
chr12:44210313-44210334	MIMAT0022385	mmu-miR-5627-5p	0	NA	NA	NA	NA	NA	0	0	0	0	0	0	0	0	0	0	0
chr12:54645943-54645964	MIMAT0007871	mmu-miR-1892	0.105439	0.307426	3.14975	0.0976031	0.922247	NA	0	0	0	0	0	0	0	0	0	0	1.15983
chr12:69763923-69763943	MIMAT0003458	mmu-miR-681	0	NA	NA	NA	NA	NA	0	0	0	0	0	0	0	0	0	0	0
chr12:73045918-73045937	MIMAT0039309	mmu-miR-9718	0	NA	NA	NA	NA	NA	0	0	0	0	0	0	0	0	0	0	0
chr12:75909154-75909175	MIMAT0020608	mmu-miR-5101	0.384041	-0.41674	2.00066	-0.208301	0.834994	NA	0	1.02765	0	1.17962	0	0	0	0	1.222	0.795177	0
chr12:76533143-76533166	MIMAT0020646	mmu-miR-5135	0	NA	NA	NA	NA	NA	0	0	0	0	0	0	0	0	0	0	0
chr12:81166165-81166187	MIMAT0014840	mmu-miR-3067-5p	0	NA	NA	NA	NA	NA	0	0	0	0	0	0	0	0	0	0	0
chr12:81166201-81166223	MIMAT0014841	mmu-miR-3067-3p	0	NA	NA	NA	NA	NA	0	0	0	0	0	0	0	0	0	0	0
chr12:85245958-85245980	MIMAT0027776	mmu-miR-6938-5p	0.0781353	0.307426	3.14975	0.0976031	0.922247	NA	0	0	0	0	0	0.859488	0	0	0	0	0
chr12:93927373-93927393	MIMAT0031401	mmu-miR-8099	0	NA	NA	NA	NA	NA	0	0	0	0	0	0	0	0	0	0	0
chr12:101021692-101021713	MIMAT0005847	mmu-miR-1190	0	NA	NA	NA	NA	NA	0	0	0	0	0	0	0	0	0	0	0
chr12:102684943-102684965	MIMAT0009400	mmu-miR-1936	0.154909	-1.28404	3.14459	-0.408332	0.68303	NA	0	1.02765	0	0	0.676345	0	0	0	0	0	0
chr12:104269236-104269253	MIMAT0049830	mmu-miR-12183-5p	0	NA	NA	NA	NA	NA	0	0	0	0	0	0	0	0	0	0	0
chr12:109586331-109586356	MIMAT0017238	mmu-miR-665-5p	0.488979	-0.228403	1.75419	-0.130204	0.896405	NA	0	0	1.06765	0	1.35269	0	0.941252	0	1.222	0.795177	0
chr12:109587959-109587981	MIMAT0014846	mmu-miR-3070-5p	0.715001	1.943	1.5036	1.29223	0.196278	NA	0	0	1.06765	0	0	0.859488	0.941252	0.721943	0	0.795177	3.4795
chr12:109587999-109588020	MIMAT0014847	mmu-miR-3070-3p	0.696297	-0.0510814	1.84134	-0.0277414	0.977868	NA	0	0	0	3.53886	0	0.859488	0.941252	0	0	0	2.31967
chr12:109588648-109588669	MIMAT0014849	mmu-miR-3070-2-3p	0.612363	-0.14016	1.5637	-0.0896339	0.928578	NA	0	1.02765	1.06765	1.17962	0	0	0	1.44389	1.222	0.795177	0
chr12:109588608-109588630	MIMAT0014846_1	mmu-miR-3070-5p	0.429696	-0.82976	1.77903	-0.466412	0.640921	NA	0	1.02765	1.06765	0	0.676345	0	0	0	0	0.795177	1.15983
chr12:109595006-109595028	MIMAT0012771	mmu-miR-432	0.111091	0.307426	3.14975	0.0976031	0.922247	NA	0	0	0	0	0	0	0	0	1.222	0	0
chr12:109682207-109682228	MIMAT0004847	mmu-miR-882	0	NA	NA	NA	NA	NA	0	0	0	0	0	0	0	0	0	0	0
chr12:109712361-109712381	MIMAT0017331	mmu-miR-1197-5p	0	NA	NA	NA	NA	NA	0	0	0	0	0	0	0	0	0	0	0
chr12:109712823-109712843	MIMAT0017235	mmu-miR-758-5p	0.165712	-0.269644	3.14975	-0.0856079	0.931778	NA	0	1.02765	0	0	0	0	0	0	0	0.795177	0
chr12:109715334-109715355	MIMAT0017215	mmu-miR-494-5p	0.598569	-1.31082	1.65415	-0.792444	0.428102	NA	1.47077	2.05531	0	0	0.676345	0	0	0	1.222	0	1.15983
chr12:109723235-109723256	MIMAT0004897	mmu-miR-654-5p	0	NA	NA	NA	NA	NA	0	0	0	0	0	0	0	0	0	0	0
chr12:109723270-109723291	MIMAT0004898	mmu-miR-654-3p	0	NA	NA	NA	NA	NA	0	0	0	0	0	0	0	0	0	0	0
chr12:109735669-109735692	MIMAT0004870	mmu-miR-453	0	NA	NA	NA	NA	NA	0	0	0	0	0	0	0	0	0	0	0
chr12:109747893-109747914	MIMAT0014852	mmu-miR-3072-5p	0.637911	1.75542	1.80642	0.971764	0.331168	NA	0	1.02765	0	0	0	0	0	0	2.44401	2.38553	1.15983
chr12:112109252-112109273	MIMAT0014854	mmu-miR-3073a-5p	0.0722888	0.307426	3.14975	0.0976031	0.922247	NA	0	0	0	0	0	0	0	0	0	0.795177	0
chr12:112109290-112109311	MIMAT0014855	mmu-miR-3073a-3p	0.169347	-0.269644	3.14975	-0.0856079	0.931778	NA	0	0	1.06765	0	0	0	0	0	0	0.795177	0
chr12:112109288-112109309	MIMAT0022375	mmu-miR-3073b-5p	0.169347	-0.269644	3.14975	-0.0856079	0.931778	NA	0	0	1.06765	0	0	0	0	0	0	0.795177	0
chr12:112109250-112109271	MIMAT0022376	mmu-miR-3073b-3p	0.0722888	0.307426	3.14975	0.0976031	0.922247	NA	0	0	0	0	0	0	0	0	0	0.795177	0
chr12:112659327-112659347	MIMAT0027778	mmu-miR-6939-5p	0	NA	NA	NA	NA	NA	0	0	0	0	0	0	0	0	0	0	0
chr12:112659277-112659296	MIMAT0027779	mmu-miR-6939-3p	0.523695	-0.414625	2.15006	-0.192844	0.847081	NA	0	3.08296	0	0	0	0	1.8825	0	0	0.795177	0
chr12:112733328-112733350	MIMAT0027780	mmu-miR-6940-5p	0	NA	NA	NA	NA	NA	0	0	0	0	0	0	0	0	0	0	0
chr12:112920515-112920535	MIMAT0027782	mmu-miR-6941-5p	0.0722888	0.307426	3.14975	0.0976031	0.922247	NA	0	0	0	0	0	0	0	0	0	0.795177	0
chr12:114469444-114469466	MIMAT0028094	mmu-miR-7094-1-5p	0	NA	NA	NA	NA	NA	0	0	0	0	0	0	0	0	0	0	0
chr12:114469408-114469428	MIMAT0028095	mmu-miR-7094-3p	0	NA	NA	NA	NA	NA	0	0	0	0	0	0	0	0	0	0	0
chr12:114513672-114513694	MIMAT0028096	mmu-miR-7094b-2-5p	0	NA	NA	NA	NA	NA	0	0	0	0	0	0	0	0	0	0	0
chr12:114513636-114513656	MIMAT0028095_1	mmu-miR-7094-3p	0	NA	NA	NA	NA	NA	0	0	0	0	0	0	0	0	0	0	0
chr12:115695773-115695793	MIMAT0025135	mmu-miR-6388	0	NA	NA	NA	NA	NA	0	0	0	0	0	0	0	0	0	0	0
chr13:17747525-17747544	MIMAT0017325	mmu-miR-466i-5p	0	NA	NA	NA	NA	NA	0	0	0	0	0	0	0	0	0	0	0
chr13:17747552-17747573	MIMAT0005834	mmu-miR-466i-3p	0	NA	NA	NA	NA	NA	0	0	0	0	0	0	0	0	0	0	0
chr13:21396613-21396633	MIMAT0027784	mmu-miR-6942-5p	0.210879	0.788319	3.14975	0.25028	0.802371	NA	0	0	0	0	0	0	0	0	0	0	2.31967
chr13:21396579-21396600	MIMAT0027785	mmu-miR-6942-3p	0.186846	-1.40012	3.14284	-0.445496	0.655961	NA	0	2.05531	0	0	0	0	0	0	0	0	0
chr13:21445209-21445230	MIMAT0007873	mmu-miR-1896	0	NA	NA	NA	NA	NA	0	0	0	0	0	0	0	0	0	0	0
chr13:28710796-28710816	MIMAT0025112	mmu-miR-6368	0	NA	NA	NA	NA	NA	0	0	0	0	0	0	0	0	0	0	0
chr13:40865801-40865820	MIMAT0020634	mmu-miR-5124a	0.176722	0.788319	3.14975	0.25028	0.802371	NA	0	0	0	0	0	0	0	0.721943	1.222	0	0
chr13:50544644-50544664	MIMAT0003461	mmu-miR-683	0	NA	NA	NA	NA	NA	0	0	0	0	0	0	0	0	0	0	0
chr13:50600990-50601010	MIMAT0003461_1	mmu-miR-683	0	NA	NA	NA	NA	NA	0	0	0	0	0	0	0	0	0	0	0
chr13:54578152-54578173	MIMAT0048641	mmu-miR-1271-5p	0	NA	NA	NA	NA	NA	0	0	0	0	0	0	0	0	0	0	0
chr13:54578188-54578210	MIMAT0048642	mmu-miR-1271-3p	0	NA	NA	NA	NA	NA	0	0	0	0	0	0	0	0	0	0	0
chr13:55453111-55453130	MIMAT0027786	mmu-miR-6943-5p	0	NA	NA	NA	NA	NA	0	0	0	0	0	0	0	0	0	0	0
chr13:55453150-55453171	MIMAT0027787	mmu-miR-6943-3p	0.710467	0.126054	1.40921	0.0894504	0.928724	NA	0	1.02765	0	0	2.02903	0.859488	0	0.721943	1.222	0.795177	1.15983
chr13:55477754-55477776	MIMAT0027788	mmu-miR-6944-5p	0.0614859	-0.750537	3.14975	-0.238285	0.81166	NA	0	0	0	0	0.676345	0	0	0	0	0	0
chr13:55507667-55507688	MIMAT0027790	mmu-miR-6945-5p	0	NA	NA	NA	NA	NA	0	0	0	0	0	0	0	0	0	0	0
chr13:58313119-58313141	MIMAT0025113	mmu-miR-6369	0	NA	NA	NA	NA	NA	0	0	0	0	0	0	0	0	0	0	0
chr13:62760807-62760825	MIMAT0003504	mmu-miR-713	0	NA	NA	NA	NA	NA	0	0	0	0	0	0	0	0	0	0	0
chr13:63300492-63300512	MIMAT0016980	mmu-miR-23b-5p	0.568837	0.95964	1.58496	0.605467	0.544869	NA	0	0	0	0	1.35269	0.859488	0.941252	0.721943	1.222	0	1.15983
chr13:71107108-71107129	MIMAT0005844	mmu-miR-466f	0	NA	NA	NA	NA	NA	0	0	0	0	0	0	0	0	0	0	0
chr13:74407121-74407141	MIMAT0003471	mmu-miR-692	0	NA	NA	NA	NA	NA	0	0	0	0	0	0	0	0	0	0	0
chr13:75645119-75645139	MIMAT0003459	mmu-miR-682	0	NA	NA	NA	NA	NA	0	0	0	0	0	0	0	0	0	0	0
chr13:82698278-82698296	MIMAT0019338	mmu-miR-3961	0	NA	NA	NA	NA	NA	0	0	0	0	0	0	0	0	0	0	0
chr13:93790777-93790794	MIMAT0022377	mmu-miR-5624-5p	0.592468	-1.47283	1.78653	-0.824411	0.409706	NA	0	3.08296	0	0	1.35269	0.859488	0	0	1.222	0	0
chr13:93790816-93790837	MIMAT0022378	mmu-miR-5624-3p	0.469344	0.303204	2.17868	0.139168	0.889317	NA	0	2.05531	0	0	0	0	0	0.721943	0	2.38553	0
chr13:109903819-109903840	MIMAT0007874	mmu-miR-1904	0	NA	NA	NA	NA	NA	0	0	0	0	0	0	0	0	0	0	0
chr13:113036049-113036070	MIMAT0022715	mmu-miR-449c-3p	0	NA	NA	NA	NA	NA	0	0	0	0	0	0	0	0	0	0	0
chr13:113037429-113037448	MIMAT0005447	mmu-miR-449b	0	NA	NA	NA	NA	NA	0	0	0	0	0	0	0	0	0	0	0
chr13:113037589-113037610	MIMAT0017180	mmu-miR-449a-3p	0.16269	-0.269644	3.14975	-0.0856079	0.931778	NA	0	0	1.06765	0	0	0	0	0.721943	0	0	0
chr14:11282482-11282502	MIMAT0025136	mmu-miR-5124b	0	NA	NA	NA	NA	NA	0	0	0	0	0	0	0	0	0	0	0
chr14:20690640-20690660	MIMAT0027792	mmu-miR-6946-5p	0.0656312	0.307426	3.14975	0.0976031	0.922247	NA	0	0	0	0	0	0	0	0.721943	0	0	0
chr14:24088877-24088899	MIMAT0028388	mmu-miR-7210-5p	0	NA	NA	NA	NA	NA	0	0	0	0	0	0	0	0	0	0	0
chr14:24088907-24088930	MIMAT0028389	mmu-miR-7210-3p	0	NA	NA	NA	NA	NA	0	0	0	0	0	0	0	0	0	0	0
chr14:25534451-25534471	MIMAT0014858	mmu-miR-3075-5p	0.206064	0.21125	3.08707	0.0684307	0.945443	NA	0	0	0	0	0.676345	0	0	0	0	1.59035	0
chr14:25534491-25534511	MIMAT0014859	mmu-miR-3075-3p	0	NA	NA	NA	NA	NA	0	0	0	0	0	0	0	0	0	0	0
chr14:26669587-26669608	MIMAT0029850	mmu-miR-7672-5p	0	NA	NA	NA	NA	NA	0	0	0	0	0	0	0	0	0	0	0
chr14:26669547-26669567	MIMAT0029851	mmu-miR-7672-3p	0.0934232	-0.750537	3.14975	-0.238285	0.81166	NA	0	1.02765	0	0	0	0	0	0	0	0	0
chr14:29988893-29988913	MIMAT0027794	mmu-miR-6947-5p	0.176722	0.788319	3.14975	0.25028	0.802371	NA	0	0	0	0	0	0	0	0.721943	1.222	0	0
chr14:29988930-29988951	MIMAT0027795	mmu-miR-6947-3p	0.0781353	0.307426	3.14975	0.0976031	0.922247	NA	0	0	0	0	0	0.859488	0	0	0	0	0
chr14:30572150-30572173	MIMAT0014860	mmu-miR-3076-5p	0.633247	0.823099	1.47668	0.557399	0.577255	NA	0	1.02765	0	1.17962	0	0.859488	0	0.721943	1.222	0.795177	1.15983
chr14:34894662-34894683	MIMAT0017039	mmu-miR-346-3p	0.588453	-1.56538	1.80362	-0.867913	0.385442	NA	0	0	0	3.53886	1.35269	0.859488	0	0.721943	0	0	0
chr14:44947483-44947501	MIMAT0004867	mmu-miR-327	0	NA	NA	NA	NA	NA	0	0	0	0	0	0	0	0	0	0	0
chr14:45657972-45657994	MIMAT0020642	mmu-miR-5131	0.111091	0.307426	3.14975	0.0976031	0.922247	NA	0	0	0	0	0	0	0	0	1.222	0	0
chr14:54616746-54616767	MIMAT0003464	mmu-miR-686	0	NA	NA	NA	NA	NA	0	0	0	0	0	0	0	0	0	0	0
chr14:54975745-54975766	MIMAT0017280	mmu-miR-208b-5p	0	NA	NA	NA	NA	NA	0	0	0	0	0	0	0	0	0	0	0
chr14:56082441-56082463	MIMAT0027798	mmu-miR-6949-5p	0	NA	NA	NA	NA	NA	0	0	0	0	0	0	0	0	0	0	0
chr14:56082401-56082421	MIMAT0027799	mmu-miR-6949-3p	0	NA	NA	NA	NA	NA	0	0	0	0	0	0	0	0	0	0	0
chr14:57798424-57798448	MIMAT0014862	mmu-miR-3077-5p	0.0781353	0.307426	3.14975	0.0976031	0.922247	NA	0	0	0	0	0	0.859488	0	0	0	0	0
chr14:60228873-60228894	MIMAT0003465	mmu-miR-719	0	NA	NA	NA	NA	NA	0	0	0	0	0	0	0	0	0	0	0
chr14:62837797-62837817	MIMAT0031400	mmu-miR-8098	0.224176	-0.805764	2.5512	-0.315838	0.752126	NA	0	0	1.06765	0	0.676345	0	0	0.721943	0	0	0
chr14:62865610-62865630	MIMAT0025588	mmu-miR-6541	0	NA	NA	NA	NA	NA	0	0	0	0	0	0	0	0	0	0	0
chr14:63150324-63150348	MIMAT0049837	mmu-miR-12185-5p	0	NA	NA	NA	NA	NA	0	0	0	0	0	0	0	0	0	0	0
chr14:64591239-64591258	MIMAT0014865	mmu-miR-3078-3p	0.339027	0.154348	2.07905	0.0742397	0.94082	NA	0	0	0	0	1.35269	0.859488	0	0.721943	0	0.795177	0
chr14:67859699-67859722	MIMAT0025584	mmu-miR-6539	0.345317	-0.425865	2.31207	-0.184192	0.853863	NA	0	0	2.13529	0	0	0	0.941252	0.721943	0	0	0
chr14:69692253-69692275	MIMAT0027800	mmu-miR-6950-5p	0	NA	NA	NA	NA	NA	0	0	0	0	0	0	0	0	0	0	0
chr14:69692293-69692313	MIMAT0027801	mmu-miR-6950-3p	0	NA	NA	NA	NA	NA	0	0	0	0	0	0	0	0	0	0	0
chr14:73206808-73206829	MIMAT0003466	mmu-miR-687	0	NA	NA	NA	NA	NA	0	0	0	0	0	0	0	0	0	0	0
chr14:78191451-78191468	MIMAT0009446	mmu-miR-1971	0	NA	NA	NA	NA	NA	0	0	0	0	0	0	0	0	0	0	0
chr14:79738460-79738481	MIMAT0003897	mmu-miR-759	0	NA	NA	NA	NA	NA	0	0	0	0	0	0	0	0	0	0	0
chr14:102982608-102982631	MIMAT0020641	mmu-miR-5130	0	NA	NA	NA	NA	NA	0	0	0	0	0	0	0	0	0	0	0
chr14:105623710-105623730	MIMAT0025139	mmu-miR-6390	0.0614859	-0.750537	3.14975	-0.238285	0.81166	NA	0	0	0	0	0.676345	0	0	0	0	0	0
chr14:115044012-115044033	MIMAT0004660	mmu-miR-19a-5p	0.216866	1.20806	3.14339	0.384317	0.700744	NA	0	0	0	0	0	0	0	0	0	2.38553	0
chr14:115044320-115044342	MIMAT0017065	mmu-miR-19b-1-5p	0	NA	NA	NA	NA	NA	0	0	0	0	0	0	0	0	0	0	0
chr14:118258659-118258677	MIMAT0024862	mmu-miR-6241	0	NA	NA	NA	NA	NA	0	0	0	0	0	0	0	0	0	0	0
chr14:118592376-118592396	MIMAT0025140	mmu-miR-6391	0	NA	NA	NA	NA	NA	0	0	0	0	0	0	0	0	0	0	0
chr15:12171502-12171523	MIMAT0007875	mmu-miR-1898	0	NA	NA	NA	NA	NA	0	0	0	0	0	0	0	0	0	0	0
chr15:25948227-25948247	MIMAT0028392	mmu-miR-7212-5p	0	NA	NA	NA	NA	NA	0	0	0	0	0	0	0	0	0	0	0
chr15:25948267-25948287	MIMAT0028393	mmu-miR-7212-3p	0	NA	NA	NA	NA	NA	0	0	0	0	0	0	0	0	0	0	0
chr15:27571499-27571520	MIMAT0028131	mmu-miR-7117-5p	0.504092	-1.90197	1.84841	-1.02898	0.303489	NA	2.94154	0	1.06765	0	0.676345	0.859488	0	0	0	0	0
chr15:29713337-29713356	MIMAT0019344	mmu-miR-3964	0.455745	1.25203	1.94757	0.642866	0.520311	NA	0	0	0	0	0.676345	0	0	0	1.222	0.795177	2.31967
chr15:35660846-35660864	MIMAT0012772	mmu-miR-599	0	NA	NA	NA	NA	NA	0	0	0	0	0	0	0	0	0	0	0
chr15:35661016-35661037	MIMAT0004937	mmu-miR-875-5p	0	NA	NA	NA	NA	NA	0	0	0	0	0	0	0	0	0	0	0
chr15:35660982-35661002	MIMAT0004938	mmu-miR-875-3p	0	NA	NA	NA	NA	NA	0	0	0	0	0	0	0	0	0	0	0
chr15:36240113-36240134	MIMAT0031399	mmu-miR-8097	0.133706	-0.750537	3.14975	-0.238285	0.81166	NA	1.47077	0	0	0	0	0	0	0	0	0	0
chr15:38490473-38490493	MIMAT0027803	mmu-miR-6951-3p	0.133706	-0.750537	3.14975	-0.238285	0.81166	NA	1.47077	0	0	0	0	0	0	0	0	0	0
chr15:50889035-50889056	MIMAT0007876	mmu-miR-1907	0	NA	NA	NA	NA	NA	0	0	0	0	0	0	0	0	0	0	0
chr15:53614216-53614235	MIMAT0019339	mmu-miR-28c	0.639569	0.147609	1.56876	0.0940925	0.925036	NA	0	1.02765	1.06765	0	0.676345	0	0	0.721943	1.222	0	2.31967
chr15:76064862-76064883	MIMAT0027804	mmu-miR-6952-5p	0.494003	1.14517	1.73504	0.660021	0.50924	NA	1.47077	0	0	0	0	0.859488	0	0.721943	1.222	0	1.15983
chr15:76215621-76215641	MIMAT0009407	mmu-miR-1942	0	NA	NA	NA	NA	NA	0	0	0	0	0	0	0	0	0	0	0
chr15:76248196-76248221	MIMAT0027806	mmu-miR-6953-5p	0	NA	NA	NA	NA	NA	0	0	0	0	0	0	0	0	0	0	0
chr15:76290932-76290954	MIMAT0014866	mmu-miR-3079-5p	0	NA	NA	NA	NA	NA	0	0	0	0	0	0	0	0	0	0	0
chr15:76290891-76290911	MIMAT0014867	mmu-miR-3079-3p	0.0970587	-0.750537	3.14975	-0.238285	0.81166	NA	0	0	1.06765	0	0	0	0	0	0	0	0
chr15:76433219-76433240	MIMAT0027808	mmu-miR-6954-5p	0	NA	NA	NA	NA	NA	0	0	0	0	0	0	0	0	0	0	0
chr15:76433253-76433273	MIMAT0027809	mmu-miR-6954-3p	0.614687	0.748627	1.66467	0.449715	0.652916	NA	0	0	0	2.35924	0	0	0.941252	1.44389	1.222	0.795177	0
chr15:78284827-78284849	MIMAT0029860	mmu-miR-7676-5p	0	NA	NA	NA	NA	NA	0	0	0	0	0	0	0	0	0	0	0
chr15:78284788-78284809	MIMAT0029861	mmu-miR-7676-3p	0	NA	NA	NA	NA	NA	0	0	0	0	0	0	0	0	0	0	0
chr15:78348599-78348621	MIMAT0029860_1	mmu-miR-7676-5p	0	NA	NA	NA	NA	NA	0	0	0	0	0	0	0	0	0	0	0
chr15:78348639-78348660	MIMAT0029861_1	mmu-miR-7676-3p	0	NA	NA	NA	NA	NA	0	0	0	0	0	0	0	0	0	0	0
chr15:78891891-78891912	MIMAT0027811	mmu-miR-6955-3p	0.643854	-0.666921	1.68272	-0.396335	0.691858	NA	0	3.08296	0	0	0.676345	0	0.941252	0	1.222	0	1.15983
chr15:79002231-79002250	MIMAT0027812	mmu-miR-6956-5p	0	NA	NA	NA	NA	NA	0	0	0	0	0	0	0	0	0	0	0
chr15:79375236-79375256	MIMAT0017342	mmu-miR-1943-3p	0.544999	0.520294	1.72791	0.301112	0.763329	NA	0	1.02765	1.06765	0	0	0	1.8825	0	1.222	0.795177	0
chr15:79999007-79999026	MIMAT0028394	mmu-miR-7213-5p	0.44396	-0.00158564	1.96195	-0.000808194	0.999355	NA	1.47077	1.02765	0	0	0	0	0.941252	1.44389	0	0	0
chr15:79998970-79998989	MIMAT0028395	mmu-miR-7213-3p	0.495009	1.16142	1.89577	0.612635	0.540117	NA	1.47077	0	0	0	0	0.859488	0	0	0	0.795177	2.31967
chr15:80646078-80646098	MIMAT0027814	mmu-miR-6957-5p	0	NA	NA	NA	NA	NA	0	0	0	0	0	0	0	0	0	0	0
chr15:80646113-80646134	MIMAT0027815	mmu-miR-6957-3p	0	NA	NA	NA	NA	NA	0	0	0	0	0	0	0	0	0	0	0
chr15:82393958-82393978	MIMAT0029890	mmu-miR-7684-5p	0	NA	NA	NA	NA	NA	0	0	0	0	0	0	0	0	0	0	0
chr15:82393919-82393940	MIMAT0029891	mmu-miR-7684-3p	0	NA	NA	NA	NA	NA	0	0	0	0	0	0	0	0	0	0	0
chr15:82959266-82959285	MIMAT0014868	mmu-miR-3080-5p	0.424951	-1.72006	2.16696	-0.793764	0.427333	NA	0	0	3.20294	0	0.676345	0	0	0	0	0.795177	0
chr15:82959228-82959249	MIMAT0014869	mmu-miR-3080-3p	0.681867	0.472838	1.61032	0.29363	0.76904	NA	0	0	2.13529	0	0.676345	0.859488	0	1.44389	0	2.38553	0
chr15:83341838-83341858	MIMAT0049839	mmu-miR-12186-5p	0	NA	NA	NA	NA	NA	0	0	0	0	0	0	0	0	0	0	0
chr15:83341804-83341824	MIMAT0049840	mmu-miR-12186-3p	0	NA	NA	NA	NA	NA	0	0	0	0	0	0	0	0	0	0	0
chr15:83362939-83362959	MIMAT0049839_1	mmu-miR-12186-5p	0	NA	NA	NA	NA	NA	0	0	0	0	0	0	0	0	0	0	0
chr15:83362905-83362925	MIMAT0049840_1	mmu-miR-12186-3p	0	NA	NA	NA	NA	NA	0	0	0	0	0	0	0	0	0	0	0
chr15:84168285-84168307	MIMAT0025141	mmu-miR-6392-5p	0.512242	-0.360108	1.74073	-0.206872	0.836109	NA	0	0	2.13529	0	0.676345	0	0.941252	0.721943	0	0	1.15983
chr15:84168334-84168356	MIMAT0025142	mmu-miR-6392-3p	0	NA	NA	NA	NA	NA	0	0	0	0	0	0	0	0	0	0	0
chr15:84951579-84951603	MIMAT0014804	mmu-miR-1249-5p	0.210209	1.18247	3.05959	0.386481	0.69914	NA	0	0	0	0	0	0	0	0.721943	0	1.59035	0
chr15:87795919-87795940	MIMAT0025143	mmu-miR-6393	0	NA	NA	NA	NA	NA	0	0	0	0	0	0	0	0	0	0	0
chr15:89162882-89162903	MIMAT0028133	mmu-miR-7118-5p	0	NA	NA	NA	NA	NA	0	0	0	0	0	0	0	0	0	0	0
chr15:89162849-89162870	MIMAT0028134	mmu-miR-7118-3p	0.218329	-0.269643	2.98526	-0.0903247	0.928029	NA	0	0	0	1.17962	0	0	0	0	1.222	0	0
chr15:89185516-89185537	MIMAT0027816	mmu-miR-6958-5p	0	NA	NA	NA	NA	NA	0	0	0	0	0	0	0	0	0	0	0
chr15:89305705-89305727	MIMAT0027818	mmu-miR-6959-5p	0.300318	1.36147	2.76262	0.492818	0.622141	NA	0	0	0	0	0	0.859488	0	0	2.44401	0	0
chr15:90224360-90224379	MIMAT0029798	mmu-miR-7648-5p	0.414723	1.03855	1.95138	0.532214	0.594578	NA	0	1.02765	0	0	0	0	0	0.721943	1.222	1.59035	0
chr15:90224392-90224412	MIMAT0029799	mmu-miR-7648-3p	0.111091	0.307426	3.14975	0.0976031	0.922247	NA	0	0	0	0	0	0	0	0	1.222	0	0
chr15:99080810-99080831	MIMAT0027820	mmu-miR-6960-5p	0.262291	1.27488	2.44124	0.522226	0.601513	NA	0	0	0	0	0	0	0.941252	0.721943	1.222	0	0
chr15:99080844-99080865	MIMAT0027821	mmu-miR-6960-3p	0	NA	NA	NA	NA	NA	0	0	0	0	0	0	0	0	0	0	0
chr15:100649205-100649224	MIMAT0027822	mmu-miR-6961-5p	0	NA	NA	NA	NA	NA	0	0	0	0	0	0	0	0	0	0	0
chr15:100649163-100649184	MIMAT0027823	mmu-miR-6961-3p	0	NA	NA	NA	NA	NA	0	0	0	0	0	0	0	0	0	0	0
chr15:101193874-101193893	MIMAT0027824	mmu-miR-6962-5p	0.0656312	0.307426	3.14975	0.0976031	0.922247	NA	0	0	0	0	0	0	0	0.721943	0	0	0
chr15:102328648-102328669	MIMAT0049841	mmu-miR-12187-5p	0	NA	NA	NA	NA	NA	0	0	0	0	0	0	0	0	0	0	0
chr15:102328689-102328709	MIMAT0049842	mmu-miR-12187-3p	0.623843	0.820515	1.5584	0.52651	0.598534	NA	0	1.02765	1.06765	0	0	0	0.941252	1.44389	1.222	0	1.15983
chr15:102671802-102671821	MIMAT0003467	mmu-miR-688	0.267549	-0.256986	2.88013	-0.0892271	0.928901	NA	0	0	0	0	1.35269	0	0	0	0	1.59035	0
chr15:102973365-102973386	MIMAT0000518_1	mmu-miR-196a-5p	0	NA	NA	NA	NA	NA	0	0	0	0	0	0	0	0	0	0	0
chr15:102973401-102973422	MIMAT0004618	mmu-miR-196a-2-3p	0	NA	NA	NA	NA	NA	0	0	0	0	0	0	0	0	0	0	0
chr15:103014926-103014947	MIMAT0004837	mmu-miR-615-5p	0	NA	NA	NA	NA	NA	0	0	0	0	0	0	0	0	0	0	0
chr15:103014969-103014990	MIMAT0003783	mmu-miR-615-3p	0.133706	-0.750537	3.14975	-0.238285	0.81166	NA	1.47077	0	0	0	0	0	0	0	0	0	0
chr15:103350497-103350520	MIMAT0027826	mmu-miR-6963-5p	0	NA	NA	NA	NA	NA	0	0	0	0	0	0	0	0	0	0	0
chr15:103350455-103350477	MIMAT0027827	mmu-miR-6963-3p	0.27605	-0.908973	2.41223	-0.376819	0.706308	NA	0	1.02765	1.06765	0	0	0	0.941252	0	0	0	0
chr16:5215790-5215811	MIMAT0025108	mmu-miR-6364	0	NA	NA	NA	NA	NA	0	0	0	0	0	0	0	0	0	0	0
chr16:13453855-13453877	MIMAT0017077	mmu-miR-365-1-5p	0.0855684	0.307426	3.14975	0.0976031	0.922247	NA	0	0	0	0	0	0	0.941252	0	0	0	0
chr16:13471103-13471124	MIMAT0025109	mmu-miR-6365	0	NA	NA	NA	NA	NA	0	0	0	0	0	0	0	0	0	0	0
chr16:17124456-17124477	MIMAT0017232	mmu-miR-301b-5p	0.297478	0.697239	2.11518	0.329637	0.741675	NA	0	0	0	0	0.676345	0.859488	0.941252	0	0	0.795177	0
chr16:18165093-18165114	MIMAT0025110	mmu-miR-6366	0	NA	NA	NA	NA	NA	0	0	0	0	0	0	0	0	0	0	0
chr16:18284602-18284623	MIMAT0035716	mmu-miR-3618-5p	0	NA	NA	NA	NA	NA	0	0	0	0	0	0	0	0	0	0	0
chr16:18284562-18284583	MIMAT0035717	mmu-miR-3618-3p	0	NA	NA	NA	NA	NA	0	0	0	0	0	0	0	0	0	0	0
chr16:21256047-21256066	MIMAT0029874	mmu-miR-7680-5p	0	NA	NA	NA	NA	NA	0	0	0	0	0	0	0	0	0	0	0
chr16:21256013-21256034	MIMAT0029875	mmu-miR-7680-3p	0	NA	NA	NA	NA	NA	0	0	0	0	0	0	0	0	0	0	0
chr16:22532128-22532149	MIMAT0031396	mmu-miR-8095	0	NA	NA	NA	NA	NA	0	0	0	0	0	0	0	0	0	0	0
chr16:22605342-22605363	MIMAT0025106	mmu-miR-6362	0	NA	NA	NA	NA	NA	0	0	0	0	0	0	0	0	0	0	0
chr16:28599940-28599961	MIMAT0003469	mmu-miR-690	0	NA	NA	NA	NA	NA	0	0	0	0	0	0	0	0	0	0	0
chr16:32267540-32267566	MIMAT0009412	mmu-miR-1946a	0	NA	NA	NA	NA	NA	0	0	0	0	0	0	0	0	0	0	0
chr16:33105411-33105432	MIMAT0017343	mmu-miR-1947-3p	0	NA	NA	NA	NA	NA	0	0	0	0	0	0	0	0	0	0	0
chr16:43640665-43640684	MIMAT0004892	mmu-miR-568	0	NA	NA	NA	NA	NA	0	0	0	0	0	0	0	0	0	0	0
chr16:44013885-44013905	MIMAT0015641	mmu-miR-3470b	0	NA	NA	NA	NA	NA	0	0	0	0	0	0	0	0	0	0	0
chr16:44558092-44558114	MIMAT0014870	mmu-miR-3081-5p	0.105439	0.307426	3.14975	0.0976031	0.922247	NA	0	0	0	0	0	0	0	0	0	0	1.15983
chr16:50727204-50727225	MIMAT0025107	mmu-miR-6363	0	NA	NA	NA	NA	NA	0	0	0	0	0	0	0	0	0	0	0
chr16:55494770-55494788	MIMAT0020626	mmu-miR-5118	0	NA	NA	NA	NA	NA	0	0	0	0	0	0	0	0	0	0	0
chr16:57610786-57610809	MIMAT0049843	mmu-miR-1970b-5p	0	NA	NA	NA	NA	NA	0	0	0	0	0	0	0	0	0	0	0
chr16:74342005-74342026	MIMAT0003470	mmu-miR-691	0	NA	NA	NA	NA	NA	0	0	0	0	0	0	0	0	0	0	0
chr16:84714182-84714202	MIMAT0016993	mmu-miR-155-3p	0	NA	NA	NA	NA	NA	0	0	0	0	0	0	0	0	0	0	0
chr16:91527468-91527489	MIMAT0025111	mmu-miR-6367	0	NA	NA	NA	NA	NA	0	0	0	0	0	0	0	0	0	0	0
chr16:97877266-97877286	MIMAT0027828	mmu-miR-6964-5p	0.0855684	0.307426	3.14975	0.0976031	0.922247	NA	0	0	0	0	0	0	0.941252	0	0	0	0
chr17:6895259-6895279	MIMAT0003471_1	mmu-miR-692	0	NA	NA	NA	NA	NA	0	0	0	0	0	0	0	0	0	0	0
chr17:23823339-23823358	MIMAT0020635	mmu-miR-5125	0.232557	0.211254	2.53162	0.0834462	0.933497	NA	0	0	0	0	0.676345	0	0	0.721943	0	0	1.15983
chr17:24234575-24234595	MIMAT0020645	mmu-miR-5134-5p	0.0934232	-0.750537	3.14975	-0.238285	0.81166	NA	0	1.02765	0	0	0	0	0	0	0	0	0
chr17:24234535-24234556	MIMAT0022989	mmu-miR-5134-3p	0.163704	0.788319	3.14975	0.25028	0.802371	NA	0	0	0	0	0	0.859488	0.941252	0	0	0	0
chr17:24240919-24240942	MIMAT0027830	mmu-miR-6965-5p	0	NA	NA	NA	NA	NA	0	0	0	0	0	0	0	0	0	0	0
chr17:24240884-24240905	MIMAT0027831	mmu-miR-6965-3p	0.240477	-0.806084	2.50047	-0.322374	0.74717	NA	0	1.02765	0	0	0.676345	0	0.941252	0	0	0	0
chr17:25160503-25160526	MIMAT0049844	mmu-miR-12188-5p	0.212678	-0.269643	3.01115	-0.0895482	0.928646	NA	0	0	0	1.17962	0	0	0	0	0	0	1.15983
chr17:25160550-25160576	MIMAT0049845	mmu-miR-12188-3p	0	NA	NA	NA	NA	NA	0	0	0	0	0	0	0	0	0	0	0
chr17:25245614-25245638	MIMAT0027832	mmu-miR-3547-5p	0.218329	-0.269643	2.98526	-0.0903247	0.928029	NA	0	0	0	1.17962	0	0	0	0	1.222	0	0
chr17:25780813-25780833	MIMAT0027834	mmu-miR-6966-5p	0.107238	-0.750537	3.14975	-0.238285	0.81166	NA	0	0	0	1.17962	0	0	0	0	0	0	0
chr17:25831406-25831427	MIMAT0014872	mmu-miR-3082-5p	0.105439	0.307426	3.14975	0.0976031	0.922247	NA	0	0	0	0	0	0	0	0	0	0	1.15983
chr17:26920967-26920987	MIMAT0027836	mmu-miR-6967-5p	0.0614859	-0.750537	3.14975	-0.238285	0.81166	NA	0	0	0	0	0.676345	0	0	0	0	0	0
chr17:26921000-26921019	MIMAT0027837	mmu-miR-6967-3p	0.354098	-1.37927	2.26552	-0.60881	0.54265	NA	0	0	0	2.35924	0.676345	0.859488	0	0	0	0	0
chr17:26935472-26935493	MIMAT0027838	mmu-miR-6968-5p	0	NA	NA	NA	NA	NA	0	0	0	0	0	0	0	0	0	0	0
chr17:27091245-27091269	MIMAT0029868	mmu-miR-7677-5p	0	NA	NA	NA	NA	NA	0	0	0	0	0	0	0	0	0	0	0
chr17:27091289-27091311	MIMAT0029869	mmu-miR-7677-3p	0.177728	0.788319	3.14975	0.25028	0.802371	NA	0	0	0	0	0	0	0	0	0	0.795177	1.15983
chr17:27317073-27317095	MIMAT0028396	mmu-miR-7214-5p	0	NA	NA	NA	NA	NA	0	0	0	0	0	0	0	0	0	0	0
chr17:27317035-27317058	MIMAT0028397	mmu-miR-7214-3p	0	NA	NA	NA	NA	NA	0	0	0	0	0	0	0	0	0	0	0
chr17:27328385-27328408	MIMAT0028400	mmu-miR-7216-5p	0	NA	NA	NA	NA	NA	0	0	0	0	0	0	0	0	0	0	0
chr17:27328440-27328460	MIMAT0028401	mmu-miR-7216-3p	0	NA	NA	NA	NA	NA	0	0	0	0	0	0	0	0	0	0	0
chr17:27355738-27355762	MIMAT0028402	mmu-miR-7217-5p	0	NA	NA	NA	NA	NA	0	0	0	0	0	0	0	0	0	0	0
chr17:27355778-27355799	MIMAT0028403	mmu-miR-7217-3p	0	NA	NA	NA	NA	NA	0	0	0	0	0	0	0	0	0	0	0
chr17:27358097-27358117	MIMAT0028404	mmu-miR-7218-5p	0	NA	NA	NA	NA	NA	0	0	0	0	0	0	0	0	0	0	0
chr17:27358132-27358155	MIMAT0028405	mmu-miR-7218-3p	0	NA	NA	NA	NA	NA	0	0	0	0	0	0	0	0	0	0	0
chr17:28558475-28558496	MIMAT0027840	mmu-miR-6969-5p	0	NA	NA	NA	NA	NA	0	0	0	0	0	0	0	0	0	0	0
chr17:28558441-28558460	MIMAT0027841	mmu-miR-6969-3p	0	NA	NA	NA	NA	NA	0	0	0	0	0	0	0	0	0	0	0
chr17:29595538-29595559	MIMAT0029840	mmu-miR-7667-5p	0	NA	NA	NA	NA	NA	0	0	0	0	0	0	0	0	0	0	0
chr17:29595579-29595600	MIMAT0029841	mmu-miR-7667-3p	0	NA	NA	NA	NA	NA	0	0	0	0	0	0	0	0	0	0	0
chr17:33886708-33886728	MIMAT0027836_1	mmu-miR-6967-5p	0	NA	NA	NA	NA	NA	0	0	0	0	0	0	0	0	0	0	0
chr17:33886676-33886695	MIMAT0027837_1	mmu-miR-6967-3p	0.25128	0.211255	2.476	0.0853208	0.932006	NA	0	1.02765	0	0	0	0	0.941252	0	0	0.795177	0
chr17:34841847-34841866	MIMAT0027844	mmu-miR-6971-5p	0	NA	NA	NA	NA	NA	0	0	0	0	0	0	0	0	0	0	0
chr17:34857605-34857627	MIMAT0027846	mmu-miR-6972-5p	0	NA	NA	NA	NA	NA	0	0	0	0	0	0	0	0	0	0	0
chr17:34857569-34857589	MIMAT0027847	mmu-miR-6972-3p	0	NA	NA	NA	NA	NA	0	0	0	0	0	0	0	0	0	0	0
chr17:35194977-35194998	MIMAT0027848	mmu-miR-6973a-5p	0	NA	NA	NA	NA	NA	0	0	0	0	0	0	0	0	0	0	0
chr17:35195024-35195045	MIMAT0027849	mmu-miR-6973a-3p	0	NA	NA	NA	NA	NA	0	0	0	0	0	0	0	0	0	0	0
chr17:35204534-35204557	MIMAT0027850	mmu-miR-6974-5p	0	NA	NA	NA	NA	NA	0	0	0	0	0	0	0	0	0	0	0
chr17:35204475-35204496	MIMAT0027851	mmu-miR-6974-3p	0	NA	NA	NA	NA	NA	0	0	0	0	0	0	0	0	0	0	0
chr17:35244080-35244102	MIMAT0027852	mmu-miR-6975-5p	0	NA	NA	NA	NA	NA	0	0	0	0	0	0	0	0	0	0	0
chr17:35251314-35251334	MIMAT0031395	mmu-miR-8094	0.205995	-0.269643	3.04306	-0.0886093	0.929392	NA	1.47077	0	0	0	0	0	0	0	0	0.795177	0
chr17:35917899-35917920	MIMAT0007877	mmu-miR-1894-5p	0	NA	NA	NA	NA	NA	0	0	0	0	0	0	0	0	0	0	0
chr17:35917938-35917959	MIMAT0007878	mmu-miR-1894-3p	0	NA	NA	NA	NA	NA	0	0	0	0	0	0	0	0	0	0	0
chr17:46231551-46231571	MIMAT0003472	mmu-miR-693-5p	0	NA	NA	NA	NA	NA	0	0	0	0	0	0	0	0	0	0	0
chr17:46231581-46231603	MIMAT0004189	mmu-miR-693-3p	0.619612	1.6966	1.8046	0.940151	0.34714	NA	0	0	0	1.17962	0	0	2.82376	0	1.222	1.59035	0
chr17:46553862-46553884	MIMAT0027854	mmu-miR-6976-5p	0.267412	-1.40012	3.14284	-0.445496	0.655961	NA	2.94154	0	0	0	0	0	0	0	0	0	0
chr17:56418885-56418909	MIMAT0027856	mmu-miR-6977-5p	0.139621	-0.269644	3.14975	-0.0856079	0.931778	NA	0	0	0	0	0.676345	0.859488	0	0	0	0	0
chr17:57217201-57217223	MIMAT0027858	mmu-miR-6978-5p	0	NA	NA	NA	NA	NA	0	0	0	0	0	0	0	0	0	0	0
chr17:57217172-57217194	MIMAT0027859	mmu-miR-6978-3p	0	NA	NA	NA	NA	NA	0	0	0	0	0	0	0	0	0	0	0
chr17:64440863-64440883	MIMAT0025176	mmu-miR-6420	0	NA	NA	NA	NA	NA	0	0	0	0	0	0	0	0	0	0	0
chr17:67026162-67026183	MIMAT0027104	mmu-miR-5709-3p	0.0855684	0.307426	3.14975	0.0976031	0.922247	NA	0	0	0	0	0	0	0.941252	0	0	0	0
chr17:70860558-70860580	MIMAT0005856	mmu-miR-1195	0	NA	NA	NA	NA	NA	0	0	0	0	0	0	0	0	0	0	0
chr17:87220142-87220159	MIMAT0049849	mmu-miR-12190-3p	0	NA	NA	NA	NA	NA	0	0	0	0	0	0	0	0	0	0	0
chr18:6490574-6490595	MIMAT0007879	mmu-miR-1893	0.105439	0.307426	3.14975	0.0976031	0.922247	NA	0	0	0	0	0	0	0	0	0	0	1.15983
chr18:10782950-10782970	MIMAT0003473	mmu-miR-133a-5p	0.259749	-0.916316	2.87088	-0.319176	0.749593	NA	0	0	2.13529	0	0	0	0	0.721943	0	0	0
chr18:11840371-11840392	MIMAT0007880	mmu-miR-1901	0	NA	NA	NA	NA	NA	0	0	0	0	0	0	0	0	0	0	0
chr18:23774938-23774959	MIMAT0025103	mmu-miR-6360	0	NA	NA	NA	NA	NA	0	0	0	0	0	0	0	0	0	0	0
chr18:32880574-32880596	MIMAT0025104	mmu-miR-6361	0	NA	NA	NA	NA	NA	0	0	0	0	0	0	0	0	0	0	0
chr18:34759533-34759552	MIMAT0049850	mmu-miR-12191-5p	0	NA	NA	NA	NA	NA	0	0	0	0	0	0	0	0	0	0	0
chr18:37854641-37854660	MIMAT0027860	mmu-miR-6979-5p	0	NA	NA	NA	NA	NA	0	0	0	0	0	0	0	0	0	0	0
chr18:37974592-37974617	MIMAT0027864	mmu-miR-6981-5p	0	NA	NA	NA	NA	NA	0	0	0	0	0	0	0	0	0	0	0
chr18:37974503-37974524	MIMAT0027865	mmu-miR-6981-3p	0	NA	NA	NA	NA	NA	0	0	0	0	0	0	0	0	0	0	0
chr18:37990919-37990940	MIMAT0027862	mmu-miR-6980-5p	0	NA	NA	NA	NA	NA	0	0	0	0	0	0	0	0	0	0	0
chr18:37990887-37990906	MIMAT0027863	mmu-miR-6980-3p	0.107238	-0.750537	3.14975	-0.238285	0.81166	NA	0	0	0	1.17962	0	0	0	0	0	0	0
chr18:56538139-56538160	MIMAT0029904	mmu-miR-1258-5p	0.13792	0.788319	3.14975	0.25028	0.802371	NA	0	0	0	0	0	0	0	0.721943	0	0.795177	0
chr18:56538177-56538198	MIMAT0029905	mmu-miR-1258-3p	0.294471	1.32266	2.77285	0.477006	0.633358	NA	0	0	0	0	0	0	0	0	2.44401	0.795177	0
chr18:59579646-59579666	MIMAT0025098	mmu-miR-6355	0	NA	NA	NA	NA	NA	0	0	0	0	0	0	0	0	0	0	0
chr18:60812086-60812106	MIMAT0020615	mmu-miR-5107-5p	0	NA	NA	NA	NA	NA	0	0	0	0	0	0	0	0	0	0	0
chr18:60812130-60812151	MIMAT0022985	mmu-miR-5107-3p	0	NA	NA	NA	NA	NA	0	0	0	0	0	0	0	0	0	0	0
chr18:60953910-60953932	MIMAT0028409	mmu-miR-7220-3p	0.432326	-0.835739	1.94692	-0.429263	0.667732	NA	0	0	2.13529	0	0.676345	0	0	0.721943	1.222	0	0
chr18:60958078-60958102	MIMAT0027866	mmu-miR-6982-5p	0.230765	-1.39808	2.9448	-0.474764	0.634956	NA	1.47077	0	1.06765	0	0	0	0	0	0	0	0
chr18:61117473-61117494	MIMAT0027868	mmu-miR-6983-5p	0.0614859	-0.750537	3.14975	-0.238285	0.81166	NA	0	0	0	0	0.676345	0	0	0	0	0	0
chr18:61117509-61117531	MIMAT0027869	mmu-miR-6983-3p	0.501328	1.38627	2.15513	0.643244	0.520066	NA	0	1.02765	0	0	0	0	3.76501	0.721943	0	0	0
chr18:65248901-65248922	MIMAT0017005	mmu-miR-122-3p	0.150424	0.788319	3.14975	0.25028	0.802371	NA	0	0	0	0	0	0.859488	0	0	0	0.795177	0
chr18:65248900-65248921	MIMAT0049852	mmu-miR-122b-5p	0.150424	0.788319	3.14975	0.25028	0.802371	NA	0	0	0	0	0	0.859488	0	0	0	0.795177	0
chr18:66219276-66219294	MIMAT0003474	mmu-miR-694	0.322933	0.211255	2.30825	0.091522	0.927078	NA	1.47077	0	0	0	0	0.859488	0	0	1.222	0	0
chr18:68260951-68260973	MIMAT0028406	mmu-miR-7219-5p	0	NA	NA	NA	NA	NA	0	0	0	0	0	0	0	0	0	0	0
chr18:68260920-68260940	MIMAT0028407	mmu-miR-7219-3p	0.147054	-0.269644	3.14975	-0.0856079	0.931778	NA	0	0	0	0	0.676345	0	0.941252	0	0	0	0
chr18:68739401-68739421	MIMAT0025099	mmu-miR-6356	0	NA	NA	NA	NA	NA	0	0	0	0	0	0	0	0	0	0	0
chr18:69022237-69022257	MIMAT0025105	mmu-miR-145b	0	NA	NA	NA	NA	NA	0	0	0	0	0	0	0	0	0	0	0
chr18:70516862-70516884	MIMAT0025100	mmu-miR-6357	0	NA	NA	NA	NA	NA	0	0	0	0	0	0	0	0	0	0	0
chr18:76170554-76170576	MIMAT0025101	mmu-miR-6358	0	NA	NA	NA	NA	NA	0	0	0	0	0	0	0	0	0	0	0
chr18:81992020-81992038	MIMAT0020638	mmu-miR-5127	0	NA	NA	NA	NA	NA	0	0	0	0	0	0	0	0	0	0	0
chr18:82720291-82720309	MIMAT0020620	mmu-miR-5112	0	NA	NA	NA	NA	NA	0	0	0	0	0	0	0	0	0	0	0
chr18:88972087-88972107	MIMAT0025102	mmu-miR-6359	0	NA	NA	NA	NA	NA	0	0	0	0	0	0	0	0	0	0	0
chr19:3288925-3288948	MIMAT0027870	mmu-miR-6984-5p	0.163704	0.788319	3.14975	0.25028	0.802371	NA	0	0	0	0	0	0.859488	0.941252	0	0	0	0
chr19:3288961-3288981	MIMAT0027871	mmu-miR-6984-3p	0.406027	-0.835179	1.97516	-0.422841	0.672411	NA	0	0	2.13529	0	0.676345	0.859488	0	0	0	0.795177	0
chr19:3850796-3850816	MIMAT0049854	mmu-miR-12192-5p	0.525799	0.760082	1.58064	0.480869	0.63061	NA	0	0	1.06765	0	0.676345	0.859488	0.941252	1.44389	0	0.795177	0
chr19:4263852-4263873	MIMAT0027872	mmu-miR-6985-5p	0	NA	NA	NA	NA	NA	0	0	0	0	0	0	0	0	0	0	0
chr19:4623898-4623916	MIMAT0027875	mmu-miR-6986-3p	0	NA	NA	NA	NA	NA	0	0	0	0	0	0	0	0	0	0	0
chr19:5679050-5679071	MIMAT0027876	mmu-miR-6987-5p	0.0656312	0.307426	3.14975	0.0976031	0.922247	NA	0	0	0	0	0	0	0	0.721943	0	0	0
chr19:5679004-5679026	MIMAT0027877	mmu-miR-6987-3p	0.111091	0.307426	3.14975	0.0976031	0.922247	NA	0	0	0	0	0	0	0	0	1.222	0	0
chr19:6051338-6051358	MIMAT0027878	mmu-miR-6988-5p	0.0855684	0.307426	3.14975	0.0976031	0.922247	NA	0	0	0	0	0	0	0.941252	0	0	0	0
chr19:6134840-6134861	MIMAT0049855	mmu-miR-12193-5p	0.625395	-1.51808	2.01506	-0.75337	0.451228	NA	2.94154	2.05531	0	0	0	0	1.8825	0	0	0	0
chr19:6264900-6264921	MIMAT0017012	mmu-miR-192-3p	0.575418	-0.368774	1.71711	-0.214764	0.829951	NA	1.47077	0	1.06765	0	0.676345	0	0	0	0	0.795177	2.31967
chr19:6346485-6346506	MIMAT0027880	mmu-miR-6989-5p	0	NA	NA	NA	NA	NA	0	0	0	0	0	0	0	0	0	0	0
chr19:6829917-6829940	MIMAT0020540	mmu-miR-5046	0	NA	NA	NA	NA	NA	0	0	0	0	0	0	0	0	0	0	0
chr19:7422578-7422599	MIMAT0027884	mmu-miR-6991-5p	0.250712	0.211254	2.4776	0.0852657	0.93205	NA	0	0	0	0	0.676345	0.859488	0	0	1.222	0	0
chr19:7422621-7422642	MIMAT0027885	mmu-miR-6991-3p	0.16269	-0.269644	3.14975	-0.0856079	0.931778	NA	0	0	1.06765	0	0	0	0	0.721943	0	0	0
chr19:8742976-8742998	MIMAT0027886	mmu-miR-6992-5p	0	NA	NA	NA	NA	NA	0	0	0	0	0	0	0	0	0	0	0
chr19:8743058-8743079	MIMAT0027887	mmu-miR-6992-3p	0	NA	NA	NA	NA	NA	0	0	0	0	0	0	0	0	0	0	0
chr19:8888709-8888728	MIMAT0020647	mmu-miR-5136	0	NA	NA	NA	NA	NA	0	0	0	0	0	0	0	0	0	0	0
chr19:10191380-10191402	MIMAT0027888	mmu-miR-6993-5p	0.133706	-0.750537	3.14975	-0.238285	0.81166	NA	1.47077	0	0	0	0	0	0	0	0	0	0
chr19:10191419-10191439	MIMAT0027889	mmu-miR-6993-3p	0	NA	NA	NA	NA	NA	0	0	0	0	0	0	0	0	0	0	0
chr19:11923733-11923755	MIMAT0027890	mmu-miR-6994-5p	0.487472	0.525853	1.6314	0.322333	0.7472	NA	0	0	1.06765	0	0.676345	0	0.941252	0.721943	0	0.795177	1.15983
chr19:16314894-16314915	MIMAT0025158	mmu-miR-496b	0	NA	NA	NA	NA	NA	0	0	0	0	0	0	0	0	0	0	0
chr19:23149450-23149471	MIMAT0005850	mmu-miR-1192	0	NA	NA	NA	NA	NA	0	0	0	0	0	0	0	0	0	0	0
chr19:29135302-29135324	MIMAT0017046	mmu-miR-101b-5p	0.0722888	0.307426	3.14975	0.0976031	0.922247	NA	0	0	0	0	0	0	0	0	0	0.795177	0
chr19:33157122-33157141	MIMAT0019355	mmu-miR-3970	0.107238	-0.750537	3.14975	-0.238285	0.81166	NA	0	0	0	1.17962	0	0	0	0	0	0	0
chr19:34965402-34965423	MIMAT0009417	mmu-miR-1950	0	NA	NA	NA	NA	NA	0	0	0	0	0	0	0	0	0	0	0
chr19:40894754-40894774	MIMAT0031393	mmu-miR-8092	0	NA	NA	NA	NA	NA	0	0	0	0	0	0	0	0	0	0	0
chr19:41588691-41588712	MIMAT0031392	mmu-miR-8091	0	NA	NA	NA	NA	NA	0	0	0	0	0	0	0	0	0	0	0
chr19:42280131-42280155	MIMAT0014878	mmu-miR-3085-5p	0.456707	0.15011	1.77603	0.0845197	0.932643	NA	1.47077	0	0	0	0.676345	0.859488	0	0	1.222	0.795177	0
chr19:44808501-44808523	MIMAT0025157	mmu-miR-6405	0	NA	NA	NA	NA	NA	0	0	0	0	0	0	0	0	0	0	0
chr19:47273562-47273584	MIMAT0027892	mmu-miR-6995-5p	0.191008	0.78832	3.1203	0.252642	0.800545	NA	0	0	0	0	0	0	0.941252	0	0	0	1.15983
chr19:47273519-47273539	MIMAT0027893	mmu-miR-6995-3p	0.561972	0.839278	1.49252	0.562322	0.573897	NA	0	1.02765	0	0	0.676345	0.859488	0.941252	0.721943	0	0.795177	1.15983
chr19:47755062-47755081	MIMAT0031391	mmu-miR-8090	0	NA	NA	NA	NA	NA	0	0	0	0	0	0	0	0	0	0	0
chr19:53010679-53010701	MIMAT0025160	mmu-miR-6407	0	NA	NA	NA	NA	NA	0	0	0	0	0	0	0	0	0	0	0
chr19:55192678-55192700	MIMAT0029876	mmu-miR-6715-5p	0.324782	0.724858	2.07596	0.349168	0.726964	NA	0	0	0	0	0.676345	0	0.941252	0	0	0.795177	1.15983
chr19:55192714-55192734	MIMAT0029877	mmu-miR-6715-3p	0.0934232	-0.750537	3.14975	-0.238285	0.81166	NA	0	1.02765	0	0	0	0	0	0	0	0	0
chr19:58051167-58051190	MIMAT0022373	mmu-miR-5623-5p	0.0781353	0.307426	3.14975	0.0976031	0.922247	NA	0	0	0	0	0	0.859488	0	0	0	0	0
chr19:58051215-58051236	MIMAT0022374	mmu-miR-5623-3p	0.0614859	-0.750537	3.14975	-0.238285	0.81166	NA	0	0	0	0	0.676345	0	0	0	0	0	0
chr19:60774334-60774354	MIMAT0014877_1	mmu-miR-3084-3p	0	NA	NA	NA	NA	NA	0	0	0	0	0	0	0	0	0	0	0
chr2:10466677-10466699	MIMAT0014882	mmu-miR-466m-5p	0	NA	NA	NA	NA	NA	0	0	0	0	0	0	0	0	0	0	0
chr2:10466713-10466734	MIMAT0014883	mmu-miR-466m-3p	0	NA	NA	NA	NA	NA	0	0	0	0	0	0	0	0	0	0	0
chr2:10466954-10466975	MIMAT0004881	mmu-miR-466f-5p	0	NA	NA	NA	NA	NA	0	0	0	0	0	0	0	0	0	0	0
chr2:10466998-10467018	MIMAT0004882	mmu-miR-466f-3p	0	NA	NA	NA	NA	NA	0	0	0	0	0	0	0	0	0	0	0
chr2:10467248-10467271	MIMAT0017327	mmu-miR-669f-5p	0	NA	NA	NA	NA	NA	0	0	0	0	0	0	0	0	0	0	0
chr2:10467285-10467307	MIMAT0005839	mmu-miR-669f-3p	0	NA	NA	NA	NA	NA	0	0	0	0	0	0	0	0	0	0	0
chr2:10467574-10467594	MIMAT0017330	mmu-miR-669e-3p	0.505297	-0.430526	1.74421	-0.246831	0.805039	NA	0	0	0	2.35924	0.676345	0.859488	0.941252	0.721943	0	0	0
chr2:10467814-10467835	MIMAT0003476	mmu-miR-669b-5p	0.105439	0.307426	3.14975	0.0976031	0.922247	NA	0	0	0	0	0	0	0	0	0	0	1.15983
chr2:10467851-10467873	MIMAT0017250	mmu-miR-669b-3p	0	NA	NA	NA	NA	NA	0	0	0	0	0	0	0	0	0	0	0
chr2:10468384-10468405	MIMAT0005833	mmu-miR-669d-5p	0	NA	NA	NA	NA	NA	0	0	0	0	0	0	0	0	0	0	0
chr2:10468423-10468443	MIMAT0017324	mmu-miR-669d-3p	0	NA	NA	NA	NA	NA	0	0	0	0	0	0	0	0	0	0	0
chr2:10468685-10468706	MIMAT0004881_1	mmu-miR-466f-5p	0	NA	NA	NA	NA	NA	0	0	0	0	0	0	0	0	0	0	0
chr2:10468729-10468749	MIMAT0004882_1	mmu-miR-466f-3p	0	NA	NA	NA	NA	NA	0	0	0	0	0	0	0	0	0	0	0
chr2:10469027-10469048	MIMAT0017345	mmu-miR-669l-3p	0.107238	-0.750537	3.14975	-0.238285	0.81166	NA	0	0	0	1.17962	0	0	0	0	0	0	0
chr2:10471696-10471717	MIMAT0014884	mmu-miR-669d-2-3p	0.0656312	0.307426	3.14975	0.0976031	0.922247	NA	0	0	0	0	0	0	0	0.721943	0	0	0
chr2:10471963-10471984	MIMAT0004881_2	mmu-miR-466f-5p	0	NA	NA	NA	NA	NA	0	0	0	0	0	0	0	0	0	0	0
chr2:10472007-10472027	MIMAT0004882_2	mmu-miR-466f-3p	0	NA	NA	NA	NA	NA	0	0	0	0	0	0	0	0	0	0	0
chr2:10472264-10472285	MIMAT0000375	mmu-miR-297a-5p	0	NA	NA	NA	NA	NA	0	0	0	0	0	0	0	0	0	0	0
chr2:10472553-10472574	MIMAT0014885	mmu-miR-466o-5p	0	NA	NA	NA	NA	NA	0	0	0	0	0	0	0	0	0	0	0
chr2:10472589-10472610	MIMAT0014886	mmu-miR-466o-3p	0	NA	NA	NA	NA	NA	0	0	0	0	0	0	0	0	0	0	0
chr2:10473977-10473998	MIMAT0017275	mmu-miR-467c-3p	0.0656312	0.307426	3.14975	0.0976031	0.922247	NA	0	0	0	0	0	0	0	0.721943	0	0	0
chr2:10474228-10474249	MIMAT0004875	mmu-miR-466b-5p	0	NA	NA	NA	NA	NA	0	0	0	0	0	0	0	0	0	0	0
chr2:10474269-10474290	MIMAT0004876	mmu-miR-466b-3p	0	NA	NA	NA	NA	NA	0	0	0	0	0	0	0	0	0	0	0
chr2:10474460-10474483	MIMAT0003477	mmu-miR-669a-5p	0	NA	NA	NA	NA	NA	0	0	0	0	0	0	0	0	0	0	0
chr2:10474496-10474518	MIMAT0017251	mmu-miR-669a-3-3p	0	NA	NA	NA	NA	NA	0	0	0	0	0	0	0	0	0	0	0
chr2:10475318-10475342	MIMAT0017323	mmu-miR-669k-5p	0	NA	NA	NA	NA	NA	0	0	0	0	0	0	0	0	0	0	0
chr2:10475364-10475384	MIMAT0005831	mmu-miR-669k-3p	0	NA	NA	NA	NA	NA	0	0	0	0	0	0	0	0	0	0	0
chr2:10476355-10476376	MIMAT0003409	mmu-miR-467a-5p	0	NA	NA	NA	NA	NA	0	0	0	0	0	0	0	0	0	0	0
chr2:10476390-10476411	MIMAT0002108	mmu-miR-467a-3p	0	NA	NA	NA	NA	NA	0	0	0	0	0	0	0	0	0	0	0
chr2:10476640-10476661	MIMAT0004875_1	mmu-miR-466b-5p	0	NA	NA	NA	NA	NA	0	0	0	0	0	0	0	0	0	0	0
chr2:10476681-10476702	MIMAT0004876_1	mmu-miR-466b-3p	0	NA	NA	NA	NA	NA	0	0	0	0	0	0	0	0	0	0	0
chr2:10476872-10476895	MIMAT0003477_1	mmu-miR-669a-5p	0	NA	NA	NA	NA	NA	0	0	0	0	0	0	0	0	0	0	0
chr2:10476908-10476930	MIMAT0017243	mmu-miR-669a-3p	0	NA	NA	NA	NA	NA	0	0	0	0	0	0	0	0	0	0	0
chr2:10477170-10477192	MIMAT0005832	mmu-miR-669g	0	NA	NA	NA	NA	NA	0	0	0	0	0	0	0	0	0	0	0
chr2:10477989-10478010	MIMAT0005838	mmu-miR-669j	0	NA	NA	NA	NA	NA	0	0	0	0	0	0	0	0	0	0	0
chr2:10478812-10478833	MIMAT0003409_1	mmu-miR-467a-5p	0	NA	NA	NA	NA	NA	0	0	0	0	0	0	0	0	0	0	0
chr2:10478847-10478868	MIMAT0002108_1	mmu-miR-467a-3p	0	NA	NA	NA	NA	NA	0	0	0	0	0	0	0	0	0	0	0
chr2:10479099-10479120	MIMAT0004879	mmu-miR-466e-5p	0	NA	NA	NA	NA	NA	0	0	0	0	0	0	0	0	0	0	0
chr2:10479138-10479160	MIMAT0004880	mmu-miR-466e-3p	0	NA	NA	NA	NA	NA	0	0	0	0	0	0	0	0	0	0	0
chr2:10479330-10479353	MIMAT0003477_2	mmu-miR-669a-5p	0	NA	NA	NA	NA	NA	0	0	0	0	0	0	0	0	0	0	0
chr2:10479366-10479388	MIMAT0017243_1	mmu-miR-669a-3p	0	NA	NA	NA	NA	NA	0	0	0	0	0	0	0	0	0	0	0
chr2:10481256-10481276	MIMAT0005448	mmu-miR-467b-5p	0	NA	NA	NA	NA	NA	0	0	0	0	0	0	0	0	0	0	0
chr2:10481293-10481314	MIMAT0003478	mmu-miR-467b-3p	0	NA	NA	NA	NA	NA	0	0	0	0	0	0	0	0	0	0	0
chr2:10481544-10481567	MIMAT0004877	mmu-miR-466c-5p	0	NA	NA	NA	NA	NA	0	0	0	0	0	0	0	0	0	0	0
chr2:10481585-10481606	MIMAT0004878	mmu-miR-466c-3p	0	NA	NA	NA	NA	NA	0	0	0	0	0	0	0	0	0	0	0
chr2:10481776-10481799	MIMAT0003477_3	mmu-miR-669a-5p	0	NA	NA	NA	NA	NA	0	0	0	0	0	0	0	0	0	0	0
chr2:10481812-10481834	MIMAT0017243_2	mmu-miR-669a-3p	0	NA	NA	NA	NA	NA	0	0	0	0	0	0	0	0	0	0	0
chr2:10483692-10483713	MIMAT0003409_2	mmu-miR-467a-5p	0	NA	NA	NA	NA	NA	0	0	0	0	0	0	0	0	0	0	0
chr2:10483727-10483748	MIMAT0002108_2	mmu-miR-467a-3p	0	NA	NA	NA	NA	NA	0	0	0	0	0	0	0	0	0	0	0
chr2:10483979-10484002	MIMAT0004877_1	mmu-miR-466c-5p	0	NA	NA	NA	NA	NA	0	0	0	0	0	0	0	0	0	0	0
chr2:10484020-10484041	MIMAT0004878_1	mmu-miR-466c-3p	0	NA	NA	NA	NA	NA	0	0	0	0	0	0	0	0	0	0	0
chr2:10484211-10484234	MIMAT0003477_4	mmu-miR-669a-5p	0	NA	NA	NA	NA	NA	0	0	0	0	0	0	0	0	0	0	0
chr2:10484247-10484269	MIMAT0017243_3	mmu-miR-669a-3p	0	NA	NA	NA	NA	NA	0	0	0	0	0	0	0	0	0	0	0
chr2:10486149-10486170	MIMAT0003409_3	mmu-miR-467a-5p	0	NA	NA	NA	NA	NA	0	0	0	0	0	0	0	0	0	0	0
chr2:10486184-10486205	MIMAT0002108_3	mmu-miR-467a-3p	0	NA	NA	NA	NA	NA	0	0	0	0	0	0	0	0	0	0	0
chr2:10486436-10486457	MIMAT0004875_2	mmu-miR-466b-5p	0	NA	NA	NA	NA	NA	0	0	0	0	0	0	0	0	0	0	0
chr2:10486477-10486498	MIMAT0004876_2	mmu-miR-466b-3p	0	NA	NA	NA	NA	NA	0	0	0	0	0	0	0	0	0	0	0
chr2:10486668-10486691	MIMAT0003477_5	mmu-miR-669a-5p	0	NA	NA	NA	NA	NA	0	0	0	0	0	0	0	0	0	0	0
chr2:10486704-10486726	MIMAT0017243_4	mmu-miR-669a-3p	0	NA	NA	NA	NA	NA	0	0	0	0	0	0	0	0	0	0	0
chr2:10488613-10488634	MIMAT0003409_4	mmu-miR-467a-5p	0	NA	NA	NA	NA	NA	0	0	0	0	0	0	0	0	0	0	0
chr2:10488648-10488669	MIMAT0002108_4	mmu-miR-467a-3p	0	NA	NA	NA	NA	NA	0	0	0	0	0	0	0	0	0	0	0
chr2:10488898-10488919	MIMAT0004875_3	mmu-miR-466b-5p	0	NA	NA	NA	NA	NA	0	0	0	0	0	0	0	0	0	0	0
chr2:10488939-10488960	MIMAT0004876_3	mmu-miR-466b-3p	0	NA	NA	NA	NA	NA	0	0	0	0	0	0	0	0	0	0	0
chr2:10489130-10489153	MIMAT0014889	mmu-miR-669p-5p	0	NA	NA	NA	NA	NA	0	0	0	0	0	0	0	0	0	0	0
chr2:10489167-10489190	MIMAT0014890	mmu-miR-669p-3p	0.0722888	0.307426	3.14975	0.0976031	0.922247	NA	0	0	0	0	0	0	0	0	0	0.795177	0
chr2:10491062-10491083	MIMAT0003409_5	mmu-miR-467a-5p	0	NA	NA	NA	NA	NA	0	0	0	0	0	0	0	0	0	0	0
chr2:10491097-10491118	MIMAT0002108_5	mmu-miR-467a-3p	0	NA	NA	NA	NA	NA	0	0	0	0	0	0	0	0	0	0	0
chr2:10491349-10491372	MIMAT0004877_2	mmu-miR-466c-5p	0	NA	NA	NA	NA	NA	0	0	0	0	0	0	0	0	0	0	0
chr2:10491390-10491411	MIMAT0004878_2	mmu-miR-466c-3p	0	NA	NA	NA	NA	NA	0	0	0	0	0	0	0	0	0	0	0
chr2:10491581-10491604	MIMAT0003477_6	mmu-miR-669a-5p	0	NA	NA	NA	NA	NA	0	0	0	0	0	0	0	0	0	0	0
chr2:10491617-10491639	MIMAT0017243_5	mmu-miR-669a-3p	0	NA	NA	NA	NA	NA	0	0	0	0	0	0	0	0	0	0	0
chr2:10493524-10493545	MIMAT0003409_6	mmu-miR-467a-5p	0	NA	NA	NA	NA	NA	0	0	0	0	0	0	0	0	0	0	0
chr2:10493559-10493580	MIMAT0002108_6	mmu-miR-467a-3p	0	NA	NA	NA	NA	NA	0	0	0	0	0	0	0	0	0	0	0
chr2:10493811-10493832	MIMAT0004875_4	mmu-miR-466b-5p	0	NA	NA	NA	NA	NA	0	0	0	0	0	0	0	0	0	0	0
chr2:10493852-10493873	MIMAT0004876_4	mmu-miR-466b-3p	0	NA	NA	NA	NA	NA	0	0	0	0	0	0	0	0	0	0	0
chr2:10494043-10494066	MIMAT0003477_7	mmu-miR-669a-5p	0	NA	NA	NA	NA	NA	0	0	0	0	0	0	0	0	0	0	0
chr2:10494079-10494101	MIMAT0017243_6	mmu-miR-669a-3p	0	NA	NA	NA	NA	NA	0	0	0	0	0	0	0	0	0	0	0
chr2:10495994-10496015	MIMAT0003409_7	mmu-miR-467a-5p	0	NA	NA	NA	NA	NA	0	0	0	0	0	0	0	0	0	0	0
chr2:10496029-10496050	MIMAT0002108_7	mmu-miR-467a-3p	0	NA	NA	NA	NA	NA	0	0	0	0	0	0	0	0	0	0	0
chr2:10496279-10496300	MIMAT0004875_5	mmu-miR-466b-5p	0	NA	NA	NA	NA	NA	0	0	0	0	0	0	0	0	0	0	0
chr2:10496320-10496341	MIMAT0004876_5	mmu-miR-466b-3p	0	NA	NA	NA	NA	NA	0	0	0	0	0	0	0	0	0	0	0
chr2:10496511-10496534	MIMAT0014889_1	mmu-miR-669p-5p	0	NA	NA	NA	NA	NA	0	0	0	0	0	0	0	0	0	0	0
chr2:10496548-10496571	MIMAT0014890_1	mmu-miR-669p-3p	0	NA	NA	NA	NA	NA	0	0	0	0	0	0	0	0	0	0	0
chr2:10498407-10498428	MIMAT0003409_8	mmu-miR-467a-5p	0	NA	NA	NA	NA	NA	0	0	0	0	0	0	0	0	0	0	0
chr2:10498442-10498463	MIMAT0002108_8	mmu-miR-467a-3p	0	NA	NA	NA	NA	NA	0	0	0	0	0	0	0	0	0	0	0
chr2:10498694-10498715	MIMAT0004875_6	mmu-miR-466b-5p	0	NA	NA	NA	NA	NA	0	0	0	0	0	0	0	0	0	0	0
chr2:10498735-10498756	MIMAT0004876_6	mmu-miR-466b-3p	0	NA	NA	NA	NA	NA	0	0	0	0	0	0	0	0	0	0	0
chr2:10498926-10498949	MIMAT0003477_8	mmu-miR-669a-5p	0	NA	NA	NA	NA	NA	0	0	0	0	0	0	0	0	0	0	0
chr2:10498962-10498984	MIMAT0017243_7	mmu-miR-669a-3p	0	NA	NA	NA	NA	NA	0	0	0	0	0	0	0	0	0	0	0
chr2:10501354-10501377	MIMAT0003477_9	mmu-miR-669a-5p	0	NA	NA	NA	NA	NA	0	0	0	0	0	0	0	0	0	0	0
chr2:10501390-10501412	MIMAT0017243_8	mmu-miR-669a-3p	0	NA	NA	NA	NA	NA	0	0	0	0	0	0	0	0	0	0	0
chr2:10503287-10503308	MIMAT0003409_9	mmu-miR-467a-5p	0	NA	NA	NA	NA	NA	0	0	0	0	0	0	0	0	0	0	0
chr2:10503322-10503343	MIMAT0002108_9	mmu-miR-467a-3p	0	NA	NA	NA	NA	NA	0	0	0	0	0	0	0	0	0	0	0
chr2:10503806-10503829	MIMAT0003477_10	mmu-miR-669a-5p	0	NA	NA	NA	NA	NA	0	0	0	0	0	0	0	0	0	0	0
chr2:10503842-10503864	MIMAT0017243_9	mmu-miR-669a-3p	0	NA	NA	NA	NA	NA	0	0	0	0	0	0	0	0	0	0	0
chr2:10505768-10505789	MIMAT0005294	mmu-miR-467e-3p	0.171071	0.788319	3.14975	0.25028	0.802371	NA	0	0	0	0	0	0	0	0.721943	0	0	1.15983
chr2:10506020-10506040	MIMAT0014891	mmu-miR-466p-5p	0	NA	NA	NA	NA	NA	0	0	0	0	0	0	0	0	0	0	0
chr2:10506059-10506080	MIMAT0014892	mmu-miR-466p-3p	0	NA	NA	NA	NA	NA	0	0	0	0	0	0	0	0	0	0	0
chr2:10507928-10507949	MIMAT0004759	mmu-miR-466a-5p	0	NA	NA	NA	NA	NA	0	0	0	0	0	0	0	0	0	0	0
chr2:10507967-10507989	MIMAT0002107	mmu-miR-466a-3p	0	NA	NA	NA	NA	NA	0	0	0	0	0	0	0	0	0	0	0
chr2:10509026-10509047	MIMAT0004865	mmu-miR-297c-5p	0	NA	NA	NA	NA	NA	0	0	0	0	0	0	0	0	0	0	0
chr2:10509065-10509086	MIMAT0004866	mmu-miR-297c-3p	0	NA	NA	NA	NA	NA	0	0	0	0	0	0	0	0	0	0	0
chr2:10509359-10509380	MIMAT0017253	mmu-miR-669c-3p	0	NA	NA	NA	NA	NA	0	0	0	0	0	0	0	0	0	0	0
chr2:10510185-10510208	MIMAT0003477_11	mmu-miR-669a-5p	0	NA	NA	NA	NA	NA	0	0	0	0	0	0	0	0	0	0	0
chr2:10510221-10510243	MIMAT0017243_10	mmu-miR-669a-3p	0	NA	NA	NA	NA	NA	0	0	0	0	0	0	0	0	0	0	0
chr2:10511686-10511707	MIMAT0003480	mmu-miR-297b-5p	0.515506	0.731977	1.72433	0.424498	0.671202	NA	0	1.02765	0	0	0.676345	0.859488	0.941252	2.16583	0	0	0
chr2:10511723-10511744	MIMAT0004827	mmu-miR-297b-3p	0.279815	-0.806844	2.39205	-0.337302	0.735889	NA	0	0	0	1.17962	0.676345	0	0	0	1.222	0	0
chr2:10511977-10511998	MIMAT0004930	mmu-miR-466d-5p	0	NA	NA	NA	NA	NA	0	0	0	0	0	0	0	0	0	0	0
chr2:10512017-10512037	MIMAT0004931	mmu-miR-466d-3p	0.229335	1.24666	2.53052	0.49265	0.62226	NA	0	0	0	0	0	0.859488	0.941252	0.721943	0	0	0
chr2:10512814-10512836	MIMAT0017346	mmu-miR-669m-5p	0	NA	NA	NA	NA	NA	0	0	0	0	0	0	0	0	0	0	0
chr2:10512847-10512868	MIMAT0009419	mmu-miR-669m-3p	0	NA	NA	NA	NA	NA	0	0	0	0	0	0	0	0	0	0	0
chr2:10513457-10513479	MIMAT0017346_1	mmu-miR-669m-5p	0.0614859	-0.750537	3.14975	-0.238285	0.81166	NA	0	0	0	0	0.676345	0	0	0	0	0	0
chr2:10513490-10513511	MIMAT0009419_1	mmu-miR-669m-3p	0	NA	NA	NA	NA	NA	0	0	0	0	0	0	0	0	0	0	0
chr2:10513759-10513780	MIMAT0014893	mmu-miR-466n-5p	0.139621	-0.269644	3.14975	-0.0856079	0.931778	NA	0	0	0	0	0.676345	0.859488	0	0	0	0	0
chr2:10513798-10513819	MIMAT0014894	mmu-miR-466n-3p	0.228559	1.25198	2.98298	0.419708	0.674699	NA	0	0	0	0	0	1.71898	0	0	0	0.795177	0
chr2:10514642-10514662	MIMAT0004883	mmu-miR-466g	0	NA	NA	NA	NA	NA	0	0	0	0	0	0	0	0	0	0	0
chr2:10514901-10514922	MIMAT0004884	mmu-miR-466h-5p	0	NA	NA	NA	NA	NA	0	0	0	0	0	0	0	0	0	0	0
chr2:10514940-10514958	MIMAT0017274	mmu-miR-466h-3p	0	NA	NA	NA	NA	NA	0	0	0	0	0	0	0	0	0	0	0
chr2:10515830-10515851	MIMAT0000375_1	mmu-miR-297a-5p	0	NA	NA	NA	NA	NA	0	0	0	0	0	0	0	0	0	0	0
chr2:10515869-10515890	MIMAT0004864	mmu-miR-297a-3p	0	NA	NA	NA	NA	NA	0	0	0	0	0	0	0	0	0	0	0
chr2:10516117-10516138	MIMAT0017322	mmu-miR-466l-5p	0	NA	NA	NA	NA	NA	0	0	0	0	0	0	0	0	0	0	0
chr2:10516156-10516177	MIMAT0005830	mmu-miR-466l-3p	0	NA	NA	NA	NA	NA	0	0	0	0	0	0	0	0	0	0	0
chr2:10517077-10517098	MIMAT0000375_2	mmu-miR-297a-5p	0	NA	NA	NA	NA	NA	0	0	0	0	0	0	0	0	0	0	0
chr2:10517116-10517137	MIMAT0004864_1	mmu-miR-297a-3p	0	NA	NA	NA	NA	NA	0	0	0	0	0	0	0	0	0	0	0
chr2:10517671-10517691	MIMAT0005840	mmu-miR-669i	0	NA	NA	NA	NA	NA	0	0	0	0	0	0	0	0	0	0	0
chr2:10518219-10518240	MIMAT0005842	mmu-miR-669h-3p	0	NA	NA	NA	NA	NA	0	0	0	0	0	0	0	0	0	0	0
chr2:17563541-17563562	MIMAT0025175	mmu-miR-6419	0	NA	NA	NA	NA	NA	0	0	0	0	0	0	0	0	0	0	0
chr2:18057882-18057903	MIMAT0029817	mmu-miR-7655-3p	0.133775	-0.269644	3.14975	-0.0856079	0.931778	NA	0	0	0	0	0.676345	0	0	0	0	0.795177	0
chr2:22654321-22654340	MIMAT0019351	mmu-miR-3967	0	NA	NA	NA	NA	NA	0	0	0	0	0	0	0	0	0	0	0
chr2:25059811-25059831	MIMAT0029834	mmu-miR-7664-5p	0.0656312	0.307426	3.14975	0.0976031	0.922247	NA	0	0	0	0	0	0	0	0.721943	0	0	0
chr2:26470059-26470081	MIMAT0027895	mmu-miR-6996-3p	0.0614859	-0.750537	3.14975	-0.238285	0.81166	NA	0	0	0	0	0.676345	0	0	0	0	0	0
chr2:27450549-27450572	MIMAT0029578	mmu-miR-7578	0	NA	NA	NA	NA	NA	0	0	0	0	0	0	0	0	0	0	0
chr2:28733286-28733307	MIMAT0014897	mmu-miR-3088-5p	0.222713	1.23048	3.00613	0.409323	0.682302	NA	0	0	0	0	0	0.859488	0	0	0	1.59035	0
chr2:29475217-29475239	MIMAT0025078	mmu-miR-133c	0	NA	NA	NA	NA	NA	0	0	0	0	0	0	0	0	0	0	0
chr2:29995996-29996018	MIMAT0027897	mmu-miR-6997-3p	0.449312	-0.422216	2.17106	-0.194475	0.845804	NA	1.47077	1.02765	0	0	0	0	0	0	2.44401	0	0
chr2:30721222-30721243	MIMAT0014899	mmu-miR-3089-5p	0.133706	-0.750537	3.14975	-0.238285	0.81166	NA	1.47077	0	0	0	0	0	0	0	0	0	0
chr2:30721259-30721281	MIMAT0014900	mmu-miR-3089-3p	0.71366	0.573579	1.47976	0.387617	0.6983	NA	0	2.05531	0	0	0.676345	1.71898	1.8825	0.721943	0	0.795177	0
chr2:31612462-31612483	MIMAT0027899	mmu-miR-6998-3p	0.645011	-0.304632	1.62035	-0.188003	0.850874	NA	0	0	2.13529	0	1.35269	0	0.941252	1.44389	1.222	0	0
chr2:32050946-32050969	MIMAT0029856	mmu-miR-7674-5p	0.374531	-0.417389	2.0188	-0.206751	0.836204	NA	1.47077	0	1.06765	0	0	0.859488	0	0.721943	0	0	0
chr2:32050988-32051008	MIMAT0029857	mmu-miR-7674-3p	0.525452	0.0918196	1.71504	0.053538	0.957303	NA	0	1.02765	0	0	1.35269	0	1.8825	0.721943	0	0.795177	0
chr2:32318317-32318338	MIMAT0035714	mmu-miR-3154	0	NA	NA	NA	NA	NA	0	0	0	0	0	0	0	0	0	0	0
chr2:32652342-32652362	MIMAT0009425	mmu-miR-1954	0	NA	NA	NA	NA	NA	0	0	0	0	0	0	0	0	0	0	0
chr2:32687706-32687726	MIMAT0031394	mmu-miR-8093	0	NA	NA	NA	NA	NA	0	0	0	0	0	0	0	0	0	0	0
chr2:32712819-32712837	MIMAT0013803	mmu-miR-2861	0	NA	NA	NA	NA	NA	0	0	0	0	0	0	0	0	0	0	0
chr2:32712907-32712926	MIMAT0019336	mmu-miR-3960	0.0656312	0.307426	3.14975	0.0976031	0.922247	NA	0	0	0	0	0	0	0	0.721943	0	0	0
chr2:42447515-42447535	MIMAT0025079	mmu-miR-6336	0	NA	NA	NA	NA	NA	0	0	0	0	0	0	0	0	0	0	0
chr2:45023146-45023167	MIMAT0020640	mmu-miR-5129-5p	0.599112	-0.778461	1.54543	-0.503717	0.61446	NA	1.47077	1.02765	0	0	1.35269	0	0	0.721943	1.222	0.795177	0
chr2:56785825-56785846	MIMAT0025076	mmu-miR-195b	0.13792	0.788319	3.14975	0.25028	0.802371	NA	0	0	0	0	0	0	0	0.721943	0	0.795177	0
chr2:65364297-65364319	MIMAT0025080	mmu-miR-6337	0	NA	NA	NA	NA	NA	0	0	0	0	0	0	0	0	0	0	0
chr2:67675457-67675477	MIMAT0028416	mmu-miR-7224-5p	0.0855684	0.307426	3.14975	0.0976031	0.922247	NA	0	0	0	0	0	0	0.941252	0	0	0	0
chr2:67781045-67781066	MIMAT0025077	mmu-miR-6335	0	NA	NA	NA	NA	NA	0	0	0	0	0	0	0	0	0	0	0
chr2:74726114-74726135	MIMAT0004538	mmu-miR-10b-3p	0.0614859	-0.750537	3.14975	-0.238285	0.81166	NA	0	0	0	0	0.676345	0	0	0	0	0	0
chr2:80628714-80628732	MIMAT0003462	mmu-miR-684	0	NA	NA	NA	NA	NA	0	0	0	0	0	0	0	0	0	0	0
chr2:91944908-91944930	MIMAT0027900	mmu-miR-6999-5p	0.457785	0.68733	2.20042	0.312363	0.754764	NA	0	0	0	0	1.35269	0	0	2.88777	0	0.795177	0
chr2:92192035-92192055	MIMAT0017348	mmu-miR-1955-3p	0.715625	-1.20424	1.41123	-0.853324	0.393479	NA	1.47077	1.02765	1.06765	1.17962	0.676345	0.859488	0	0	0	1.59035	0
chr2:92387420-92387441	MIMAT0027902	mmu-miR-7000-5p	0.0722888	0.307426	3.14975	0.0976031	0.922247	NA	0	0	0	0	0	0	0	0	0	0.795177	0
chr2:92592206-92592226	MIMAT0028410	mmu-miR-7221-5p	0	NA	NA	NA	NA	NA	0	0	0	0	0	0	0	0	0	0	0
chr2:92592257-92592277	MIMAT0028411	mmu-miR-7221-3p	0	NA	NA	NA	NA	NA	0	0	0	0	0	0	0	0	0	0	0
chr2:92594602-92594628	MIMAT0028412	mmu-miR-7222-5p	0	NA	NA	NA	NA	NA	0	0	0	0	0	0	0	0	0	0	0
chr2:92594654-92594676	MIMAT0028413	mmu-miR-7222-3p	0	NA	NA	NA	NA	NA	0	0	0	0	0	0	0	0	0	0	0
chr2:93421980-93422002	MIMAT0027904	mmu-miR-7001-5p	0	NA	NA	NA	NA	NA	0	0	0	0	0	0	0	0	0	0	0
chr2:93421929-93421948	MIMAT0027905	mmu-miR-7001-3p	0	NA	NA	NA	NA	NA	0	0	0	0	0	0	0	0	0	0	0
chr2:104428871-104428892	MIMAT0007863	mmu-miR-1902	0.105439	0.307426	3.14975	0.0976031	0.922247	NA	0	0	0	0	0	0	0	0	0	0	1.15983
chr2:114150547-114150567	MIMAT0027906	mmu-miR-7002-5p	0	NA	NA	NA	NA	NA	0	0	0	0	0	0	0	0	0	0	0
chr2:114150516-114150534	MIMAT0027907	mmu-miR-7002-3p	0	NA	NA	NA	NA	NA	0	0	0	0	0	0	0	0	0	0	0
chr2:115638777-115638798	MIMAT0009422	mmu-miR-1951	0	NA	NA	NA	NA	NA	0	0	0	0	0	0	0	0	0	0	0
chr2:120017517-120017539	MIMAT0029836	mmu-miR-7665-5p	0.0656312	0.307426	3.14975	0.0976031	0.922247	NA	0	0	0	0	0	0	0	0.721943	0	0	0
chr2:120017558-120017579	MIMAT0029837	mmu-miR-7665-3p	0	NA	NA	NA	NA	NA	0	0	0	0	0	0	0	0	0	0	0
chr2:122640814-122640837	MIMAT0017269	mmu-miR-147-5p	0	NA	NA	NA	NA	NA	0	0	0	0	0	0	0	0	0	0	0
chr2:126902290-126902309	MIMAT0031427	mmu-miR-3473g	0.574222	-0.964317	2.11735	-0.455435	0.648796	NA	0	3.08296	1.06765	0	0	0	0	2.16583	0	0	0
chr2:130016369-130016391	MIMAT0025082	mmu-miR-6339	0	NA	NA	NA	NA	NA	0	0	0	0	0	0	0	0	0	0	0
chr2:131040375-131040398	MIMAT0027908	mmu-miR-6973b-5p	0.31896	0.652664	2.34779	0.27799	0.78102	NA	0	0	1.06765	0	0	1.71898	0	0.721943	0	0	0
chr2:131040326-131040345	MIMAT0027909	mmu-miR-6973b-3p	0.454867	1.23833	2.54099	0.487342	0.626016	NA	0	1.02765	0	0	0	0	0	0	0	3.97588	0
chr2:131288066-131288088	MIMAT0017025	mmu-miR-103-2-5p	0.64513	1.83685	1.78226	1.03062	0.302717	NA	0	1.02765	0	0	0	0.859488	2.82376	0	0	2.38553	0
chr2:133564722-133564742	MIMAT0014901	mmu-miR-3090-5p	0.107238	-0.750537	3.14975	-0.238285	0.81166	NA	0	0	0	1.17962	0	0	0	0	0	0	0
chr2:133564760-133564781	MIMAT0014902	mmu-miR-3090-3p	0	NA	NA	NA	NA	NA	0	0	0	0	0	0	0	0	0	0	0
chr2:138819943-138819959	MIMAT0009423	mmu-miR-1952	0	NA	NA	NA	NA	NA	0	0	0	0	0	0	0	0	0	0	0
chr2:151967581-151967602	MIMAT0009424	mmu-miR-1953	0.0614859	-0.750537	3.14975	-0.238285	0.81166	NA	0	0	0	0	0.676345	0	0	0	0	0	0
chr2:152865067-152865088	MIMAT0022371	mmu-miR-5622-5p	0.105439	0.307426	3.14975	0.0976031	0.922247	NA	0	0	0	0	0	0	0	0	0	0	1.15983
chr2:152865105-152865126	MIMAT0022372	mmu-miR-5622-3p	0	NA	NA	NA	NA	NA	0	0	0	0	0	0	0	0	0	0	0
chr2:155356831-155356852	MIMAT0003481	mmu-miR-695	0	NA	NA	NA	NA	NA	0	0	0	0	0	0	0	0	0	0	0
chr2:155622929-155622951	MIMAT0017254	mmu-miR-499-3p	0.157857	0.788319	3.14975	0.25028	0.802371	NA	0	0	0	0	0	0	0.941252	0	0	0.795177	0
chr2:158243504-158243524	MIMAT0029897	mmu-miR-7685-3p	0	NA	NA	NA	NA	NA	0	0	0	0	0	0	0	0	0	0	0
chr2:158638583-158638604	MIMAT0015646	mmu-miR-3474	0.25128	0.211255	2.476	0.0853208	0.932006	NA	0	1.02765	0	0	0	0	0.941252	0	0	0.795177	0
chr2:163068095-163068115	MIMAT0027910	mmu-miR-7003-5p	0	NA	NA	NA	NA	NA	0	0	0	0	0	0	0	0	0	0	0
chr2:163068137-163068155	MIMAT0027911	mmu-miR-7003-3p	0	NA	NA	NA	NA	NA	0	0	0	0	0	0	0	0	0	0	0
chr2:164354363-164354383	MIMAT0029870	mmu-miR-7678-5p	0	NA	NA	NA	NA	NA	0	0	0	0	0	0	0	0	0	0	0
chr2:164354313-164354334	MIMAT0029871	mmu-miR-7678-3p	0	NA	NA	NA	NA	NA	0	0	0	0	0	0	0	0	0	0	0
chr2:173701098-173701120	MIMAT0025083	mmu-miR-6340	0.0934232	-0.750537	3.14975	-0.238285	0.81166	NA	0	1.02765	0	0	0	0	0	0	0	0	0
chr2:180179797-180179818	MIMAT0027914	mmu-miR-7005-5p	0	NA	NA	NA	NA	NA	0	0	0	0	0	0	0	0	0	0	0
chr2:180179756-180179780	MIMAT0027915	mmu-miR-7005-3p	0.107238	-0.750537	3.14975	-0.238285	0.81166	NA	0	0	0	1.17962	0	0	0	0	0	0	0
chr2:180257547-180257567	MIMAT0014903	mmu-miR-3091-5p	0.0656312	0.307426	3.14975	0.0976031	0.922247	NA	0	0	0	0	0	0	0	0.721943	0	0	0
chr2:180257580-180257601	MIMAT0014904	mmu-miR-3091-3p	0.163704	0.788319	3.14975	0.25028	0.802371	NA	0	0	0	0	0	0.859488	0.941252	0	0	0	0
chr2:180389057-180389079	MIMAT0016979	mmu-miR-1a-1-5p	0	NA	NA	NA	NA	NA	0	0	0	0	0	0	0	0	0	0	0
chr2:180389096-180389117	MIMAT0000123_1	mmu-miR-1a-3p	0	NA	NA	NA	NA	NA	0	0	0	0	0	0	0	0	0	0	0
chr2:180398401-180398421	MIMAT0003473_1	mmu-miR-133a-5p	0.22054	-0.805686	2.56409	-0.314219	0.753355	NA	0	1.02765	0	0	0.676345	0	0	0.721943	0	0	0
chr2:181587939-181587963	MIMAT0027916	mmu-miR-7006-5p	0	NA	NA	NA	NA	NA	0	0	0	0	0	0	0	0	0	0	0
chr3:20222332-20222354	MIMAT0027918	mmu-miR-7007-5p	0	NA	NA	NA	NA	NA	0	0	0	0	0	0	0	0	0	0	0
chr3:20222294-20222311	MIMAT0027919	mmu-miR-7007-3p	0.0855684	0.307426	3.14975	0.0976031	0.922247	NA	0	0	0	0	0	0	0.941252	0	0	0	0
chr3:27584958-27584979	MIMAT0014905	mmu-miR-3092-5p	0	NA	NA	NA	NA	NA	0	0	0	0	0	0	0	0	0	0	0
chr3:27584915-27584935	MIMAT0014906	mmu-miR-3092-3p	0	NA	NA	NA	NA	NA	0	0	0	0	0	0	0	0	0	0	0
chr3:28419988-28420007	MIMAT0020631	mmu-miR-466q	0.107238	-0.750537	3.14975	-0.238285	0.81166	NA	0	0	0	1.17962	0	0	0	0	0	0	0
chr3:29636768-29636790	MIMAT0025121	mmu-miR-21b	0	NA	NA	NA	NA	NA	0	0	0	0	0	0	0	0	0	0	0
chr3:31038971-31038994	MIMAT0027920	mmu-miR-7008-5p	0.0970587	-0.750537	3.14975	-0.238285	0.81166	NA	0	0	1.06765	0	0	0	0	0	0	0	0
chr3:34638474-34638495	MIMAT0007864	mmu-miR-1897-5p	0	NA	NA	NA	NA	NA	0	0	0	0	0	0	0	0	0	0	0
chr3:34638511-34638532	MIMAT0007865	mmu-miR-1897-3p	0	NA	NA	NA	NA	NA	0	0	0	0	0	0	0	0	0	0	0
chr3:34922623-34922644	MIMAT0025124	mmu-miR-6378	0	NA	NA	NA	NA	NA	0	0	0	0	0	0	0	0	0	0	0
chr3:36475498-36475519	MIMAT0027922	mmu-miR-7009-5p	0.0781353	0.307426	3.14975	0.0976031	0.922247	NA	0	0	0	0	0	0.859488	0	0	0	0	0
chr3:36475461-36475481	MIMAT0027923	mmu-miR-7009-3p	0.0722888	0.307426	3.14975	0.0976031	0.922247	NA	0	0	0	0	0	0	0	0	0	0.795177	0
chr3:46900700-46900721	MIMAT0025125	mmu-miR-6379	0	NA	NA	NA	NA	NA	0	0	0	0	0	0	0	0	0	0	0
chr3:57317490-57317511	MIMAT0049859	mmu-miR-12195-5p	0.19666	0.78832	3.09018	0.255105	0.798642	NA	0	0	0	0	0	0	0.941252	0	1.222	0	0
chr3:57317450-57317469	MIMAT0049860	mmu-miR-12195-3p	0.216055	1.20774	2.57634	0.468781	0.639226	NA	0	0	0	0	0	0.859488	0	0.721943	0	0.795177	0
chr3:57616699-57616721	MIMAT0025122	mmu-miR-6377	0	NA	NA	NA	NA	NA	0	0	0	0	0	0	0	0	0	0	0
chr3:65659328-65659349	MIMAT0031426	mmu-miR-8120	0.4842	-0.945852	1.9076	-0.495834	0.620012	NA	0	1.02765	2.13529	0	0	0	0.941252	0	1.222	0	0
chr3:82106248-82106268	MIMAT0027925	mmu-miR-7010-3p	0.131262	0.788319	3.14975	0.25028	0.802371	NA	0	0	0	0	0	0	0	1.44389	0	0	0
chr3:85467396-85467418	MIMAT0005845	mmu-miR-466k	0	NA	NA	NA	NA	NA	0	0	0	0	0	0	0	0	0	0	0
chr3:88440924-88440946	MIMAT0027926	mmu-miR-7011-5p	0	NA	NA	NA	NA	NA	0	0	0	0	0	0	0	0	0	0	0
chr3:88536311-88536332	MIMAT0007866	mmu-miR-1905	0	NA	NA	NA	NA	NA	0	0	0	0	0	0	0	0	0	0	0
chr3:90011188-90011210	MIMAT0029844	mmu-miR-7669-5p	0.696395	1.96544	1.57709	1.24624	0.212676	NA	0	0	0	1.17962	0	2.57846	0.941252	2.16583	0	0.795177	0
chr3:90011153-90011175	MIMAT0029845	mmu-miR-7669-3p	0	NA	NA	NA	NA	NA	0	0	0	0	0	0	0	0	0	0	0
chr3:90070067-90070089	MIMAT0017267	mmu-miR-190b-3p	0.169347	-0.269644	3.14975	-0.0856079	0.931778	NA	0	0	1.06765	0	0	0	0	0	0	0.795177	0
chr3:90270154-90270176	MIMAT0027928	mmu-miR-7012-5p	0.0656312	0.307426	3.14975	0.0976031	0.922247	NA	0	0	0	0	0	0	0	0.721943	0	0	0
chr3:90270191-90270212	MIMAT0027929	mmu-miR-7012-3p	0.200661	-1.39948	3.07569	-0.455012	0.649101	NA	0	1.02765	0	1.17962	0	0	0	0	0	0	0
chr3:95139131-95139151	MIMAT0031401_1	mmu-miR-8099	0	NA	NA	NA	NA	NA	0	0	0	0	0	0	0	0	0	0	0
chr3:95734947-95734968	MIMAT0027932	mmu-miR-7014-5p	0	NA	NA	NA	NA	NA	0	0	0	0	0	0	0	0	0	0	0
chr3:95734911-95734931	MIMAT0027933	mmu-miR-7014-3p	0	NA	NA	NA	NA	NA	0	0	0	0	0	0	0	0	0	0	0
chr3:97690543-97690562	MIMAT0028418	mmu-miR-7225-5p	0.260823	-0.806514	2.43723	-0.330914	0.74071	NA	1.47077	0	0	0	0.676345	0	0	0.721943	0	0	0
chr3:97690509-97690530	MIMAT0028419	mmu-miR-7225-3p	0	NA	NA	NA	NA	NA	0	0	0	0	0	0	0	0	0	0	0
chr3:99199367-99199385	MIMAT0027339	mmu-miR-6481	0	NA	NA	NA	NA	NA	0	0	0	0	0	0	0	0	0	0	0
chr3:115979905-115979924	MIMAT0009427	mmu-miR-669n	0	NA	NA	NA	NA	NA	0	0	0	0	0	0	0	0	0	0	0
chr3:116667598-116667617	MIMAT0049861	mmu-miR-3473h-5p	0.127117	-0.269644	3.14975	-0.0856079	0.931778	NA	0	0	0	0	0.676345	0	0	0.721943	0	0	0
chr3:122541661-122541681	MIMAT0029820	mmu-miR-7657-5p	0	NA	NA	NA	NA	NA	0	0	0	0	0	0	0	0	0	0	0
chr3:122541625-122541647	MIMAT0029821	mmu-miR-7657-3p	0	NA	NA	NA	NA	NA	0	0	0	0	0	0	0	0	0	0	0
chr3:127545238-127545260	MIMAT0003373	mmu-miR-302b-5p	0	NA	NA	NA	NA	NA	0	0	0	0	0	0	0	0	0	0	0
chr3:127545275-127545297	MIMAT0003374	mmu-miR-302b-3p	0	NA	NA	NA	NA	NA	0	0	0	0	0	0	0	0	0	0	0
chr3:127545368-127545389	MIMAT0003375	mmu-miR-302c-5p	0	NA	NA	NA	NA	NA	0	0	0	0	0	0	0	0	0	0	0
chr3:127545406-127545427	MIMAT0003376	mmu-miR-302c-3p	0	NA	NA	NA	NA	NA	0	0	0	0	0	0	0	0	0	0	0
chr3:127545501-127545522	MIMAT0004579	mmu-miR-302a-5p	0	NA	NA	NA	NA	NA	0	0	0	0	0	0	0	0	0	0	0
chr3:127545539-127545561	MIMAT0000380	mmu-miR-302a-3p	0	NA	NA	NA	NA	NA	0	0	0	0	0	0	0	0	0	0	0
chr3:127545629-127545651	MIMAT0017225	mmu-miR-302d-5p	0	NA	NA	NA	NA	NA	0	0	0	0	0	0	0	0	0	0	0
chr3:127545665-127545687	MIMAT0003377	mmu-miR-302d-3p	0.105439	0.307426	3.14975	0.0976031	0.922247	NA	0	0	0	0	0	0	0	0	0	0	1.15983
chr3:127545741-127545761	MIMAT0017214	mmu-miR-367-5p	0	NA	NA	NA	NA	NA	0	0	0	0	0	0	0	0	0	0	0
chr3:127545779-127545800	MIMAT0003181	mmu-miR-367-3p	0	NA	NA	NA	NA	NA	0	0	0	0	0	0	0	0	0	0	0
chr3:134240515-134240536	MIMAT0007867	mmu-miR-1895	0	NA	NA	NA	NA	NA	0	0	0	0	0	0	0	0	0	0	0
chr3:137783536-137783559	MIMAT0025126	mmu-miR-6380	0	NA	NA	NA	NA	NA	0	0	0	0	0	0	0	0	0	0	0
chr3:138526425-138526446	MIMAT0009428	mmu-miR-1956	0.278017	0.211255	2.41042	0.0876425	0.930161	NA	0	0	0	0	0.676345	0	0	0	1.222	0	1.15983
chr3:142623925-142623945	MIMAT0025127	mmu-miR-6381	0	NA	NA	NA	NA	NA	0	0	0	0	0	0	0	0	0	0	0
chr3:151023839-151023857	MIMAT0019341	mmu-miR-3963	0	NA	NA	NA	NA	NA	0	0	0	0	0	0	0	0	0	0	0
chr4:3537103-3537124	MIMAT0015642	mmu-miR-3471	0	NA	NA	NA	NA	NA	0	0	0	0	0	0	0	0	0	0	0
chr4:10845585-10845606	MIMAT0015642_1	mmu-miR-3471	0	NA	NA	NA	NA	NA	0	0	0	0	0	0	0	0	0	0	0
chr4:11134156-11134174	MIMAT0003462_1	mmu-miR-684	0	NA	NA	NA	NA	NA	0	0	0	0	0	0	0	0	0	0	0
chr4:15942907-15942927	MIMAT0025152	mmu-miR-6400	0	NA	NA	NA	NA	NA	0	0	0	0	0	0	0	0	0	0	0
chr4:33438153-33438174	MIMAT0031424	mmu-miR-8118	0.407556	0.767877	2.23032	0.34429	0.730628	NA	0	0	0	1.17962	0	0.859488	0	0	2.44401	0	0
chr4:36645383-36645404	MIMAT0004855	mmu-miR-876-3p	0	NA	NA	NA	NA	NA	0	0	0	0	0	0	0	0	0	0	0
chr4:40722968-40722990	MIMAT0000240	mmu-miR-207	0	NA	NA	NA	NA	NA	0	0	0	0	0	0	0	0	0	0	0
chr4:40850057-40850080	MIMAT0020633	mmu-miR-5123	0.0855684	0.307426	3.14975	0.0976031	0.922247	NA	0	0	0	0	0	0	0.941252	0	0	0	0
chr4:40993696-40993716	MIMAT0014909	mmu-miR-3094-5p	0.290083	0.211255	2.37751	0.0888557	0.929197	NA	0	1.02765	0	0	0	0	0.941252	0	1.222	0	0
chr4:44221197-44221219	MIMAT0020613	mmu-miR-5106	0.111091	0.307426	3.14975	0.0976031	0.922247	NA	0	0	0	0	0	0	0	0	1.222	0	0
chr4:44607536-44607558	MIMAT0020628	mmu-miR-5120	0	NA	NA	NA	NA	NA	0	0	0	0	0	0	0	0	0	0	0
chr4:48213134-48213155	MIMAT0009431	mmu-miR-1958	0.0855684	0.307426	3.14975	0.0976031	0.922247	NA	0	0	0	0	0	0	0.941252	0	0	0	0
chr4:58441064-58441085	MIMAT0014911	mmu-miR-3095-5p	0.218329	-0.269643	2.98526	-0.0903247	0.928029	NA	0	0	0	1.17962	0	0	0	0	1.222	0	0
chr4:58441023-58441045	MIMAT0014912	mmu-miR-3095-3p	0.287814	1.27675	2.7857	0.458324	0.64672	NA	0	0	0	0	0	0	0	0.721943	2.44401	0	0
chr4:91373285-91373307	MIMAT0025154	mmu-miR-6402	0	NA	NA	NA	NA	NA	0	0	0	0	0	0	0	0	0	0	0
chr4:108087414-108087434	MIMAT0025149	mmu-miR-6397	0	NA	NA	NA	NA	NA	0	0	0	0	0	0	0	0	0	0	0
chr4:109017669-109017690	MIMAT0003893	mmu-miR-761	0	NA	NA	NA	NA	NA	0	0	0	0	0	0	0	0	0	0	0
chr4:118210539-118210564	MIMAT0028420	mmu-miR-7226-5p	0.111091	0.307426	3.14975	0.0976031	0.922247	NA	0	0	0	0	0	0	0	0	1.222	0	0
chr4:120973295-120973317	MIMAT0027934	mmu-miR-7015-5p	0.295841	-1.18934	2.35563	-0.504892	0.613635	NA	0	0	0	1.17962	1.35269	0	0	0.721943	0	0	0
chr4:123616493-123616513	MIMAT0025150	mmu-miR-6398	0	NA	NA	NA	NA	NA	0	0	0	0	0	0	0	0	0	0	0
chr4:124731768-124731788	MIMAT0003487	mmu-miR-697	0	NA	NA	NA	NA	NA	0	0	0	0	0	0	0	0	0	0	0
chr4:124743852-124743870	MIMAT0003488	mmu-miR-698-3p	0	NA	NA	NA	NA	NA	0	0	0	0	0	0	0	0	0	0	0
chr4:124743818-124743838	MIMAT0022930	mmu-miR-698-5p	0.179527	-0.269644	3.14975	-0.0856079	0.931778	NA	0	0	0	1.17962	0	0	0	0	0	0.795177	0
chr4:125504805-125504825	MIMAT0003471_2	mmu-miR-692	0	NA	NA	NA	NA	NA	0	0	0	0	0	0	0	0	0	0	0
chr4:126559865-126559885	MIMAT0028135	mmu-miR-7119-5p	0	NA	NA	NA	NA	NA	0	0	0	0	0	0	0	0	0	0	0
chr4:126559898-126559918	MIMAT0028136	mmu-miR-7119-3p	0	NA	NA	NA	NA	NA	0	0	0	0	0	0	0	0	0	0	0
chr4:129557756-129557775	MIMAT0031425	mmu-miR-8119	0	NA	NA	NA	NA	NA	0	0	0	0	0	0	0	0	0	0	0
chr4:129684546-129684566	MIMAT0027936	mmu-miR-7016-5p	0.283905	-1.90245	2.76972	-0.686873	0.492163	NA	0	2.05531	1.06765	0	0	0	0	0	0	0	0
chr4:133195660-133195683	MIMAT0027938	mmu-miR-7017-5p	0.355608	0.653131	2.28007	0.286452	0.774532	NA	1.47077	0	0	0	0	1.71898	0	0.721943	0	0	0
chr4:133195696-133195716	MIMAT0027939	mmu-miR-7017-3p	0	NA	NA	NA	NA	NA	0	0	0	0	0	0	0	0	0	0	0
chr4:133717089-133717108	MIMAT0028422	mmu-miR-7227-5p	0	NA	NA	NA	NA	NA	0	0	0	0	0	0	0	0	0	0	0
chr4:133717050-133717071	MIMAT0028423	mmu-miR-7227-3p	0.0934232	-0.750537	3.14975	-0.238285	0.81166	NA	0	1.02765	0	0	0	0	0	0	0	0	0
chr4:134567757-134567778	MIMAT0025155	mmu-miR-6403	0	NA	NA	NA	NA	NA	0	0	0	0	0	0	0	0	0	0	0
chr4:137538286-137538309	MIMAT0027940	mmu-miR-7018-5p	0	NA	NA	NA	NA	NA	0	0	0	0	0	0	0	0	0	0	0
chr4:137538349-137538370	MIMAT0027941	mmu-miR-7018-3p	0.200661	-1.39948	3.07569	-0.455012	0.649101	NA	0	1.02765	0	1.17962	0	0	0	0	0	0	0
chr4:138163263-138163284	MIMAT0025151	mmu-miR-6399	0	NA	NA	NA	NA	NA	0	0	0	0	0	0	0	0	0	0	0
chr4:138316173-138316195	MIMAT0027942	mmu-miR-7019-5p	0.154909	-1.28404	3.14459	-0.408332	0.68303	NA	0	1.02765	0	0	0.676345	0	0	0	0	0	0
chr4:139644047-139644070	MIMAT0027944	mmu-miR-7020-5p	0	NA	NA	NA	NA	NA	0	0	0	0	0	0	0	0	0	0	0
chr4:139644091-139644111	MIMAT0027945	mmu-miR-7020-3p	0.243847	0.211254	2.49736	0.0845912	0.932586	NA	0	1.02765	0	0	0	0.859488	0	0	0	0.795177	0
chr4:139967531-139967554	MIMAT0011215	mmu-miR-2139	0	NA	NA	NA	NA	NA	0	0	0	0	0	0	0	0	0	0	0
chr4:143136100-143136121	MIMAT0027947	mmu-miR-7021-3p	0.0614859	-0.750537	3.14975	-0.238285	0.81166	NA	0	0	0	0	0.676345	0	0	0	0	0	0
chr4:148146973-148146995	MIMAT0027948	mmu-miR-7022-5p	0.254858	1.24683	2.45469	0.507939	0.611496	NA	0	0	0	0	0	0.859488	0	0.721943	1.222	0	0
chr4:149537863-149537883	MIMAT0022359	mmu-miR-5616-5p	0.154909	-1.28404	3.14459	-0.408332	0.68303	NA	0	1.02765	0	0	0.676345	0	0	0	0	0	0
chr4:149537901-149537922	MIMAT0022360	mmu-miR-5616-3p	0.362372	0.723716	2.02406	0.357557	0.720675	NA	0	1.02765	0	0	0	0	0.941252	0	1.222	0.795177	0
chr4:149655540-149655562	MIMAT0027950	mmu-miR-7023-5p	0	NA	NA	NA	NA	NA	0	0	0	0	0	0	0	0	0	0	0
chr4:149655504-149655525	MIMAT0027951	mmu-miR-7023-3p	0.678864	-1.18037	1.49453	-0.789796	0.429647	NA	0	2.05531	0	2.35924	0.676345	0.859488	0	0.721943	0	0.795177	0
chr4:150797930-150797952	MIMAT0049862	mmu-miR-12196-5p	0	NA	NA	NA	NA	NA	0	0	0	0	0	0	0	0	0	0	0
chr4:150797898-150797919	MIMAT0049863	mmu-miR-12196-3p	0	NA	NA	NA	NA	NA	0	0	0	0	0	0	0	0	0	0	0
chr4:156053954-156053974	MIMAT0017178	mmu-miR-429-5p	0.105439	0.307426	3.14975	0.0976031	0.922247	NA	0	0	0	0	0	0	0	0	0	0	1.15983
chr4:156230096-156230115	MIMAT0029822	mmu-miR-7658-5p	0.0614859	-0.750537	3.14975	-0.238285	0.81166	NA	0	0	0	0	0.676345	0	0	0	0	0	0
chr4:156230059-156230079	MIMAT0029823	mmu-miR-7658-3p	0.514696	-0.202531	1.74921	-0.115785	0.907823	NA	0	0	1.06765	0	1.35269	0.859488	0	0	1.222	0	1.15983
chr5:21673874-21673891	MIMAT0049864	mmu-miR-12197-3p	0	NA	NA	NA	NA	NA	0	0	0	0	0	0	0	0	0	0	0
chr5:30647936-30647956	MIMAT0022379	mmu-miR-5625-5p	0.163704	0.788319	3.14975	0.25028	0.802371	NA	0	0	0	0	0	0.859488	0.941252	0	0	0	0
chr5:30647991-30648015	MIMAT0022380	mmu-miR-5625-3p	0	NA	NA	NA	NA	NA	0	0	0	0	0	0	0	0	0	0	0
chr5:31667296-31667316	MIMAT0025587	mmu-miR-3473e	0	NA	NA	NA	NA	NA	0	0	0	0	0	0	0	0	0	0	0
chr5:32092765-32092783	MIMAT0049865	mmu-miR-12198-3p	0	NA	NA	NA	NA	NA	0	0	0	0	0	0	0	0	0	0	0
chr5:33898946-33898966	MIMAT0027952	mmu-miR-7024-5p	0.256639	1.27497	2.45548	0.519235	0.603597	NA	0	0	0	0	0	0	0.941252	0.721943	0	0	1.15983
chr5:33898910-33898932	MIMAT0027953	mmu-miR-7024-3p	0.517942	-1.02898	1.7364	-0.592594	0.553453	NA	1.47077	1.02765	0	1.17962	0	0.859488	0	0	0	0	1.15983
chr5:34574151-34574172	MIMAT0029808	mmu-miR-7036b-5p	0.334813	-1.19273	2.27565	-0.524128	0.600189	NA	1.47077	0	0	0	1.35269	0.859488	0	0	0	0	0
chr5:34574192-34574213	MIMAT0029809	mmu-miR-7036b-3p	0.192807	-0.269643	3.11058	-0.086686	0.930921	NA	0	0	0	1.17962	0	0	0.941252	0	0	0	0
chr5:34732872-34732892	MIMAT0005854	mmu-miR-467g	0	NA	NA	NA	NA	NA	0	0	0	0	0	0	0	0	0	0	0
chr5:35021050-35021072	MIMAT0014915	mmu-miR-3097-5p	0.60799	0.0266408	1.56933	0.0169759	0.986456	NA	0	0	1.06765	1.17962	0.676345	0	1.8825	0.721943	0	0	1.15983
chr5:36301570-36301588	MIMAT0029908	mmu-miR-7689-5p	0	NA	NA	NA	NA	NA	0	0	0	0	0	0	0	0	0	0	0
chr5:41891400-41891421	MIMAT0025168	mmu-miR-6414	0	NA	NA	NA	NA	NA	0	0	0	0	0	0	0	0	0	0	0
chr5:50252823-50252843	MIMAT0031423	mmu-miR-8117	0.240944	-1.39765	2.90761	-0.480688	0.630738	NA	1.47077	0	0	1.17962	0	0	0	0	0	0	0
chr5:52135972-52135993	MIMAT0025172	mmu-miR-6417	0	NA	NA	NA	NA	NA	0	0	0	0	0	0	0	0	0	0	0
chr5:64970328-64970350	MIMAT0004893	mmu-miR-574-5p	0	NA	NA	NA	NA	NA	0	0	0	0	0	0	0	0	0	0	0
chr5:75176836-75176859	MIMAT0027954	mmu-miR-7025-5p	0	NA	NA	NA	NA	NA	0	0	0	0	0	0	0	0	0	0	0
chr5:75176878-75176899	MIMAT0027955	mmu-miR-7025-3p	0.219275	-0.269643	2.98103	-0.090453	0.927927	NA	1.47077	0	0	0	0	0	0.941252	0	0	0	0
chr5:77084517-77084537	MIMAT0049866	mmu-miR-12199-3p	0.27605	-0.908973	2.41223	-0.376819	0.706308	NA	0	1.02765	1.06765	0	0	0	0.941252	0	0	0	0
chr5:77272767-77272787	MIMAT0020605	mmu-miR-5098	0	NA	NA	NA	NA	NA	0	0	0	0	0	0	0	0	0	0	0
chr5:82798964-82798986	MIMAT0005837	mmu-miR-1187	0	NA	NA	NA	NA	NA	0	0	0	0	0	0	0	0	0	0	0
chr5:87595963-87595982	MIMAT0019353	mmu-miR-3969	0.0614859	-0.750537	3.14975	-0.238285	0.81166	NA	0	0	0	0	0.676345	0	0	0	0	0	0
chr5:92458559-92458580	MIMAT0025169	mmu-miR-6415	0	NA	NA	NA	NA	NA	0	0	0	0	0	0	0	0	0	0	0
chr5:92788465-92788481	MIMAT0009434	mmu-miR-1961	0	NA	NA	NA	NA	NA	0	0	0	0	0	0	0	0	0	0	0
chr5:98475616-98475636	MIMAT0003493	mmu-miR-703	0	NA	NA	NA	NA	NA	0	0	0	0	0	0	0	0	0	0	0
chr5:104048003-104048023	MIMAT0022365	mmu-miR-5619-5p	0.0722888	0.307426	3.14975	0.0976031	0.922247	NA	0	0	0	0	0	0	0	0	0	0.795177	0
chr5:104048042-104048063	MIMAT0022366	mmu-miR-5619-3p	0.158545	-1.28404	3.14459	-0.408332	0.68303	NA	0	0	1.06765	0	0.676345	0	0	0	0	0	0
chr5:110666116-110666136	MIMAT0027956	mmu-miR-7026-5p	0.243847	0.211254	2.49736	0.0845912	0.932586	NA	0	1.02765	0	0	0	0.859488	0	0	0	0.795177	0
chr5:110666075-110666097	MIMAT0027957	mmu-miR-7026-3p	0.444135	-0.422743	2.18985	-0.193047	0.846922	NA	2.94154	0	0	0	0	0	0	0.721943	1.222	0	0
chr5:111004170-111004190	MIMAT0003491	mmu-miR-701-5p	0.336204	-0.906323	2.29371	-0.395134	0.692744	NA	1.47077	0	1.06765	0	0	0	0	0	0	0	1.15983
chr5:113324525-113324545	MIMAT0028426	mmu-miR-7229-5p	0	NA	NA	NA	NA	NA	0	0	0	0	0	0	0	0	0	0	0
chr5:113324493-113324516	MIMAT0028427	mmu-miR-7229-3p	0	NA	NA	NA	NA	NA	0	0	0	0	0	0	0	0	0	0	0
chr5:113337623-113337645	MIMAT0028428	mmu-miR-7230-5p	0	NA	NA	NA	NA	NA	0	0	0	0	0	0	0	0	0	0	0
chr5:113337590-113337612	MIMAT0028429	mmu-miR-7230-3p	0	NA	NA	NA	NA	NA	0	0	0	0	0	0	0	0	0	0	0
chr5:114404473-114404495	MIMAT0027958	mmu-miR-7027-5p	0	NA	NA	NA	NA	NA	0	0	0	0	0	0	0	0	0	0	0
chr5:114719515-114719537	MIMAT0027960	mmu-miR-7028-5p	0.0970587	-0.750537	3.14975	-0.238285	0.81166	NA	0	0	1.06765	0	0	0	0	0	0	0	0
chr5:114719557-114719578	MIMAT0027961	mmu-miR-7028-3p	0.211841	-0.269643	3.01506	-0.0894319	0.928739	NA	1.47077	0	0	0	0	0.859488	0	0	0	0	0
chr5:115580954-115580976	MIMAT0027962	mmu-miR-7029-5p	0.0855684	0.307426	3.14975	0.0976031	0.922247	NA	0	0	0	0	0	0	0.941252	0	0	0	0
chr5:115580984-115581005	MIMAT0027963	mmu-miR-7029-3p	0.171071	0.788319	3.14975	0.25028	0.802371	NA	0	0	0	0	0	0	0	0.721943	0	0	1.15983
chr5:115645578-115645599	MIMAT0027964	mmu-miR-7030-5p	0	NA	NA	NA	NA	NA	0	0	0	0	0	0	0	0	0	0	0
chr5:115645612-115645632	MIMAT0027965	mmu-miR-7030-3p	0.626356	0.111881	1.4879	0.0751938	0.940061	NA	0	1.02765	1.06765	0	0.676345	0	0.941252	0	1.222	0.795177	1.15983
chr5:121819209-121819229	MIMAT0027967	mmu-miR-7031-3p	0.681486	0.237947	1.65107	0.144117	0.885408	NA	0	3.08296	0	0	0	0	0.941252	0.721943	0	1.59035	1.15983
chr5:122682664-122682685	MIMAT0031421	mmu-miR-8115	0	NA	NA	NA	NA	NA	0	0	0	0	0	0	0	0	0	0	0
chr5:123522674-123522695	MIMAT0029796	mmu-miR-7647-5p	0.0722888	0.307426	3.14975	0.0976031	0.922247	NA	0	0	0	0	0	0	0	0	0	0.795177	0
chr5:123522637-123522657	MIMAT0029797	mmu-miR-7647-3p	0	NA	NA	NA	NA	NA	0	0	0	0	0	0	0	0	0	0	0
chr5:123996857-123996882	MIMAT0027968	mmu-miR-7032-5p	0	NA	NA	NA	NA	NA	0	0	0	0	0	0	0	0	0	0	0
chr5:125781719-125781738	MIMAT0049868	mmu-miR-12200-3p	0	NA	NA	NA	NA	NA	0	0	0	0	0	0	0	0	0	0	0
chr5:134326494-134326512	MIMAT0019347	mmu-miR-3965	0	NA	NA	NA	NA	NA	0	0	0	0	0	0	0	0	0	0	0
chr5:135383783-135383805	MIMAT0027970	mmu-miR-7033-5p	0.133775	-0.269644	3.14975	-0.0856079	0.931778	NA	0	0	0	0	0.676345	0	0	0	0	0.795177	0
chr5:135383730-135383750	MIMAT0027971	mmu-miR-7033-3p	0.408862	1.00913	1.78078	0.566679	0.570932	NA	0	0	0	1.17962	0	0.859488	0.941252	0.721943	0	0.795177	0
chr5:135735864-135735884	MIMAT0027972	mmu-miR-7034-5p	0.111091	0.307426	3.14975	0.0976031	0.922247	NA	0	0	0	0	0	0	0	0	1.222	0	0
chr5:135735807-135735830	MIMAT0027973	mmu-miR-7034-3p	0.375545	0.719368	2.2568	0.318755	0.749912	NA	1.47077	0	0	0	0	1.71898	0.941252	0	0	0	0
chr5:136105527-136105547	MIMAT0027974	mmu-miR-7035-5p	0	NA	NA	NA	NA	NA	0	0	0	0	0	0	0	0	0	0	0
chr5:136375777-136375797	MIMAT0003515	mmu-miR-721	0	NA	NA	NA	NA	NA	0	0	0	0	0	0	0	0	0	0	0
chr5:136991442-136991462	MIMAT0022931	mmu-miR-702-5p	0.556957	2.34847	1.65005	1.42327	0.154659	NA	0	0	0	0	0	0.859488	0.941252	0.721943	2.44401	0	1.15983
chr5:137293800-137293820	MIMAT0031422	mmu-miR-8116	0	NA	NA	NA	NA	NA	0	0	0	0	0	0	0	0	0	0	0
chr5:137296661-137296683	MIMAT0027976	mmu-miR-7036a-5p	0	NA	NA	NA	NA	NA	0	0	0	0	0	0	0	0	0	0	0
chr5:137529551-137529571	MIMAT0025173	mmu-miR-6418-5p	0	NA	NA	NA	NA	NA	0	0	0	0	0	0	0	0	0	0	0
chr5:139767915-139767938	MIMAT0027978	mmu-miR-7037-5p	0.224686	0.211251	3.00222	0.0703649	0.943903	NA	0	1.02765	0	0	0	0	0	1.44389	0	0	0
chr5:139767879-139767900	MIMAT0027979	mmu-miR-7037-3p	0.320552	-1.99273	2.68064	-0.743379	0.457252	NA	1.47077	2.05531	0	0	0	0	0	0	0	0	0
chr5:140427344-140427365	MIMAT0027980	mmu-miR-7038-5p	0.240477	-0.806084	2.50047	-0.322374	0.74717	NA	0	1.02765	0	0	0.676345	0	0.941252	0	0	0	0
chr5:140427388-140427409	MIMAT0027981	mmu-miR-7038-3p	0.620981	1.0602	1.54719	0.685244	0.49319	NA	0	1.02765	0	0	0.676345	0.859488	0	0.721943	0	2.38553	1.15983
chr5:144896790-144896811	MIMAT0027982	mmu-miR-7039-5p	0.230765	-1.39808	2.9448	-0.474764	0.634956	NA	1.47077	0	1.06765	0	0	0	0	0	0	0	0
chr5:144896732-144896753	MIMAT0027983	mmu-miR-7039-3p	0.171558	-0.269644	3.14975	-0.0856079	0.931778	NA	0	1.02765	0	0	0	0.859488	0	0	0	0	0
chr5:147283257-147283275	MIMAT0025580	mmu-let-7k	0.144578	0.788319	3.14975	0.25028	0.802371	NA	0	0	0	0	0	0	0	0	0	1.59035	0
chr6:3721355-3721375	MIMAT0004943	mmu-miR-653-5p	13.7512	-3.00697	0.890545	-3.37655	NA	NA	2.94154	1.02765	6.40587	114.423	6.76345	1.71898	4.70626	2.88777	4.88801	3.18071	2.31967
chr6:3721315-3721335	MIMAT0017284	mmu-miR-653-3p	0	NA	NA	NA	NA	NA	0	0	0	0	0	0	0	0	0	0	0
chr6:3721957-3721981	MIMAT0022704	mmu-miR-489-5p	0	NA	NA	NA	NA	NA	0	0	0	0	0	0	0	0	0	0	0
chr6:19555438-19555458	MIMAT0025114	mmu-miR-6370	0	NA	NA	NA	NA	NA	0	0	0	0	0	0	0	0	0	0	0
chr6:27936672-27936693	MIMAT0017234	mmu-miR-592-3p	0.0934232	-0.750537	3.14975	-0.238285	0.81166	NA	0	1.02765	0	0	0	0	0	0	0	0	0
chr6:38507325-38507346	MIMAT0029846	mmu-miR-7670-5p	0	NA	NA	NA	NA	NA	0	0	0	0	0	0	0	0	0	0	0
chr6:38507371-38507393	MIMAT0029847	mmu-miR-7670-3p	0.0855684	0.307426	3.14975	0.0976031	0.922247	NA	0	0	0	0	0	0	0.941252	0	0	0	0
chr6:50572459-50572481	MIMAT0025115	mmu-miR-6371	0	NA	NA	NA	NA	NA	0	0	0	0	0	0	0	0	0	0	0
chr6:52230129-52230150	MIMAT0001081	mmu-miR-196b-5p	0.0855684	0.307426	3.14975	0.0976031	0.922247	NA	0	0	0	0	0	0	0.941252	0	0	0	0
chr6:52230094-52230115	MIMAT0017170	mmu-miR-196b-3p	0	NA	NA	NA	NA	NA	0	0	0	0	0	0	0	0	0	0	0
chr6:81895640-81895663	MIMAT0028432	mmu-miR-7232-5p	0	NA	NA	NA	NA	NA	0	0	0	0	0	0	0	0	0	0	0
chr6:81895590-81895611	MIMAT0028433	mmu-miR-7232-3p	0	NA	NA	NA	NA	NA	0	0	0	0	0	0	0	0	0	0	0
chr6:81896602-81896624	MIMAT0002109	mmu-miR-468-3p	0	NA	NA	NA	NA	NA	0	0	0	0	0	0	0	0	0	0	0
chr6:81896629-81896655	MIMAT0022699	mmu-miR-468-5p	0	NA	NA	NA	NA	NA	0	0	0	0	0	0	0	0	0	0	0
chr6:83049716-83049737	MIMAT0027984	mmu-miR-7040-5p	0	NA	NA	NA	NA	NA	0	0	0	0	0	0	0	0	0	0	0
chr6:83049752-83049773	MIMAT0027985	mmu-miR-7040-3p	0.0656312	0.307426	3.14975	0.0976031	0.922247	NA	0	0	0	0	0	0	0	0.721943	0	0	0
chr6:83090360-83090380	MIMAT0015640	mmu-miR-3470a	0	NA	NA	NA	NA	NA	0	0	0	0	0	0	0	0	0	0	0
chr6:83401060-83401081	MIMAT0025118	mmu-miR-6374	0	NA	NA	NA	NA	NA	0	0	0	0	0	0	0	0	0	0	0
chr6:85336341-85336360	MIMAT0003495	mmu-miR-705	0	NA	NA	NA	NA	NA	0	0	0	0	0	0	0	0	0	0	0
chr6:85790203-85790225	MIMAT0025119	mmu-miR-6375	0	NA	NA	NA	NA	NA	0	0	0	0	0	0	0	0	0	0	0
chr6:88104204-88104225	MIMAT0025120	mmu-miR-6376	0	NA	NA	NA	NA	NA	0	0	0	0	0	0	0	0	0	0	0
chr6:94606388-94606410	MIMAT0027986	mmu-miR-7041-5p	0.186846	-1.40012	3.14284	-0.445496	0.655961	NA	0	2.05531	0	0	0	0	0	0	0	0	0
chr6:94606364-94606383	MIMAT0027987	mmu-miR-7041-3p	0.297938	-0.914703	2.74791	-0.332872	0.739231	NA	0	2.05531	0	0	0	0	0	0	1.222	0	0
chr6:99184999-99185019	MIMAT0049869	mmu-miR-12201-5p	0	NA	NA	NA	NA	NA	0	0	0	0	0	0	0	0	0	0	0
chr6:102794445-102794466	MIMAT0025117	mmu-miR-6373	0	NA	NA	NA	NA	NA	0	0	0	0	0	0	0	0	0	0	0
chr6:108489743-108489767	MIMAT0029828	mmu-miR-7661-5p	0	NA	NA	NA	NA	NA	0	0	0	0	0	0	0	0	0	0	0
chr6:108489782-108489803	MIMAT0029829	mmu-miR-7661-3p	0.522932	0.43527	1.73114	0.251436	0.801477	NA	0	1.02765	0	1.17962	0	0	0.941252	1.44389	0	0	1.15983
chr6:113707213-113707233	MIMAT0027988	mmu-miR-7042-5p	0.663672	-0.042833	1.55969	-0.0274624	0.978091	NA	2.94154	0	0	0	0.676345	0.859488	0.941252	0.721943	0	0	1.15983
chr6:113707245-113707265	MIMAT0027989	mmu-miR-7042-3p	0.480922	-1.29602	1.89089	-0.685401	0.493091	NA	0	0	1.06765	0	2.70538	0	0	0.721943	0	0.795177	0
chr6:115775657-115775678	MIMAT0029826	mmu-miR-7660-5p	0	NA	NA	NA	NA	NA	0	0	0	0	0	0	0	0	0	0	0
chr6:115775697-115775719	MIMAT0029827	mmu-miR-7660-3p	0	NA	NA	NA	NA	NA	0	0	0	0	0	0	0	0	0	0	0
chr6:116646020-116646042	MIMAT0027990	mmu-miR-7043-5p	0.111091	0.307426	3.14975	0.0976031	0.922247	NA	0	0	0	0	0	0	0	0	1.222	0	0
chr6:118085197-118085215	MIMAT0027992	mmu-miR-7044-5p	0	NA	NA	NA	NA	NA	0	0	0	0	0	0	0	0	0	0	0
chr6:120034290-120034311	MIMAT0003496	mmu-miR-706	0	NA	NA	NA	NA	NA	0	0	0	0	0	0	0	0	0	0	0
chr6:122831377-122831398	MIMAT0028430	mmu-miR-7231-5p	0.700999	-1.1893	1.48869	-0.798891	0.424354	NA	1.47077	2.05531	1.06765	0	0.676345	1.71898	0	0.721943	0	0	0
chr6:122831415-122831437	MIMAT0028431	mmu-miR-7231-3p	0	NA	NA	NA	NA	NA	0	0	0	0	0	0	0	0	0	0	0
chr6:124718365-124718386	MIMAT0004663	mmu-miR-200c-5p	0.642085	2.62091	1.74299	1.50369	0.132662	NA	0	0	0	0	0	1.71898	0.941252	0	1.222	3.18071	0
chr6:125097029-125097049	MIMAT0027994	mmu-miR-7045-5p	0	NA	NA	NA	NA	NA	0	0	0	0	0	0	0	0	0	0	0
chr6:125097066-125097086	MIMAT0027995	mmu-miR-7045-3p	0.574282	0.864278	1.5729	0.549481	0.582675	NA	0	1.02765	0	0	0.676345	0.859488	0.941252	0	1.222	1.59035	0
chr6:125234756-125234777	MIMAT0031419	mmu-miR-8113	0	NA	NA	NA	NA	NA	0	0	0	0	0	0	0	0	0	0	0
chr6:127788125-127788143	MIMAT0028434	mmu-miR-7233-5p	0	NA	NA	NA	NA	NA	0	0	0	0	0	0	0	0	0	0	0
chr6:127788084-127788105	MIMAT0028435	mmu-miR-7233-3p	0	NA	NA	NA	NA	NA	0	0	0	0	0	0	0	0	0	0	0
chr6:128974874-128974895	MIMAT0029800	mmu-miR-7649-5p	0	NA	NA	NA	NA	NA	0	0	0	0	0	0	0	0	0	0	0
chr6:128974840-128974862	MIMAT0029801	mmu-miR-7649-3p	0	NA	NA	NA	NA	NA	0	0	0	0	0	0	0	0	0	0	0
chr6:129691541-129691561	MIMAT0003457_1	mmu-miR-680	0	NA	NA	NA	NA	NA	0	0	0	0	0	0	0	0	0	0	0
chr7:3218639-3218660	MIMAT0000366	mmu-miR-290a-5p	0	NA	NA	NA	NA	NA	0	0	0	0	0	0	0	0	0	0	0
chr7:3218674-3218697	MIMAT0004572	mmu-miR-290a-3p	0	NA	NA	NA	NA	NA	0	0	0	0	0	0	0	0	0	0	0
chr7:3218674-3218695	MIMAT0029900	mmu-miR-290b-5p	0	NA	NA	NA	NA	NA	0	0	0	0	0	0	0	0	0	0	0
chr7:3218638-3218659	MIMAT0029901	mmu-miR-290b-3p	0	NA	NA	NA	NA	NA	0	0	0	0	0	0	0	0	0	0	0
chr7:3218932-3218953	MIMAT0000367	mmu-miR-291a-5p	0.17287	-0.269644	3.14975	-0.0856079	0.931778	NA	0	0	0	1.17962	0	0	0	0.721943	0	0	0
chr7:3218968-3218989	MIMAT0000368	mmu-miR-291a-3p	0	NA	NA	NA	NA	NA	0	0	0	0	0	0	0	0	0	0	0
chr7:3219200-3219221	MIMAT0000369	mmu-miR-292a-5p	0	NA	NA	NA	NA	NA	0	0	0	0	0	0	0	0	0	0	0
chr7:3219238-3219261	MIMAT0000370	mmu-miR-292a-3p	0	NA	NA	NA	NA	NA	0	0	0	0	0	0	0	0	0	0	0
chr7:3219237-3219259	MIMAT0029864	mmu-miR-292b-5p	0	NA	NA	NA	NA	NA	0	0	0	0	0	0	0	0	0	0	0
chr7:3219198-3219218	MIMAT0029865	mmu-miR-292b-3p	0	NA	NA	NA	NA	NA	0	0	0	0	0	0	0	0	0	0	0
chr7:3219494-3219515	MIMAT0003189	mmu-miR-291b-5p	0	NA	NA	NA	NA	NA	0	0	0	0	0	0	0	0	0	0	0
chr7:3219529-3219550	MIMAT0003190	mmu-miR-291b-3p	0	NA	NA	NA	NA	NA	0	0	0	0	0	0	0	0	0	0	0
chr7:3220356-3220377	MIMAT0004573	mmu-miR-293-5p	0	NA	NA	NA	NA	NA	0	0	0	0	0	0	0	0	0	0	0
chr7:3220390-3220411	MIMAT0000371	mmu-miR-293-3p	0	NA	NA	NA	NA	NA	0	0	0	0	0	0	0	0	0	0	0
chr7:3220655-3220676	MIMAT0004574	mmu-miR-294-5p	0	NA	NA	NA	NA	NA	0	0	0	0	0	0	0	0	0	0	0
chr7:3220691-3220712	MIMAT0000372	mmu-miR-294-3p	0	NA	NA	NA	NA	NA	0	0	0	0	0	0	0	0	0	0	0
chr7:3220779-3220800	MIMAT0004575	mmu-miR-295-5p	0	NA	NA	NA	NA	NA	0	0	0	0	0	0	0	0	0	0	0
chr7:3220815-3220837	MIMAT0000373	mmu-miR-295-3p	0	NA	NA	NA	NA	NA	0	0	0	0	0	0	0	0	0	0	0
chr7:3655970-3655991	MIMAT0022986	mmu-miR-3572-5p	0.0722888	0.307426	3.14975	0.0976031	0.922247	NA	0	0	0	0	0	0	0	0	0	0.795177	0
chr7:4917965-4917988	MIMAT0049871	mmu-miR-12202-5p	0	NA	NA	NA	NA	NA	0	0	0	0	0	0	0	0	0	0	0
chr7:4918009-4918030	MIMAT0049872	mmu-miR-12202-3p	0.301573	-0.907699	2.35301	-0.38576	0.699674	NA	0	1.02765	1.06765	0	0	0	0	0	1.222	0	0
chr7:6803600-6803620	MIMAT0014815	mmu-miR-3099-5p	0.27651	1.27689	2.81658	0.453349	0.650298	NA	0	0	0	0	0	0	0	0.721943	0	0	2.31967
chr7:7298926-7298946	MIMAT0022368	mmu-miR-5620-3p	0.354938	0.69672	2.02865	0.34344	0.731268	NA	0	1.02765	0	0	0	0.859488	0	0	1.222	0.795177	0
chr7:10958477-10958498	MIMAT0000375_3	mmu-miR-297a-5p	0	NA	NA	NA	NA	NA	0	0	0	0	0	0	0	0	0	0	0
chr7:19086828-19086850	MIMAT0014919	mmu-miR-3100-5p	0.0855684	0.307426	3.14975	0.0976031	0.922247	NA	0	0	0	0	0	0	0.941252	0	0	0	0
chr7:19086872-19086892	MIMAT0014920	mmu-miR-3100-3p	0.0722888	0.307426	3.14975	0.0976031	0.922247	NA	0	0	0	0	0	0	0	0	0	0.795177	0
chr7:19386688-19386707	MIMAT0004868	mmu-miR-343	0	NA	NA	NA	NA	NA	0	0	0	0	0	0	0	0	0	0	0
chr7:24970047-24970070	MIMAT0027996	mmu-miR-7046-5p	0	NA	NA	NA	NA	NA	0	0	0	0	0	0	0	0	0	0	0
chr7:24987640-24987662	MIMAT0027998	mmu-miR-7047-5p	0.678172	0.944071	1.66511	0.566971	0.570734	NA	0	2.05531	0	0	0	0.859488	0.941252	0	2.44401	0	1.15983
chr7:25097120-25097141	MIMAT0025581	mmu-miR-6537-5p	0	NA	NA	NA	NA	NA	0	0	0	0	0	0	0	0	0	0	0
chr7:25217699-25217720	MIMAT0028000	mmu-miR-7048-5p	0	NA	NA	NA	NA	NA	0	0	0	0	0	0	0	0	0	0	0
chr7:27176058-27176078	MIMAT0014921	mmu-miR-3101-5p	0.474943	1.1052	1.9035	0.580616	0.561499	NA	1.47077	0	0	0	0	0	0.941252	0	1.222	1.59035	0
chr7:27176020-27176040	MIMAT0014922	mmu-miR-3101-3p	0	NA	NA	NA	NA	NA	0	0	0	0	0	0	0	0	0	0	0
chr7:28560957-28560979	MIMAT0028002	mmu-miR-7049-5p	0	NA	NA	NA	NA	NA	0	0	0	0	0	0	0	0	0	0	0
chr7:28560925-28560945	MIMAT0028003	mmu-miR-7049-3p	0	NA	NA	NA	NA	NA	0	0	0	0	0	0	0	0	0	0	0
chr7:29083671-29083693	MIMAT0009436	mmu-miR-1963	0.521896	-2.08549	1.63572	-1.27497	0.202322	NA	0	1.02765	2.13529	1.17962	0.676345	0	0	0.721943	0	0	0
chr7:29773305-29773326	MIMAT0017349	mmu-miR-1964-5p	0.111091	0.307426	3.14975	0.0976031	0.922247	NA	0	0	0	0	0	0	0	0	1.222	0	0
chr7:29906546-29906567	MIMAT0029843	mmu-miR-7668-3p	0.532293	-1.25853	1.68285	-0.747855	0.454548	NA	0	2.05531	0	1.17962	0.676345	0	0	0.721943	1.222	0	0
chr7:30552839-30552860	MIMAT0036461	mmu-miR-9769-5p	0.0722888	0.307426	3.14975	0.0976031	0.922247	NA	0	0	0	0	0	0	0	0	0	0.795177	0
chr7:30589380-30589400	MIMAT0029854	mmu-miR-3569-5p	0.636747	-0.789804	1.65136	-0.478276	0.632454	NA	0	1.02765	0	2.35924	0.676345	1.71898	0	0	1.222	0	0
chr7:30589416-30589437	MIMAT0029855	mmu-miR-3569-3p	0.349592	0.618065	2.28084	0.270982	0.786405	NA	0	0	0	1.17962	0	0	0	1.44389	1.222	0	0
chr7:31040292-31040312	MIMAT0028004	mmu-miR-7050-5p	0	NA	NA	NA	NA	NA	0	0	0	0	0	0	0	0	0	0	0
chr7:31040258-31040278	MIMAT0028005	mmu-miR-7050-3p	0	NA	NA	NA	NA	NA	0	0	0	0	0	0	0	0	0	0	0
chr7:43457502-43457523	MIMAT0028006	mmu-miR-7051-5p	0	NA	NA	NA	NA	NA	0	0	0	0	0	0	0	0	0	0	0
chr7:43457546-43457567	MIMAT0028007	mmu-miR-7051-3p	0.0722888	0.307426	3.14975	0.0976031	0.922247	NA	0	0	0	0	0	0	0	0	0	0.795177	0
chr7:44470352-44470372	MIMAT0028008	mmu-miR-7052-5p	0	NA	NA	NA	NA	NA	0	0	0	0	0	0	0	0	0	0	0
chr7:44538153-44538173	MIMAT0028010	mmu-miR-7053-5p	0	NA	NA	NA	NA	NA	0	0	0	0	0	0	0	0	0	0	0
chr7:44538106-44538126	MIMAT0028011	mmu-miR-7053-3p	0	NA	NA	NA	NA	NA	0	0	0	0	0	0	0	0	0	0	0
chr7:44849705-44849725	MIMAT0003497	mmu-miR-707	0	NA	NA	NA	NA	NA	0	0	0	0	0	0	0	0	0	0	0
chr7:45012458-45012482	MIMAT0028012	mmu-miR-7054-5p	0.519216	-0.710439	1.85862	-0.38224	0.702284	NA	0	2.05531	0	0	1.35269	0.859488	0	1.44389	0	0	0
chr7:45012426-45012445	MIMAT0028013	mmu-miR-7054-3p	0.488225	1.422	1.71962	0.826927	0.408278	NA	0	0	0	0	0.676345	0	0	0.721943	1.222	1.59035	1.15983
chr7:45173303-45173323	MIMAT0028014	mmu-miR-7055-5p	0.417938	0.495832	1.97297	0.251312	0.801573	NA	0	0	0	0	1.35269	0.859488	0.941252	1.44389	0	0	0
chr7:47083203-47083224	MIMAT0028016	mmu-miR-7056-5p	0.426479	-0.422882	2.19489	-0.192667	0.84722	NA	0	0	1.06765	1.17962	0	0	0	0	2.44401	0	0
chr7:57581070-57581090	MIMAT0025137	mmu-miR-6389	0	NA	NA	NA	NA	NA	0	0	0	0	0	0	0	0	0	0	0
chr7:61683166-61683189	MIMAT0014819	mmu-miR-344d-1-5p	0.467602	1.16325	1.92021	0.605794	0.544652	NA	0	0	0	1.17962	0	0.859488	1.8825	0	1.222	0	0
chr7:61685318-61685341	MIMAT0014961	mmu-miR-344d-2-5p	0.107238	-0.750537	3.14975	-0.238285	0.81166	NA	0	0	0	1.17962	0	0	0	0	0	0	0
chr7:61735579-61735598	MIMAT0014923	mmu-miR-344e-5p	0.107238	-0.750537	3.14975	-0.238285	0.81166	NA	0	0	0	1.17962	0	0	0	0	0	0	0
chr7:61739390-61739409	MIMAT0022383	mmu-miR-344h-5p	0	NA	NA	NA	NA	NA	0	0	0	0	0	0	0	0	0	0	0
chr7:61739350-61739371	MIMAT0022384	mmu-miR-344h-3p	0	NA	NA	NA	NA	NA	0	0	0	0	0	0	0	0	0	0	0
chr7:61742406-61742425	MIMAT0022383_1	mmu-miR-344h-5p	0	NA	NA	NA	NA	NA	0	0	0	0	0	0	0	0	0	0	0
chr7:61742366-61742387	MIMAT0022384_1	mmu-miR-344h-3p	0	NA	NA	NA	NA	NA	0	0	0	0	0	0	0	0	0	0	0
chr7:61790556-61790578	MIMAT0014925	mmu-miR-344b-5p	0	NA	NA	NA	NA	NA	0	0	0	0	0	0	0	0	0	0	0
chr7:61837363-61837385	MIMAT0014927	mmu-miR-344c-5p	0.127117	-0.269644	3.14975	-0.0856079	0.931778	NA	0	0	0	0	0.676345	0	0	0.721943	0	0	0
chr7:61877819-61877844	MIMAT0017038	mmu-miR-344-5p	0.23719	0.211254	2.51728	0.0839216	0.933119	NA	0	1.02765	0	0	0	0.859488	0	0.721943	0	0	0
chr7:61940073-61940098	MIMAT0017038_1	mmu-miR-344-5p	0.192807	-0.269643	3.11058	-0.086686	0.930921	NA	0	0	0	1.17962	0	0	0.941252	0	0	0	0
chr7:61982335-61982355	MIMAT0014929	mmu-miR-344g-5p	0.372275	0.0565054	2.03206	0.0278069	0.977816	NA	0	0	0	1.17962	0.676345	0	0	1.44389	0	0.795177	0
chr7:62085281-62085300	MIMAT0022503	mmu-miR-344i	0.313302	-0.326182	2.36157	-0.138121	0.890145	NA	0	0	0	1.17962	0.676345	0	0	0	0	1.59035	0
chr7:64205868-64205888	MIMAT0017059	mmu-miR-211-3p	0	NA	NA	NA	NA	NA	0	0	0	0	0	0	0	0	0	0	0
chr7:64250077-64250097	MIMAT0025170	mmu-miR-6416-5p	0	NA	NA	NA	NA	NA	0	0	0	0	0	0	0	0	0	0	0
chr7:64249989-64250009	MIMAT0025171	mmu-miR-6416-3p	0	NA	NA	NA	NA	NA	0	0	0	0	0	0	0	0	0	0	0
chr7:66381702-66381719	MIMAT0028018	mmu-miR-7057-5p	0	NA	NA	NA	NA	NA	0	0	0	0	0	0	0	0	0	0	0
chr7:66381669-66381690	MIMAT0028019	mmu-miR-7057-3p	0	NA	NA	NA	NA	NA	0	0	0	0	0	0	0	0	0	0	0
chr7:73819590-73819612	MIMAT0028436	mmu-miR-7234-5p	0	NA	NA	NA	NA	NA	0	0	0	0	0	0	0	0	0	0	0
chr7:73819619-73819641	MIMAT0028437	mmu-miR-7234-3p	0	NA	NA	NA	NA	NA	0	0	0	0	0	0	0	0	0	0	0
chr7:81613348-81613368	MIMAT0049873	mmu-miR-12203-5p	0	NA	NA	NA	NA	NA	0	0	0	0	0	0	0	0	0	0	0
chr7:81613308-81613329	MIMAT0049874	mmu-miR-12203-3p	0	NA	NA	NA	NA	NA	0	0	0	0	0	0	0	0	0	0	0
chr7:96305740-96305760	MIMAT0025144	mmu-miR-6394	0	NA	NA	NA	NA	NA	0	0	0	0	0	0	0	0	0	0	0
chr7:99552288-99552311	MIMAT0017027	mmu-miR-326-5p	0.200661	-1.39948	3.07569	-0.455012	0.649101	NA	0	1.02765	0	1.17962	0	0	0	0	0	0	0
chr7:100882388-100882409	MIMAT0014933	mmu-miR-3102-5p	0.0781353	0.307426	3.14975	0.0976031	0.922247	NA	0	0	0	0	0	0.859488	0	0	0	0	0
chr7:126368013-126368036	MIMAT0028020	mmu-miR-7058-5p	0	NA	NA	NA	NA	NA	0	0	0	0	0	0	0	0	0	0	0
chr7:126367971-126367992	MIMAT0028021	mmu-miR-7058-3p	0	NA	NA	NA	NA	NA	0	0	0	0	0	0	0	0	0	0	0
chr7:126579474-126579495	MIMAT0028023	mmu-miR-7059-3p	0.0722888	0.307426	3.14975	0.0976031	0.922247	NA	0	0	0	0	0	0	0	0	0	0.795177	0
chr7:127489251-127489272	MIMAT0028024	mmu-miR-7060-5p	0.0614859	-0.750537	3.14975	-0.238285	0.81166	NA	0	0	0	0	0.676345	0	0	0	0	0	0
chr7:127489367-127489387	MIMAT0028025	mmu-miR-7060-3p	0.387667	1.83198	2.23153	0.820955	0.411672	NA	0	0	0	0	0	0	1.8825	0	1.222	0	1.15983
chr7:127708534-127708555	MIMAT0003892	mmu-miR-762	0	NA	NA	NA	NA	NA	0	0	0	0	0	0	0	0	0	0	0
chr7:130908273-130908294	MIMAT0028026	mmu-miR-7061-5p	0	NA	NA	NA	NA	NA	0	0	0	0	0	0	0	0	0	0	0
chr7:130908314-130908335	MIMAT0028027	mmu-miR-7061-3p	0.244866	0.211254	2.49437	0.0846923	0.932506	NA	0	0	0	0	0.676345	0	0	0	1.222	0.795177	0
chr7:135566234-135566255	MIMAT0009435	mmu-miR-1962	0.267412	-1.40012	3.14284	-0.445496	0.655961	NA	2.94154	0	0	0	0	0	0	0	0	0	0
chr7:139779085-139779106	MIMAT0025153	mmu-miR-6401	0	NA	NA	NA	NA	NA	0	0	0	0	0	0	0	0	0	0	0
chr7:139957598-139957622	MIMAT0029898	mmu-miR-7686-5p	0	NA	NA	NA	NA	NA	0	0	0	0	0	0	0	0	0	0	0
chr7:139957566-139957587	MIMAT0029899	mmu-miR-7686-3p	0	NA	NA	NA	NA	NA	0	0	0	0	0	0	0	0	0	0	0
chr7:139957732-139957752	MIMAT0004546	mmu-miR-202-5p	0.0855684	0.307426	3.14975	0.0976031	0.922247	NA	0	0	0	0	0	0	0.941252	0	0	0	0
chr7:139957695-139957716	MIMAT0000235	mmu-miR-202-3p	0.0614859	-0.750537	3.14975	-0.238285	0.81166	NA	0	0	0	0	0.676345	0	0	0	0	0	0
chr7:139986846-139986869	MIMAT0028028	mmu-miR-7062-5p	0.0970587	-0.750537	3.14975	-0.238285	0.81166	NA	0	0	1.06765	0	0	0	0	0	0	0	0
chr7:139986809-139986831	MIMAT0028029	mmu-miR-7062-3p	0.0614859	-0.750537	3.14975	-0.238285	0.81166	NA	0	0	0	0	0.676345	0	0	0	0	0	0
chr7:141992180-141992204	MIMAT0014939	mmu-miR-3104-5p	0.0781353	0.307426	3.14975	0.0976031	0.922247	NA	0	0	0	0	0	0.859488	0	0	0	0	0
chr7:142577112-142577133	MIMAT0003725	mmu-miR-675-5p	0	NA	NA	NA	NA	NA	0	0	0	0	0	0	0	0	0	0	0
chr7:142577078-142577099	MIMAT0003726	mmu-miR-675-3p	0.105439	0.307426	3.14975	0.0976031	0.922247	NA	0	0	0	0	0	0	0	0	0	0	1.15983
chr7:143570731-143570754	MIMAT0028032	mmu-miR-7064-5p	0.171558	-0.269644	3.14975	-0.0856079	0.931778	NA	0	1.02765	0	0	0	0.859488	0	0	0	0	0
chr7:143570673-143570693	MIMAT0028033	mmu-miR-7064-3p	0.133706	-0.750537	3.14975	-0.238285	0.81166	NA	1.47077	0	0	0	0	0	0	0	0	0	0
chr7:143933171-143933191	MIMAT0025156	mmu-miR-6404	0	NA	NA	NA	NA	NA	0	0	0	0	0	0	0	0	0	0	0
chr7:144009267-144009288	MIMAT0014941	mmu-miR-3105-5p	0	NA	NA	NA	NA	NA	0	0	0	0	0	0	0	0	0	0	0
chr7:144009304-144009325	MIMAT0014942	mmu-miR-3105-3p	0.611461	2.55177	2.36471	1.0791	0.280542	NA	0	0	0	0	0	0	0	0	0	5.56624	1.15983
chr8:8690141-8690162	MIMAT0029814	mmu-miR-7654-5p	0.182627	-0.269644	3.14975	-0.0856079	0.931778	NA	0	0	1.06765	0	0	0	0.941252	0	0	0	0
chr8:8690093-8690114	MIMAT0029815	mmu-miR-7654-3p	0.159054	-0.269644	3.14975	-0.0856079	0.931778	NA	0	1.02765	0	0	0	0	0	0.721943	0	0	0
chr8:12948035-12948058	MIMAT0036460	mmu-miR-9768-3p	0	NA	NA	NA	NA	NA	0	0	0	0	0	0	0	0	0	0	0
chr8:13136077-13136097	MIMAT0028034	mmu-miR-7065-5p	0.133706	-0.750537	3.14975	-0.238285	0.81166	NA	1.47077	0	0	0	0	0	0	0	0	0	0
chr8:13136112-13136132	MIMAT0028035	mmu-miR-7065-3p	0.510437	-1.29041	1.86428	-0.692175	0.488827	NA	0	1.02765	0	0	2.70538	0	0	0.721943	0	0	1.15983
chr8:16168768-16168789	MIMAT0014818	mmu-miR-3106-3p	0.171558	-0.269644	3.14975	-0.0856079	0.931778	NA	0	1.02765	0	0	0	0.859488	0	0	0	0	0
chr8:25159150-25159171	MIMAT0031413	mmu-miR-8108	0.0934232	-0.750537	3.14975	-0.238285	0.81166	NA	0	1.02765	0	0	0	0	0	0	0	0	0
chr8:34166689-34166710	MIMAT0025146	mmu-miR-6395	0	NA	NA	NA	NA	NA	0	0	0	0	0	0	0	0	0	0	0
chr8:40307908-40307929	MIMAT0029838	mmu-miR-7666-5p	0	NA	NA	NA	NA	NA	0	0	0	0	0	0	0	0	0	0	0
chr8:64514401-64514422	MIMAT0003500	mmu-miR-710	0	NA	NA	NA	NA	NA	0	0	0	0	0	0	0	0	0	0	0
chr8:70798172-70798192	MIMAT0028449	mmu-miR-7240-3p	0.234979	0.211254	2.52407	0.0836957	0.933298	NA	0	0	1.06765	0	0	0	0	0.721943	0	0.795177	0
chr8:70895543-70895565	MIMAT0028038	mmu-miR-7067-5p	0	NA	NA	NA	NA	NA	0	0	0	0	0	0	0	0	0	0	0
chr8:70895508-70895528	MIMAT0028039	mmu-miR-7067-3p	0.638372	0.978461	1.56451	0.625411	0.531701	NA	0	0	1.06765	0	0.676345	0	0.941252	0	1.222	0.795177	2.31967
chr8:72470069-72470089	MIMAT0028042	mmu-miR-7068-5p	0.0855684	0.307426	3.14975	0.0976031	0.922247	NA	0	0	0	0	0	0	0.941252	0	0	0	0
chr8:73016523-73016543	MIMAT0019354	mmu-miR-28b	0	NA	NA	NA	NA	NA	0	0	0	0	0	0	0	0	0	0	0
chr8:83723903-83723923	MIMAT0031414	mmu-miR-1668	0.425986	1.07183	1.77372	0.604286	0.545654	NA	0	0	1.06765	0	0	0	0.941252	0.721943	0	0.795177	1.15983
chr8:84011549-84011569	MIMAT0017333	mmu-miR-1199-3p	0	NA	NA	NA	NA	NA	0	0	0	0	0	0	0	0	0	0	0
chr8:84086167-84086185	MIMAT0003499	mmu-miR-709	0	NA	NA	NA	NA	NA	0	0	0	0	0	0	0	0	0	0	0
chr8:84208527-84208548	MIMAT0017019	mmu-miR-23a-5p	0.0614859	-0.750537	3.14975	-0.238285	0.81166	NA	0	0	0	0	0.676345	0	0	0	0	0	0
chr8:84867952-84867974	MIMAT0028044	mmu-miR-7069-5p	0.504114	-0.0121377	2.14107	-0.005669	0.995477	NA	2.94154	0	0	0	0	0	0	1.44389	0	0	1.15983
chr8:85700935-85700955	MIMAT0031415	mmu-miR-8109	0	NA	NA	NA	NA	NA	0	0	0	0	0	0	0	0	0	0	0
chr8:88138211-88138233	MIMAT0028048	mmu-miR-7071-5p	0.105439	0.307426	3.14975	0.0976031	0.922247	NA	0	0	0	0	0	0	0	0	0	0	1.15983
chr8:89024791-89024811	MIMAT0031416	mmu-miR-8110	0	NA	NA	NA	NA	NA	0	0	0	0	0	0	0	0	0	0	0
chr8:94505051-94505072	MIMAT0028050	mmu-miR-7072-5p	0.0781353	0.307426	3.14975	0.0976031	0.922247	NA	0	0	0	0	0	0.859488	0	0	0	0	0
chr8:94505085-94505105	MIMAT0028051	mmu-miR-7072-3p	0	NA	NA	NA	NA	NA	0	0	0	0	0	0	0	0	0	0	0
chr8:95753188-95753209	MIMAT0028052	mmu-miR-7073-5p	0.518193	-0.265278	1.72702	-0.153604	0.877922	NA	1.47077	0	0	0	1.35269	0.859488	0	0	1.222	0.795177	0
chr8:95753151-95753172	MIMAT0028053	mmu-miR-7073-3p	0.296974	0.587865	2.39604	0.245348	0.806187	NA	0	1.02765	0	0	0	0	0	1.44389	0	0.795177	0
chr8:105308419-105308440	MIMAT0017030	mmu-miR-328-5p	0.505319	0.416595	1.738	0.239698	0.810564	NA	0	1.02765	1.06765	0	0	0.859488	0	1.44389	0	0	1.15983
chr8:105615481-105615505	MIMAT0009439	mmu-miR-1966-5p	0.507467	-2.02674	2.08833	-0.970509	0.331793	NA	0	4.11062	0	0	0.676345	0	0	0	0	0.795177	0
chr8:105951672-105951694	MIMAT0028054	mmu-miR-7074-5p	0	NA	NA	NA	NA	NA	0	0	0	0	0	0	0	0	0	0	0
chr8:105951637-105951659	MIMAT0028055	mmu-miR-7074-3p	0	NA	NA	NA	NA	NA	0	0	0	0	0	0	0	0	0	0	0
chr8:107096081-107096101	MIMAT0028056	mmu-miR-7075-5p	0	NA	NA	NA	NA	NA	0	0	0	0	0	0	0	0	0	0	0
chr8:108936870-108936892	MIMAT0014947	mmu-miR-3108-5p	0.545951	1.39061	2.13647	0.650892	0.515116	NA	0	0	0	1.17962	0	0	0	0	3.66601	0	1.15983
chr8:108936911-108936931	MIMAT0014948	mmu-miR-3108-3p	0	NA	NA	NA	NA	NA	0	0	0	0	0	0	0	0	0	0	0
chr8:111689649-111689669	MIMAT0028058	mmu-miR-7076-5p	0	NA	NA	NA	NA	NA	0	0	0	0	0	0	0	0	0	0	0
chr8:111689601-111689621	MIMAT0028059	mmu-miR-7076-3p	0	NA	NA	NA	NA	NA	0	0	0	0	0	0	0	0	0	0	0
chr8:117453025-117453045	MIMAT0028060	mmu-miR-7077-5p	0	NA	NA	NA	NA	NA	0	0	0	0	0	0	0	0	0	0	0
chr8:117453060-117453079	MIMAT0028061	mmu-miR-7077-3p	0.528892	0.469368	1.731	0.271155	0.786272	NA	0	0	2.13529	0	0	0.859488	0.941252	0.721943	0	0	1.15983
chr8:117459270-117459289	MIMAT0028062	mmu-miR-7078-5p	0	NA	NA	NA	NA	NA	0	0	0	0	0	0	0	0	0	0	0
chr8:117459308-117459328	MIMAT0028063	mmu-miR-7078-3p	0.105439	0.307426	3.14975	0.0976031	0.922247	NA	0	0	0	0	0	0	0	0	0	0	1.15983
chr8:120538696-120538720	MIMAT0029902	mmu-miR-7687-5p	0.605887	-0.858255	1.84996	-0.463931	0.642697	NA	0	3.08296	1.06765	0	0	1.71898	0	0	0	0.795177	0
chr8:120538734-120538754	MIMAT0029903	mmu-miR-7687-3p	0.563437	-0.404434	2.12525	-0.190299	0.849075	NA	0	3.08296	0	0	0	0	0	0	0	0.795177	2.31967
chr8:121978024-121978047	MIMAT0028442	mmu-miR-7237-5p	0.0970587	-0.750537	3.14975	-0.238285	0.81166	NA	0	0	1.06765	0	0	0	0	0	0	0	0
chr8:122622265-122622288	MIMAT0025147	mmu-miR-6396	0	NA	NA	NA	NA	NA	0	0	0	0	0	0	0	0	0	0	0
chr8:124022688-124022710	MIMAT0009440	mmu-miR-1967	0	NA	NA	NA	NA	NA	0	0	0	0	0	0	0	0	0	0	0
chr8:128278188-128278208	MIMAT0025148	mmu-miR-21c	0	NA	NA	NA	NA	NA	0	0	0	0	0	0	0	0	0	0	0
chr8:128359251-128359272	MIMAT0007868	mmu-miR-1903	0.0934232	-0.750537	3.14975	-0.238285	0.81166	NA	0	1.02765	0	0	0	0	0	0	0	0	0
chr9:7784390-7784409	MIMAT0022363	mmu-miR-5618-5p	0	NA	NA	NA	NA	NA	0	0	0	0	0	0	0	0	0	0	0
chr9:7784423-7784440	MIMAT0022364	mmu-miR-5618-3p	0	NA	NA	NA	NA	NA	0	0	0	0	0	0	0	0	0	0	0
chr9:8246796-8246817	MIMAT0007869	mmu-miR-1899	0	NA	NA	NA	NA	NA	0	0	0	0	0	0	0	0	0	0	0
chr9:9894484-9894506	MIMAT0024858	mmu-miR-6237	0	NA	NA	NA	NA	NA	0	0	0	0	0	0	0	0	0	0	0
chr9:14180055-14180072	MIMAT0049875	mmu-miR-12204-5p	0	NA	NA	NA	NA	NA	0	0	0	0	0	0	0	0	0	0	0
chr9:15312611-15312632	MIMAT0029802	mmu-miR-7650-5p	0	NA	NA	NA	NA	NA	0	0	0	0	0	0	0	0	0	0	0
chr9:15312648-15312669	MIMAT0029803	mmu-miR-7650-3p	0	NA	NA	NA	NA	NA	0	0	0	0	0	0	0	0	0	0	0
chr9:20914134-20914159	MIMAT0028068	mmu-miR-7081-5p	0	NA	NA	NA	NA	NA	0	0	0	0	0	0	0	0	0	0	0
chr9:21032261-21032282	MIMAT0007870	mmu-miR-1900	0	NA	NA	NA	NA	NA	0	0	0	0	0	0	0	0	0	0	0
chr9:21075563-21075583	MIMAT0028070	mmu-miR-7082-5p	0.0781353	0.307426	3.14975	0.0976031	0.922247	NA	0	0	0	0	0	0.859488	0	0	0	0	0
chr9:21496537-21496559	MIMAT0000229_1	mmu-miR-199a-5p	0	NA	NA	NA	NA	NA	0	0	0	0	0	0	0	0	0	0	0
chr9:21496498-21496519	MIMAT0000230_1	mmu-miR-199a-3p	0	NA	NA	NA	NA	NA	0	0	0	0	0	0	0	0	0	0	0
chr9:21613452-21613477	MIMAT0009443	mmu-miR-1946b	0	NA	NA	NA	NA	NA	0	0	0	0	0	0	0	0	0	0	0
chr9:22113988-22114008	MIMAT0028074	mmu-miR-7084-5p	0.574845	-2.14349	1.61365	-1.32835	0.184062	NA	1.47077	2.05531	0	1.17962	0.676345	0	0.941252	0	0	0	0
chr9:22113951-22113972	MIMAT0028075	mmu-miR-7084-3p	0.644978	-0.862781	1.64572	-0.524257	0.6001	NA	1.47077	0	2.13529	0	0.676345	0	0	0	1.222	1.59035	0
chr9:44400428-44400449	MIMAT0028076	mmu-miR-7085-5p	0.133706	-0.750537	3.14975	-0.238285	0.81166	NA	1.47077	0	0	0	0	0	0	0	0	0	0
chr9:45266682-45266702	MIMAT0028078	mmu-miR-7086-5p	0	NA	NA	NA	NA	NA	0	0	0	0	0	0	0	0	0	0	0
chr9:45266643-45266663	MIMAT0028079	mmu-miR-7086-3p	0	NA	NA	NA	NA	NA	0	0	0	0	0	0	0	0	0	0	0
chr9:45939565-45939585	MIMAT0028080	mmu-miR-7087-5p	0.186846	-1.40012	3.14284	-0.445496	0.655961	NA	0	2.05531	0	0	0	0	0	0	0	0	0
chr9:45939521-45939542	MIMAT0028081	mmu-miR-7087-3p	0.105439	0.307426	3.14975	0.0976031	0.922247	NA	0	0	0	0	0	0	0	0	0	0	1.15983
chr9:52115653-52115673	MIMAT0024864	mmu-miR-6244	0.0781353	0.307426	3.14975	0.0976031	0.922247	NA	0	0	0	0	0	0.859488	0	0	0	0	0
chr9:53400808-53400829	MIMAT0025132	mmu-miR-130c	0	NA	NA	NA	NA	NA	0	0	0	0	0	0	0	0	0	0	0
chr9:54708317-54708338	MIMAT0022505	mmu-miR-5710	0	NA	NA	NA	NA	NA	0	0	0	0	0	0	0	0	0	0	0
chr9:58221155-58221175	MIMAT0025131	mmu-miR-6385	0	NA	NA	NA	NA	NA	0	0	0	0	0	0	0	0	0	0	0
chr9:62122565-62122585	MIMAT0020644	mmu-miR-5133	0	NA	NA	NA	NA	NA	0	0	0	0	0	0	0	0	0	0	0
chr9:67727758-67727780	MIMAT0028450	mmu-miR-7241-5p	0	NA	NA	NA	NA	NA	0	0	0	0	0	0	0	0	0	0	0
chr9:67727717-67727738	MIMAT0028451	mmu-miR-7241-3p	0	NA	NA	NA	NA	NA	0	0	0	0	0	0	0	0	0	0	0
chr9:67729556-67729577	MIMAT0028452	mmu-miR-7242-5p	0	NA	NA	NA	NA	NA	0	0	0	0	0	0	0	0	0	0	0
chr9:67729499-67729520	MIMAT0028453	mmu-miR-7242-3p	0	NA	NA	NA	NA	NA	0	0	0	0	0	0	0	0	0	0	0
chr9:69456958-69456981	MIMAT0014949	mmu-miR-3109-5p	0	NA	NA	NA	NA	NA	0	0	0	0	0	0	0	0	0	0	0
chr9:69456997-69457017	MIMAT0014950	mmu-miR-3109-3p	0.165712	-0.269644	3.14975	-0.0856079	0.931778	NA	0	1.02765	0	0	0	0	0	0	0	0.795177	0
[truncated: 112 more rows]
